# Supplementary material for: An organocatalytic domino Michael-alkylation reaction: highly enantioselective construction of spiro-cyclopentanoneoxindoles and tetronic acid scaffolds
Source: Royal Society of Chemistry journal article supplement (doi:10.1039/c4cc05207b), 2014-09-30
Supplement: c4cc05207b1.pdf [file c4cc05207b1.pdf]

# Organocatalytic Domino Michael–Alkylation Reaction: Highly Enantioselective Construction of Spiro- cyclopentanoneoxindoles and Tetronic acid Scaffolds

Jing Zhou,<sup>a,b</sup> Qi-Lin Wang,<sup>a,b</sup> Lin Peng,<sup>a</sup> Fang Tian,<sup>a</sup> Xiao-Ying Xu<sup>\*a</sup> and Li-Xin Wang<sup>\*a</sup>

<sup>a</sup>Key Laboratory of Asymmetric Synthesis and Chirotechnology of Sichuan Province, Chengdu Institute of Organic Chemistry, Chinese Academy of Sciences, Chengdu 610041, China

<sup>b</sup>University of Chinese Academy of Sciences, Beijing, China

*E-mail: wlxioc@cioc.ac.cn; xuxy@cioc.ac.cn*

## Table of Contents

|                                                                                                                                                |     |
|------------------------------------------------------------------------------------------------------------------------------------------------|-----|
| 1. Optimization of the Reaction Conditions of N-methyl Protected Methyleneindolinone <b>1b</b> with Ethyl 4-chloroacetoacetate <b>2a</b>       | S2  |
| 2. General Methods                                                                                                                             | S3  |
| 3. Preparation of Materials and Catalysts                                                                                                      | S3  |
| 4. General Procedure for Asymmetric Domino Michael-Alkylation Reaction of Methyleneindolinones with $\gamma$ -halogenated- $\beta$ -ketoesters | S3  |
| 5. Characterization Data and HPLC Conditions of Products <b>4</b> and <b>5</b>                                                                 | S4  |
| 6. References                                                                                                                                  | S16 |
| 7. NMR Spectra                                                                                                                                 | S18 |
| 8. HPLC Spectra                                                                                                                                | S41 |
| 9. Single-Crystal X-ray Crystallography of Products <b>4d</b> and <b>5f</b>                                                                    | S71 |

## 1. Optimization of the reaction conditions of N-methyl protected methyleneindolinone **1b** with ethyl 4-chloroacetoacetate **2a**

A series of catalysts, solvents and reaction temperature were examined, and the results were summarized in Table 1. Quinine based thiourea catalyst **3d** afforded better results than catalysts **3a-3c**, **3e** with chiral diamine scaffolds (Table 1, entry 4 vs entries 1-3, 5). All solvents provided **5a** as the main product with moderate to good yields and enantioselectivities (Table 1, entries 6-9). In terms of yield and stereoselectivity, chloroform was chosen as the suitable solvent (Table 1, entry 4). Increasing or decreasing reaction temperature allowed slight decreases in stereoselectivities (Table 1, entry 4 vs entries 10, 11). Based on these screenings, a set of optimal reaction conditions were established: 0.2 mmol of **1b**, 0.2 mmol of **2a** and catalyst **3d** (20 mol %) were stirred in chloroform (1.0 mL) for 24 h at room temperature, then 2 equivs of  $\text{KHCO}_3$  was added and the crude mixture was stirred for other 48 h at room temperature.

**Table 1.** Optimization of the reaction conditions <sup>a</sup>

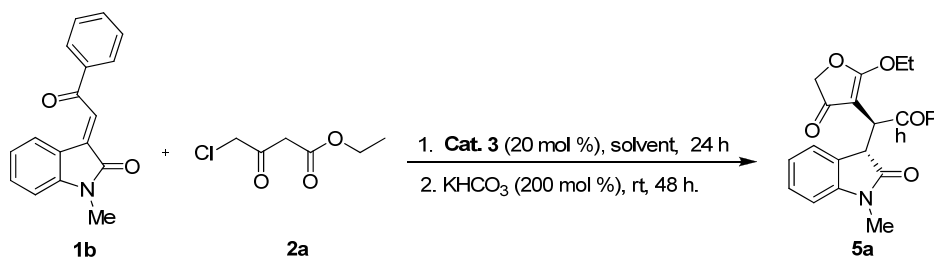

| Entry | Cat.      | solvent                  | T (°C) | yield (%) <sup>b</sup> | dr <sup>c</sup> | ee (%) <sup>d</sup>              |
|-------|-----------|--------------------------|--------|------------------------|-----------------|----------------------------------|
| 1     | <b>3a</b> | $\text{CHCl}_3$          | 25     | 70                     | 1.0:1           | 51 <sup>e</sup> /49 <sup>e</sup> |
| 2     | <b>3b</b> | $\text{CHCl}_3$          | 25     | 68                     | 1:1.2           | 58 <sup>e</sup> /51 <sup>e</sup> |
| 3     | <b>3c</b> | $\text{CHCl}_3$          | 25     | 65                     | 1.3:1           | 42/64                            |
| 4     | <b>3d</b> | $\text{CHCl}_3$          | 25     | 72                     | 1.2:1           | 84/>99                           |
| 5     | <b>3e</b> | $\text{CHCl}_3$          | 25     | 50                     | 1.5:1           | 36/55                            |
| 6     | <b>3d</b> | $\text{CH}_2\text{Cl}_2$ | 25     | 65                     | 1.1:1           | 86/96                            |
| 7     | <b>3d</b> | $\text{PhCH}_3$          | 25     | 70                     | 1:1.6           | 87/85                            |
| 8     | <b>3d</b> | THF                      | 25     | 50                     | 1:1.4           | 46/48                            |
| 9     | <b>3d</b> | EtOAc                    | 25     | 71                     | 1:1.2           | 62/62                            |
| 10    | <b>3d</b> | $\text{CHCl}_3$          | 45     | 70                     | 1.3:1           | 82/94                            |
| 11    | <b>3d</b> | $\text{CHCl}_3$          | -5     | 73                     | 1.6:1           | 84/95                            |

<sup>a</sup> Unless otherwise noted, the reaction was performed on a 0.2 mmol scale in 1.0 mL solvent. <sup>b</sup> Isolated yields of mixture of diastereomers. <sup>c</sup> Determined by chiral HPLC

analysis; dr and ee value of the major product **5a**.<sup>d</sup> The major diastereomers, determined by chiral HPLC analysis.<sup>e</sup> Contrary configuration to **5f**.

---

## 2. General Methods.

Commercial grade solvent was dried and purified by standard procedures as specified in Purification of Laboratory Chemicals, 4th Ed (Armarego, W. L. F.; Perrin, D. D. Butterworth Heinemann: 1997). Racemic products were obtained from corresponding substrates catalyzed by Et<sub>3</sub>N or Na<sub>2</sub>CO<sub>3</sub> at room temperature. NMR spectra were recorded with tetramethylsilane as the internal standard. <sup>1</sup>H NMR spectra were recorded at 300 MHz, and <sup>13</sup>C NMR spectra were recorded at 75 MHz (Bruker Avance). Chemical shifts (δ) are reported in ppm downfield from CDCl<sub>3</sub> (δ = 7.26 ppm) for <sup>1</sup>H NMR and relative to the central CDCl<sub>3</sub> resonance (δ = 77.0 ppm) for <sup>13</sup>C NMR spectroscopy. The following abbreviations were used to describe peak patterns where appropriate: br = broad, s = singlet, d = doublet, t = triplet, q = quartet, m = multiplet. Coupling constants were reported in Hertz (Hz). Flash column chromatography was carried out using silica gel eluting with ethyl acetate and petroleum ether. Reactions were monitored by TLC and visualized with ultraviolet light. Optical rotations were measured on a Perkin-Elmer 341 polarimeter. The enantiomeric excess (ee) of the products were determined by HPLC using Daicel Chiralpak (AD, AD-H, AY or IC) columns. Owing to the difficulty to isolate the diastereomers, yield and optical rotation below refer to mixture of diastereomers.

## 3. Preparation of materials and catalysts

Methyleneindolinones **1** were prepared following literature procedures.<sup>1, 2</sup> Ethyl 4-chloroacetoacetate **2a** was commercially available and purified by silica gel column chromatography. Methyl 4-chloroacetoacetate **2b** was commercially available and used as received. Methyl 4-bromoacetoacetate **2c** was prepared following literature procedures.<sup>3</sup> Catalyst **3a** was synthesized according to literature procedure.<sup>4</sup> Catalyst **3d** was synthesized according to literature procedure.<sup>5</sup>

## 4. General procedure for asymmetric domino Michael-Alkylation reaction of methyleneindolinones with γ-halogenated-β-ketoesters

**Typical procedure for asymmetric Michael-Alkylation domino reaction with**

### N-Boc protected methyleneindolinones

A stirred solution of catalyst **3a** (5 mol %), N-Boc protected methyleneindolinones **1** (0.20 mmol) in THF (1.0 mL) was cooled to -30 °C and  $\gamma$ -halogenated- $\beta$ - ketoesters **2** (0.2 mmol) was added at the same temperature. The reaction mixture was stirred at -30 °C for 2 days, then KHCO<sub>3</sub> (0.4 mmol) was added. The reaction solution was stirred for 1 day at rt, and concentrated in vacuo. The crude product was purified by column chromatography on silica gel to afford pure products **4**.

### Typical procedure for asymmetric Michael-Alkylation domino reaction with N-alkyl protected methyleneindolinones

A solution of catalyst **3d** (20 mol %), N-alkyl protected methyleneindolinones **1** (0.20 mmol) and ethyl 4-chloro-acetoacetate **2a** (0.2 mmol) in CHCl<sub>3</sub> (1.0 mL) was stirred at rt for 1 days, then KHCO<sub>3</sub> (0.4 mmol) was added. The reaction solution was stirred for 2 day at the same temperature, and concentrated in vacuo. The crude product was purified by column chromatography on silica gel to afford pure products **5**.

### 5. Characterization Data and HPLC Conditions of Product 4 and 5

#### 1'-tert-butyl 4-ethyl (1S, 4S, 5S)-5-benzoyl-2', 3-dioxo-1', 2'-dihydrospiro

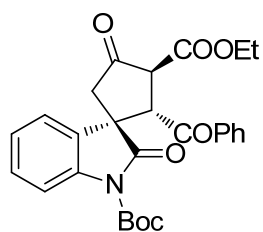

#### [cyclopentane-1, 3'-indole]-1', 4-dicarboxylate (**4a**)

94% yield,  $[\alpha]_D^{20} = +151.5$  (c 1.2, CH<sub>2</sub>Cl<sub>2</sub>); (dr = 7.3:1, >99% ee for the major diastereomer, 90% ee for the minor diastereomer);

HPLC conditions: major diastereomer: Chiralcel IC column, Hexane/EtOH (0.1% Et<sub>2</sub>NH) = 95:5, flow rate 1.0 mL/min, UV detection at 220 nm, retention time: major diastereomer: 27.20 min (major) and 22.11 min (minor); minor diastereomer: Chiralcel AD column, Hexane/EtOH (0.1% TFA) = 90:10, flow rate 1.0 mL/min, UV detection at 254 nm, retention time: major diastereomer: 7.77 min (major) and 10.37 min (minor). <sup>1</sup>H NMR (CDCl<sub>3</sub>, 300 MHz)  $\delta$  1.31 (t, *J* = 7.11 Hz, 3H), 1.51 (s, 9H), 2.65 (d, *J* = 18.33 Hz, 1H), 3.24 (d, *J* = 18.33 Hz, 1H), 4.22-4.29 (m, 2H), 4.54 (d, *J* = 11.31 Hz, 1H), 5.12 (d, *J* = 11.31 Hz, 1H), 6.98 (d, *J* = 6.72 Hz, 1H), 7.11 (t, *J* = 7.56 Hz, 1H), 7.20 (d, *J* = 8.40 Hz, 1H), 7.29 (t, *J* = 7.47 Hz, 2H), 7.36 (d, *J* = 7.38 Hz, 2H), 7.46 (d, *J* = 7.92 Hz, 2H); <sup>13</sup>C NMR (CDCl<sub>3</sub>, 75 Hz)  $\delta$  14.1, 27.8, 50.0, 55.2, 57.7, 60.4, 62.2, 84.5, 114.1, 123.5, 124.9, 127.4, 128.1, 128.8, 132.7,

133.3, 136.1, 138.4, 147.7, 166.4, 176.1, 196.1, 204.6; HRMS (ESI) Calcd. for  $C_{27}H_{27}NNaO_7 [M+Na]^+$ : 500.1685; Found: 500.1669.

**1'-tert-butyl 4-ethyl (1S, 4S, 5S)-5-(4-fluorobenzoyl)-2', 3-dioxo-1', 2'-**

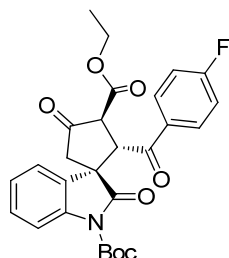

**dihydrospiro[cyclopentane-1, 3'-indole]-1', 4-dicarboxylate (4b)**

92% yield,  $[\alpha]_D^{20} = +68.5$  (c 1.2,  $CH_2Cl_2$ ); (dr = 8.1:1, 96% ee for the major diastereomer); HPLC conditions: Chiralcel IC column, Hexane/EtOH (0.1%  $Et_2NH$ ) = 95:5, flow rate 1.0 mL/min, UV detection at 220 nm, retention time: major diastereomer: 23.84 min (major) and 18.64 min (minor).  $^1H$  NMR ( $CDCl_3$ , 300 MHz)  $\delta$  1.30 (t,  $J = 7.11$  Hz, 3H), 1.54 (s, 9H), 2.66 (d,  $J = 18.33$  Hz, 1H), 3.24 (d,  $J = 18.39$  Hz, 1H), 4.23-4.30 (m, 2H), 4.53 (d,  $J = 11.31$  Hz, 1H), 5.08 (d,  $J = 11.31$  Hz, 1H), 6.95-7.01 (m, 3H), 7.13 (t,  $J = 7.50$  Hz, 1H), 7.24 (t,  $J = 7.14$  Hz, 1H), 7.41-7.50 (m, 3H);  $^{13}C$  NMR ( $CDCl_3$ , 75 Hz)  $\delta$  14.1, 27.8, 49.8, 55.6, 57.7, 60.4, 62.3, 84.9, 114.9, 115.4, 123.6, 124.8, 127.0, 128.9, 130.1, 132.5, 138.4, 147.7, 164.0, 166.3, 176.1, 194.5, 204.4; HRMS (ESI) Calcd. for  $C_{27}H_{26}FNNaO_7 [M+Na]^+$ : 518.1591; Found: 518.1586.

**1'-tert-butyl 4-ethyl (1S, 4S, 5S)-5-(4-chlorobenzoyl)-2', 3-dioxo-1',**

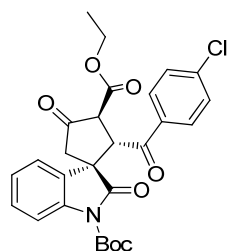

**2'-dihydrospiro[cyclopentane-1, 3'-indole]-1', 4-dicarboxylate (4c)**

95% yield,  $[\alpha]_D^{20} = +49.0$  (c 1.9,  $CH_2Cl_2$ ); (dr = 10.2:1, 90% ee for the major diastereomer); HPLC conditions: Chiralcel IC column, Hexane/EtOH (0.1%  $Et_2NH$ ) = 95:5, flow rate 1.0 mL/min, UV detection at 220 nm, retention time: major diastereomer: 24.02 min (major) and 22.84 min (minor).  $^1H$  NMR ( $CDCl_3$ , 300 MHz)  $\delta$  1.31 (t,  $J = 7.14$  Hz, 3H), 1.55 (s, 9 H), 2.65 (d,  $J = 18.33$  Hz, 1H), 3.23 (d,  $J = 18.39$  Hz, 1H), 4.23-4.30 (m, 2H), 4.52 (d,  $J = 11.31$  Hz, 1H), 5.07 (d,  $J = 11.34$  Hz, 1H), 6.98 (d,  $J = 7.41$  Hz, 1H), 7.10-7.15 (m, 1H), 7.21-7.35 (m, 5H), 7.49 (d,  $J = 8.22$  Hz, 1H);  $^{13}C$  NMR ( $CDCl_3$ , 75 Hz)  $\delta$  14.1, 27.9, 49.8, 55.6, 57.8, 60.5, 62.3, 84.9, 114.1, 123.6, 124.8, 127.0, 128.5, 128.9, 129.7, 134.4, 138.3, 139.8, 147.6, 166.3, 176.0, 195.0, 204.3; HRMS (ESI) Calcd. for  $C_{27}H_{26}ClNNaO_7 [M+Na]^+$ : 534.1295; Found: 534.1286.

**1'-tert-butyl 4-ethyl (1S, 4S, 5S)-5-(4-bromobenzoyl)-2', 3-dioxo-1',**

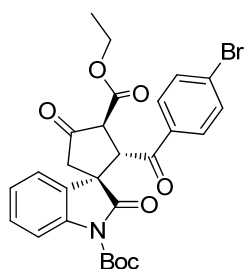

**2'-dihydrospiro[cyclopentane-1, 3'-indole]-1', 4-dicarboxylate (4d)**

93% yield,  $[\alpha]_D^{20} = +46.3$  (c 1.2,  $\text{CH}_2\text{Cl}_2$ ); (dr = 7.7:1, 82% ee for the major diastereomer); HPLC conditions: Chiralcel IC column, Hexane/EtOH (0.1%  $\text{Et}_2\text{NH}$ ) = 95:5, flow rate 1.0 mL/min, UV detection at 220 nm, retention time: major diastereomer: 24.47 min (major) and 19.78 min (minor).  $^1\text{H}$  NMR ( $\text{CDCl}_3$ , 300 MHz)  $\delta$  1.32 (t,  $J = 7.14$  Hz, 3H), 1.56 (s, 9H), 2.66 (d,  $J = 18.36$  Hz, 1H), 3.24 (d,  $J = 18.39$  Hz, 1H), 4.23-4.30 (m, 2H), 4.52 (d,  $J = 11.31$  Hz, 1H), 5.07 (d,  $J = 11.31$  Hz, 1H), 6.97 (d,  $J = 7.29$  Hz, 1H), 7.12 (t,  $J = 7.47$  Hz, 1H), 7.21-7.26 (m, 3H), 7.43-7.50 (m, 3H);  $^{13}\text{C}$  NMR ( $\text{CDCl}_3$ , 75 Hz)  $\delta$  14.1, 28.0, 49.9, 55.6, 57.8, 60.5, 62.4, 85.0, 114.9, 121.9, 123.6, 125.0, 127.0, 128.9, 129.8, 131.7, 134.8, 138.4, 147.7, 166.3, 176.0, 195.2, 204.3; HRMS (ESI) Calcd. for  $\text{C}_{27}\text{H}_{26}\text{BrNNaO}_7$   $[\text{M}+\text{Na}]^+$ : 578.0790; Found: 578.0768.

**1'-tert-butyl 4-ethyl (1S, 4S, 5S)-5-(4-methylbenzoyl)-2', 3-dioxo-1',**

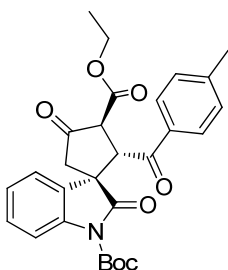

**2'-dihydrospiro[cyclopentane-1, 3'-indole]-1', 4-dicarboxylate (4e)**

96% yield,  $[\alpha]_D^{20} = +99.1$  (c 1.5,  $\text{CH}_2\text{Cl}_2$ ); (dr = 7.2:1, 91% ee for the major diastereomer); HPLC conditions: Chiralcel IC column, Hexane/EtOH (0.1%  $\text{Et}_2\text{NH}$ ) = 95:5, flow rate 1.0 mL/min, UV detection at 220 nm, retention time: major diastereomer: 32.60 min (major) and 28.75 min (minor).  $^1\text{H}$  NMR ( $\text{CDCl}_3$ , 300 MHz)  $\delta$  1.31 (t,  $J = 7.11$  Hz, 3H), 1.53 (s, 9H), 2.30 (s, 3H), 2.66 (d,  $J = 18.30$  Hz, 1H), 3.25 (d,  $J = 18.36$  Hz, 1H), 4.22-4.29 (m, 2H), 4.56 (d,  $J = 11.31$  Hz, 1H), 5.10 (d,  $J = 11.34$  Hz, 1H), 6.99 (d,  $J = 6.93$  Hz, 1H), 7.00-7.14 (d,  $J = 8.01$  Hz, 3H), 7.19-7.26 (m, 1H), 7.32 (d,  $J = 8.16$  Hz, 2H), 7.49 (d,  $J = 8.07$  Hz, 1H);  $^{13}\text{C}$  NMR ( $\text{CDCl}_3$ , 75 Hz)  $\delta$  14.0, 21.5, 27.8, 49.9, 55.4, 57.4, 60.3, 62.2, 84.4, 114.8, 121.8, 123.6, 124.7, 127.2, 129.0, 133.4, 138.4, 144.1, 147.8, 166.4, 168.7, 176.1, 195.4, 204.8; HRMS (ESI) Calcd. for  $\text{C}_{28}\text{H}_{29}\text{NNaO}_7$   $[\text{M}+\text{Na}]^+$ : 514.1842; Found: 514.1816.

**1'-tert-butyl 4-ethyl (1S, 4S, 5S)-5-(4-methoxybenzoyl)-2', 3-dioxo-1', 2'-**

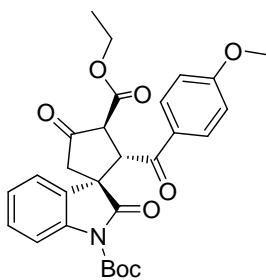

**dihydrospiro[cyclopentane-1, 3'-indole]-1', 4-dicarboxylate (4f)**

92% yield,  $[\alpha]_D^{20} = +71.2$  (c 2.3,  $\text{CH}_2\text{Cl}_2$ ); (dr = 12.1:1, 92% ee for the major diastereomer); HPLC conditions: Chiralcel AD column, Hexane/EtOH (0.1%  $\text{Et}_2\text{NH}$ ) = 90:10, flow rate 1.0 mL/min, UV detection at 220 nm, retention time: major diastereomer: 13.60 min (major) and 17.18 min (minor).  $^1\text{H}$  NMR ( $\text{CDCl}_3$ , 300 MHz)  $\delta$  1.30 (t,  $J = 7.11$  Hz, 3H), 1.52 (s, 9H), 2.66 (d,  $J = 18.30$  Hz, 1H), 3.25 (d,  $J = 18.33$  Hz, 1H), 3.79 (s, 3H), 4.21-4.28 (m, 2H), 4.56 (d,  $J = 11.34$  Hz, 1H), 5.08 (d,  $J = 11.37$  Hz, 1H), 6.78 (d,  $J = 8.82$  Hz, 2H), 6.99 (d,  $J = 7.47$  Hz, 1H), 7.11 (t,  $J = 7.56$  Hz, 1H), 7.22 (t,  $J = 7.80$  Hz, 1H), 7.43-7.50 (m, 3H);  $^{13}\text{C}$  NMR ( $\text{CDCl}_3$ , 75 Hz)  $\delta$  14.1, 27.8, 49.8, 52.1, 55.1, 55.4, 55.4, 62.2, 84.5, 113.5, 114.8, 123.7, 124.6, 127.2, 128.8, 129.7, 130.9, 138.3, 147.8, 163.7, 166.5, 176.3, 193.9, 204.9; HRMS (ESI) Calcd. for  $\text{C}_{28}\text{H}_{29}\text{NNaO}_8$   $[\text{M}+\text{Na}]^+$ : 530.1791; Found: 530.1761.

**1'-tert-butyl 4-ethyl (1S, 4S, 5S)-5-(2-methylbenzoyl)-2', 3-dioxo-1', 2'-dihydrospiro[cyclopentane-1, 3'-indole]-1', 4-dicarboxylate (4g)**

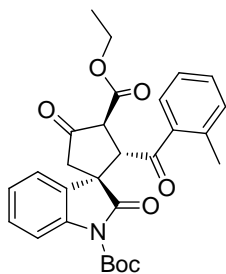

93% yield,  $[\alpha]_D^{20} = +57.5$  (c 2.5,  $\text{CH}_2\text{Cl}_2$ ); (dr = 3.6:1, 84% ee for the major diastereomer); HPLC conditions: Chiralcel IC column, Hexane/EtOH (0.1%  $\text{Et}_2\text{NH}$ ) = 95:5, flow rate 1.0 mL/min, UV detection at 220 nm, retention time: major diastereomer: 27.96 min (major) and 17.57 min (minor).  $^1\text{H}$  NMR ( $\text{CDCl}_3$ , 300 MHz)  $\delta$  1.34 (t,  $J = 7.11$  Hz, 3H), 1.51 (s, 12H), 2.61 (d,  $J = 18.27$  Hz, 1H), 3.20 (d,  $J = 18.30$  Hz, 1H), 4.25-4.33 (m, 2H), 4.49 (d,  $J = 11.64$  Hz, 1H), 5.12 (d,  $J = 11.64$  Hz, 1H), 7.11-7.16 (m, 2H), 7.19-7.30 (m, 5H), 7.58 (d,  $J = 8.16$  Hz, 1H);  $^{13}\text{C}$  NMR ( $\text{CDCl}_3$ , 75 Hz)  $\delta$  14.1, 19.0, 28.0, 50.6, 55.1, 57.4, 59.5, 62.3, 84.4, 115.3, 121.9, 123.4, 124.8, 125.4, 127.8, 129.6, 131.2, 132.0, 135.2, 138.9, 147.7, 166.5, 168.2, 175.5, 198.0, 204.6; HRMS (ESI) Calcd. for  $\text{C}_{28}\text{H}_{29}\text{NNaO}_7$   $[\text{M}+\text{Na}]^+$ : 514.1842; Found: 514.1823.

**1'-tert-butyl 4-ethyl (1S, 4S, 5S)-5-(3-methoxybenzoyl)-2', 3-dioxo-1', 2'-dihydrospiro[cyclopentane-1, 3'-indole]-1', 4-dicarboxylate (4h)**

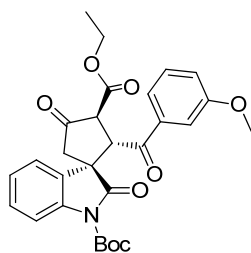

92% yield,  $[\alpha]_D^{20} = +105.7$  (c 2.1,  $\text{CH}_2\text{Cl}_2$ ); (dr = 12.2:1, >99% ee for the major diastereomer); HPLC conditions: Chiralcel IC column, Hexane/EtOH (0.1%  $\text{Et}_2\text{NH}$ ) = 95:5, flow rate 1.0 mL/min, UV detection at 220 nm, retention time: major diastereomer: 31.71 min (major) and 22.78 min (minor).  $^1\text{H}$

NMR ( $\text{CDCl}_3$ , 300 MHz)  $\delta$  1.32 (t,  $J = 7.11$  Hz, 3H), 1.53 (s, 9H), 2.65 (d,  $J = 18.30$  Hz, 1H), 3.24 (d,  $J = 18.33$  Hz, 1H), 3.74 (s, 3H), 4.24-4.31 (m, 2H), 4.54 (d,  $J = 11.31$  Hz, 1H), 5.10 (d,  $J = 11.31$  Hz, 1H), 6.77 (s, 1H), 6.97-7.01 (m, 3H), 7.05-7.26 (m, 3H), 7.51 (d,  $J = 8.16$  Hz, 1H);  $^{13}\text{C}$  NMR ( $\text{CDCl}_3$ , 75 Hz)  $\delta$  14.1, 27.8, 50.0, 51.8, 55.2, 58.0, 60.4, 62.3, 84.7, 110.9, 114.1, 114.9, 120.4, 123.5, 124.7, 127.3, 128.7, 129.0, 137.4, 138.7, 147.8, 159.3, 166.4, 176.1, 196.1, 204.6; HRMS (ESI) Calcd. for  $\text{C}_{28}\text{H}_{29}\text{NNaO}_8$   $[\text{M}+\text{Na}]^+$ : 530.1791; Found: 530.1788.

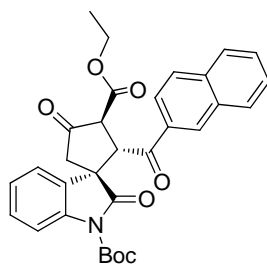

**1'-tert-butyl 4-ethyl (1S, 4S, 5S)-5-(naphthalene-2-carbonyl)-2', 3'-dioxo-1', 2'-dihydrospiro[cyclopentane-1, 3'-indole]-1', 4-dicarboxylate (4i)**

92% yield,  $[\alpha]_D^{20} = +6.9$  (c 1.1,  $\text{CH}_2\text{Cl}_2$ ); (dr = 10.1:1, 90% ee for the major diastereomer); HPLC conditions: Chiralcel IC column, Hexane/EtOH (0.1%  $\text{Et}_2\text{NH}$ ) = 95:5, flow rate 1.0 mL/min, UV detection at 220 nm, retention time: major diastereomer: 53.55 min (major) and 33.11 min (minor).  $^1\text{H}$  NMR ( $\text{CDCl}_3$ , 300 MHz)  $\delta$  1.15 (s, 9H), 1.33 (t,  $J = 7.11$  Hz, 3H), 2.70 (d,  $J = 18.27$  Hz, 1H), 3.30 (d,  $J = 18.30$  Hz, 1H), 4.25-4.32 (m, 2H), 4.63 (d,  $J = 11.34$  Hz, 1H), 5.31 (d,  $J = 11.37$  Hz, 1H), 7.04 (d,  $J = 7.38$  Hz, 1H), 7.15-7.27 (m, 4H), 7.40 (d,  $J = 8.04$  Hz, 1H), 7.53-7.57 (m, 3H), 7.67 (d,  $J = 8.58$  Hz, 1H), 7.78 (d,  $J = 8.31$  Hz, 1H);  $^{13}\text{C}$  NMR ( $\text{CDCl}_3$ , 75 Hz)  $\delta$  14.1, 27.3, 44.1, 49.9, 55.3, 60.4, 62.3, 84.3, 114.0, 114.9, 123.3, 123.6, 124.9, 126.9, 127.2, 127.5, 128.4, 128.7, 129.4, 130.1, 131.9, 133.3, 135.5, 138.4, 147.5, 166.5, 176.0, 195.8, 204.7; HRMS (ESI) Calcd. for  $\text{C}_{31}\text{H}_{29}\text{NNaO}_7$   $[\text{M}+\text{Na}]^+$ : 550.1842; Found: 550.1809.

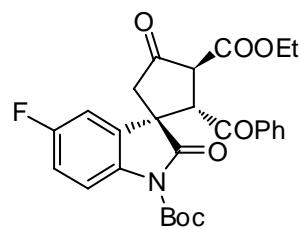

**1'-tert-butyl 4-ethyl (1S, 4S, 5S)-5-benzoyl-5'-fluoro-2', 3'-dioxo-1',**



**2'-dihydrospiro[cyclopentane-1, 3'-indole]-1', 4-dicarboxylate (4j)**

92% yield,  $[\alpha]_D^{20} = +81.5$  (c 1.8, CH<sub>2</sub>Cl<sub>2</sub>); (dr = 7.0:1, 89% ee for the major diastereomer); HPLC conditions: Chiralcel AY column, Hexane/EtOH (0.1% Et<sub>2</sub>NH) = 90:10, flow rate 1.0 mL/min, UV detection at 220 nm, retention time: major diastereomer: 11.07 min (major) and 40.46 min (minor). <sup>1</sup>H NMR (CDCl<sub>3</sub>, 300 MHz)  $\delta$  1.32 (t,  $J = 7.08$  Hz, 3H), 1.51 (s, 9 H), 2.65 (d,  $J = 18.39$  Hz, 1H), 3.25 (d,  $J = 18.42$  Hz, 1H), 4.23-4.30 (m, 2H), 4.50 (d,  $J = 11.37$  Hz, 1H), 5.12 (d,  $J = 11.37$  Hz, 1H), 6.72 (d,  $J = 7.50$  Hz, 1H), 7.27 (d,  $J = 7.11$  Hz, 1H), 7.32 (d,  $J = 7.74$  Hz, 2H), 7.40-7.52 (m, 4H); <sup>13</sup>C NMR (CDCl<sub>3</sub>, 75 Hz)  $\delta$  14.1, 28.0, 49.7, 55.4, 57.5, 60.5, 62.3, 84.8, 111.1, 115.9, 116.4, 127.5, 128.0, 128.7, 133.0, 133.5, 135.9, 147.7, 158.1, 166.2, 175.7, 195.8, 204.1; HRMS (ESI) Calcd. for C<sub>27</sub>H<sub>26</sub>FNNaO<sub>7</sub> [M+Na]<sup>+</sup>: 518.1591; Found: 518.1579.

**1'-tert-butyl 4-ethyl (1S, 4S, 5S)-5-benzoyl-5'-bromo-2', 3-dioxo-1', 2'-dihydrospiro[cyclopentane-1, 3'-indole]-1', 4-dicarboxylate (4k)**

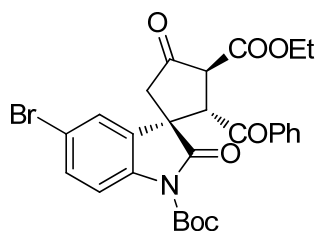

90% yield,  $[\alpha]_D^{20} = +25.2$  (c 1.5, CH<sub>2</sub>Cl<sub>2</sub>); (dr = 2.0:1, 55% ee for the major diastereomer); HPLC conditions: Chiralcel AD column, Hexane/EtOH (0.1% Et<sub>2</sub>NH) = 90:10, flow rate 1.0 mL/min, UV detection at 220 nm, retention time: major diastereomer: 6.92 min (major) and 8.39 min (minor). <sup>1</sup>H NMR (CDCl<sub>3</sub>, 300 MHz)  $\delta$  1.17 (t,  $J = 7.11$  Hz, 3H), 1.63 (s, 9H), 2.74 (d,  $J = 18.12$  Hz, 1H), 3.58 (d,  $J = 18.18$  Hz, 1H), 4.12-4.14 (m, 2H), 4.37 (d,  $J = 11.76$  Hz, 1H), 5.79 (d,  $J = 11.79$  Hz, 1H), 7.25-7.30 (m, 5H), 7.62 (d,  $J = 7.20$  Hz, 2H), 7.72 (d,  $J = 8.19$  Hz, 1H); <sup>13</sup>C NMR (CDCl<sub>3</sub>, 75 Hz)  $\delta$  14.0, 28.0, 44.7, 51.6, 53.6, 56.7, 62.3, 85.1, 113.6, 114.5, 118.1, 127.6, 128.1, 128.9, 130.5, 133.3, 136.2, 142.4, 148.4, 166.8, 176.2, 196.8, 205.5; HRMS (ESI) Calcd. for C<sub>27</sub>H<sub>26</sub>BrNNaO<sub>7</sub> [M+Na]<sup>+</sup>: 578.0790; Found: 578.0785.

**1'-tert-butyl 4-ethyl (1S, 4S, 5S)-5-benzoyl-5'-methyl-2', 3-dioxo-1', 2'-dihydrospiro[cyclopentane-1, 3'-indole]-1', 4-dicarboxylate (4l)**

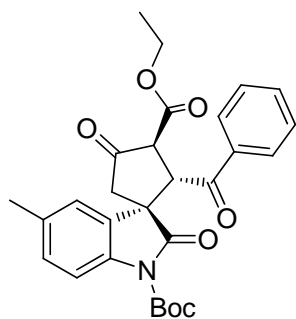

88% yield,  $[\alpha]_D^{20} = +35.6$  (c 1.8, CH<sub>2</sub>Cl<sub>2</sub>); (dr = 2.0:1, 66% ee for the major diastereomer); HPLC conditions: Chiralcel IC

column, Hexane/EtOH (0.1% Et<sub>2</sub>NH) = 90:10, flow rate 1.0 mL/min, UV detection at 220 nm, retention time: major diastereomer: 12.95 min (major) and 14.42 min (minor). <sup>1</sup>H NMR (CDCl<sub>3</sub>, 300 MHz) δ 1.32 (t, *J* = 7.08 Hz, 3H), 1.51 (s, 9H), 2.30 (s, 3H), 2.67 (d, *J* = 17.88 Hz, 1H), 3.25 (d, *J* = 18.30 Hz, 1H), 4.12-4.18 (m, 2H), 4.27 (d, *J* = 11.52 Hz, 1H), 5.11 (d, *J* = 11.31 Hz, 1H), 6.78 (s, 1H), 7.19 (t, *J* = 7.12 Hz, 1H), 7.18-7.26 (m, 1H), 7.27-7.36 (m, 4H), 7.59 (t, *J* = 8.31 Hz, 1H); <sup>13</sup>C NMR (CDCl<sub>3</sub>, 75 Hz) δ 13.9, 21.0, 28.0, 48.6, 51.9, 55.3, 57.6, 62.2, 84.3, 114.7, 115.3, 122.4, 127.2, 128.1, 128.3, 129.8, 133.3, 134.7, 136.2, 147.8, 166.5, 176.1, 196.2, 204.8; HRMS (ESI) Calcd. for C<sub>28</sub>H<sub>29</sub>NNaO<sub>7</sub> [M+Na]<sup>+</sup>: 514.1842; Found: 514.1836.

**1'-tert-butyl 4-ethyl (1S, 4S, 5S)-5-acetyl-2', 3'-dioxo-1', 2'-dihydrospiro[cyclopentane-1, 3'-indole]-1', 4-dicarboxylate (4m)**

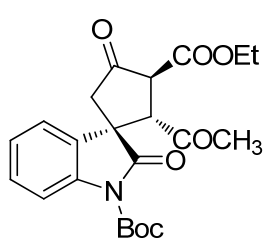

80% yield, [α]<sub>D</sub><sup>20</sup> = +30.2 (c 1.6, CH<sub>2</sub>Cl<sub>2</sub>); (dr = 1.3:1, 63% ee for the major diastereomer); HPLC conditions: Chiralcel AD column, Hexane/*i*-PrOH = 90:10, flow rate 1.0 mL/min, UV detection at 220 nm, retention time: major diastereomer: 7.13 min (major) and 10.17 min (minor). <sup>1</sup>H NMR (CDCl<sub>3</sub>, 300 MHz) δ 1.32 (t, *J* = 7.14 Hz, 3H), 1.63 (s, 9H), 1.93 (s, 3H), 2.73 (d, *J* = 18.66 Hz, 2H), 4.19-4.36 (m, 4H), 6.94 (d, *J* = 7.50 Hz, 1H), 7.24 (t, *J* = 7.50 Hz, 1H), 7.31-7.37 (m, 1H), 7.89 (t, *J* = 8.04 Hz, 1H); <sup>13</sup>C NMR (CDCl<sub>3</sub>, 75 Hz) δ 14.1, 28.0, 28.9, 49.2, 51.2, 55.8, 60.1, 62.3, 84.7, 115.6, 122.9, 124.9, 127.6, 129.6, 140.3, 148.9, 168.3, 175.9, 201.7, 203.0; HRMS (ESI) Calcd. for C<sub>22</sub>H<sub>25</sub>NNaO<sub>7</sub> [M+Na]<sup>+</sup>: 438.1529; Found: 438.1539.

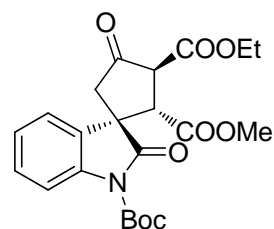

**1'-tert-butyl 4-ethyl 5-methyl (1S, 4S, 5S)-2', 3'-dioxo-1', 2'-dihydrospiro [cyclopentane-1, 3'-indole]-1', 4, 5-tricarboxylate (4n)**

93% yield, [α]<sub>D</sub><sup>20</sup> = +182.8 (c 0.7, CH<sub>2</sub>Cl<sub>2</sub>); (dr = 1.9:1, 96% ee for the major diastereomer); HPLC conditions: Chiralcel AY column, Hexane/EtOH (0.1% Et<sub>2</sub>NH) = 90:10, flow rate 1.0 mL/min, UV detection at 220 nm, retention time: major diastereomer: 11.34 min (major) and 12.48 min (minor). <sup>1</sup>H NMR (CDCl<sub>3</sub>, 300 MHz) δ 1.35 (t, *J* = 4.26 Hz, 3H), 1.66 (s, 9H), 2.64 (d, *J* = 17.04 Hz, 1H), 3.13 (d, *J*

= 18.12 Hz, 1H), 3.31 (s, 3H), 4.14 (d,  $J = 11.01$  Hz, 2H), 4.24-4.35 (m, 2H), 6.99 (d,  $J = 7.50$  Hz, 1H), 7.12 (d,  $J = 7.56$  Hz, 1H), 7.31-7.37 (m, 1H), 7.89 (t,  $J = 8.16$  Hz, 1H);  $^{13}\text{C}$  NMR ( $\text{CDCl}_3$ , 75 Hz)  $\delta$  14.1, 28.0, 43.1, 50.0, 51.5, 53.2, 56.4, 62.3, 84.9, 115.4, 122.3, 124.9, 128.2, 139.3, 148.8, 166.2, 167.9, 168.8, 175.6, 204.1; HRMS (ESI) Calcd. for  $\text{C}_{22}\text{H}_{25}\text{NNaO}_8$   $[\text{M}+\text{Na}]^+$ : 454.1478; Found: 454.1474.

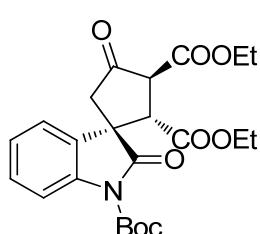

**1'-tert-butyl 4, 5-diethyl (1S, 4S, 5S)-2', 3-dioxo-1', 2'-dihydrospiro**

**[cyclopentane-1, 3'-indole]-1', 4, 5-tricarboxylate (4o)**

95% yield,  $[\alpha]_{\text{D}}^{20} = +145.2$  (c 0.9,  $\text{CH}_2\text{Cl}_2$ ); (dr = 1.6:1, 79% ee

for the major diastereomer); HPLC conditions: Chiralcel AY column, Hexane/EtOH (0.1%  $\text{Et}_2\text{NH}$ ) = 90:10, flow rate 1.0 mL/min, UV detection at 220 nm, retention time: major diastereomer: 10.09 min (major) and 14.33 min (minor).  $^1\text{H}$  NMR ( $\text{CDCl}_3$ , 300 MHz)  $\delta$  0.84 (t,  $J = 7.20$  Hz, 3H), 1.32 (t,  $J = 7.14$  Hz, 3H), 1.66 (s, 9H), 2.64 (d,  $J = 18.21$  Hz, 1H), 3.12 (d,  $J = 18.12$  Hz, 1H), 3.72-3.77 (m, 2H), 4.12 (d,  $J = 11.97$  Hz, 1H), 4.24-4.34 (m, 3H), 6.99 (d,  $J = 7.47$  Hz, 1H), 7.12 (t,  $J = 7.59$  Hz, 1H), 7.34 (t,  $J = 7.62$  Hz, 1H), 7.90 (d,  $J = 8.22$  Hz, 1H);  $^{13}\text{C}$  NMR ( $\text{CDCl}_3$ , 75 Hz)  $\delta$  13.3, 14.1, 28.0, 43.3, 50.0, 53.1, 55.6, 61.5, 62.3, 84.9, 115.4, 122.3, 125.0, 129.5, 139.5, 148.8, 166.3, 168.3, 175.6, 177.3, 204.2; HRMS (ESI) Calcd. for  $\text{C}_{23}\text{H}_{27}\text{NNaO}_8$   $[\text{M}+\text{Na}]^+$ : 468.1634; Found: 468.1633.

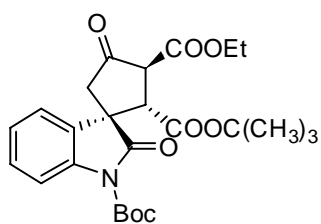

**1', 5-di-tert-butyl 4-ethyl (1S, 4S, 5S)-2', 3-dioxo-1', 2'-dihydrospiro[cyclopentane-1, 3'-indole]-1', 4, 5-tricarboxylate (4p)**

90% yield,  $[\alpha]_{\text{D}}^{20} = +106.2$  (c 0.8,  $\text{CH}_2\text{Cl}_2$ ); (dr = 1.9:1,

90% ee for the major diastereomer); HPLC conditions: Chiralcel AY column, Hexane/EtOH (0.1%  $\text{Et}_2\text{NH}$ ) = 90:10, flow rate 1.0 mL/min, UV detection at 220 nm, retention time: major diastereomer: major diastereomer: 7.00 min (major) and 6.21 min (minor).  $^1\text{H}$  NMR ( $\text{CDCl}_3$ , 300 MHz)  $\delta$  1.00 (s, 9H), 1.31 (t,  $J = 3.12$  Hz, 3H), 1.64 (s, 9H), 2.61 (d,  $J = 18.15$  Hz, 1H), 3.09 (d,  $J = 18.09$  Hz, 1H), 4.25-4.30 (m, 4H), 7.00 (d,  $J = 7.41$  Hz, 1H), 7.12 (t,  $J = 7.59$  Hz, 1H), 7.35 (t,  $J = 7.14$  Hz, 1H), 7.96 (d,  $J = 8.19$  Hz, 1H);  $^{13}\text{C}$  NMR ( $\text{CDCl}_3$ , 75 Hz)  $\delta$  14.1, 27.1, 27.9, 50.5, 51.1,

53.6, 55.7, 62.2, 82.6, 84.8, 115.3, 122.3, 125.0, 129.4, 139.6, 148.9, 166.5, 167.8, 175.7, 177.0, 204.4; HRMS (ESI) Calcd. for C<sub>25</sub>H<sub>31</sub>NNaO<sub>8</sub> [M+Na]<sup>+</sup>: 496.1947; Found: 496.1950.

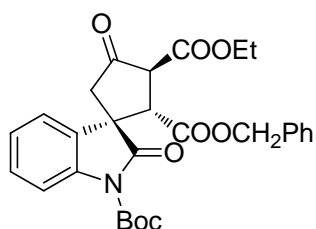

**5-benzyl 1'-tert-butyl 4-ethyl (1S, 4S, 5S)-2', 3-dioxo-1', 2'-dihydrospiro[cyclopentane-1, 3'-indole]-1', 4, 5-tricarboxylate (4q)**

91% yield,  $[\alpha]_D^{20} = +76.4$  (c 1.0, CH<sub>2</sub>Cl<sub>2</sub>); (dr = 1.4:1, 81% ee for the major diastereomer); HPLC conditions: Chiralcel AY column, Hexane/EtOH (0.1% Et<sub>2</sub>NH) = 90:10, flow rate 1.0 mL/min, UV detection at 220 nm, retention time: major diastereomer: 13.16 min (major) and 18.25 min (minor). <sup>1</sup>H NMR (CDCl<sub>3</sub>, 300 MHz)  $\delta$  1.32 (t, *J* = 7.14 Hz, 3H), 1.58 (s, 9H), 2.60 (d, *J* = 18.12 Hz, 1H), 3.10 (d, *J* = 18.12 Hz, 1H), 4.15-4.29 (m, 2H), 4.40 (d, *J* = 11.85 Hz, 1H), 4.73 (s, 2H), 4.98 (d, *J* = 12.84 Hz, 1H), 6.95 (d, *J* = 8.25 Hz, 2H), 7.20-7.34 (m, 6H), 7.75 (d, *J* = 11.76 Hz, 1H); <sup>13</sup>C NMR (CDCl<sub>3</sub>, 75 Hz)  $\delta$  14.0, 27.9, 49.4, 50.4, 52.6, 55.7, 62.3, 67.4, 84.7, 115.5, 121.7, 122.0, 124.7, 127.7, 128.2, 128.5, 129.4, 134.2, 139.2, 148.5, 166.2, 168.4, 175.4, 204.0; HRMS (ESI) Calcd. for C<sub>28</sub>H<sub>29</sub>NNaO<sub>8</sub>

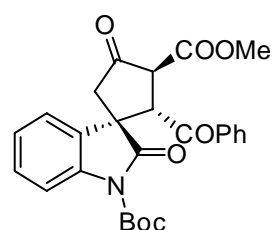

**1'-tert-butyl 4-methyl (1S, 4S, 5S)-5-benzoyl-2', 3-dioxo-1', 2'-dihydrospiro[cyclopentane-1, 3'-indole]-1', 4-dicarboxylate (4r)**

[M+Na]<sup>+</sup>: 530.1791; Found: 530.1788. 94% yield,  $[\alpha]_D^{20} = +70.3$  (c 1.1, CH<sub>2</sub>Cl<sub>2</sub>); (dr = 6.3:1, 92% ee for the major diastereomer); HPLC conditions: Chiralcel AY column, Hexane/EtOH (0.1% Et<sub>2</sub>NH) = 90:10, flow rate 1.0 mL/min, UV detection at 220 nm, retention time: major diastereomer: 17.55 min (major) and 44.55 min (minor). <sup>1</sup>H NMR (CDCl<sub>3</sub>, 300 MHz)  $\delta$  1.52 (s, 9H), 2.66 (d, *J* = 17.37 Hz, 1H), 3.25 (d, *J* = 18.36 Hz, 1H), 3.82 (s, 3H), 4.58 (d, *J* = 11.25 Hz, 1H), 5.13 (d, *J* = 11.25 Hz, 1H), 6.97 (d, *J* = 7.50 Hz, 1H), 7.11 (t, *J* = 7.56 Hz, 1H), 7.20 (d, *J* = 7.89 Hz, 1H), 7.26 (t, *J* = 8.10 Hz, 2H), 7.36 (d, *J* = 7.41 Hz, 2H), 7.46 (t, *J* = 7.77 Hz, 2H); <sup>13</sup>C NMR (CDCl<sub>3</sub>, 75 Hz)  $\delta$  27.9, 44.0, 51.8, 53.2, 55.6, 57.4, 84.6, 114.9, 121.9, 123.5, 124.9, 127.4, 128.4, 129.4, 133.5, 136.0,

138.5, 147.7, 166.9, 176.1, 196.1, 204.6; HRMS (ESI) Calcd. for  $C_{26}H_{25}NNaO_7$   $[M+Na]^+$ : 486.1529; Found: 486.1530.

**1'-tert-butyl 4-ethyl (1S, 4S, 5R)-2', 3-dioxo-5-phenyl-1', 2'-**

**dihydrospiro[cyclopentane-1, 3'-indole]-1', 4-dicarboxylate (4s)**

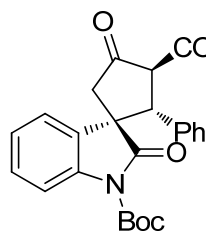

84% yield,  $[\alpha]_D^{20} = +25.2$  (c 1.5,  $CH_2Cl_2$ ); (dr = 2.7:1, 36% ee for the major diastereomer, 41% ee for the minor diastereomer); HPLC conditions: Chiralcel AD column, Hexane/EtOH = 95:5, flow rate 1.0 mL/min, UV detection at 220 nm, retention time: major diastereomer: 7.20 min (major) and 9.97 min (minor); minor diastereomer: 11.11 min (major) and 13.01 min (minor).  $^1H$  NMR ( $CDCl_3$ , 300 MHz)  $\delta$  1.22 (t,  $J = 7.17$  Hz, 3H), 1.50 (s, 9H), 2.94 (d,  $J = 7.23$  Hz, 2H), 4.09-4.20 (m, 3H), 4.58 (d,  $J = 13.41$  Hz, 1H), 6.87 (d,  $J = 6.99$  Hz, 3H), 7.07-7.16 (m, 5H), 7.47 (d,  $J = 7.25$  Hz, 1H);  $^{13}C$  NMR ( $CDCl_3$ , 75 Hz)  $\delta$  14.0, 27.9, 48.0, 55.1, 56.6, 57.7, 61.8, 84.2, 115.0, 122.1, 124.4, 127.1, 127.6, 128.0, 128.2, 129.2, 132.9, 140.0, 148.2, 168.2, 176.9, 205.6; HRMS (ESI) Calcd. for  $C_{26}H_{27}NNaO_6$   $[M+Na]^+$ : 472.1736; Found: 472.1730.

**1'-tert-butyl 4-ethyl (1S, 4S, 5S)-2', 3-dioxo-5-propyl-1', 2'-**

**dihydrospiro[cyclopentane-1, 3'-indole]-1', 4-dicarboxylate (4t)**

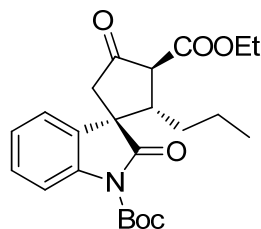

92% yield,  $[\alpha]_D^{20} = +10.2$  (c 1.2,  $CH_2Cl_2$ ); (dr = 1.3:1, 16% ee for the major diastereomer, 15% ee for the minor diastereomer); HPLC conditions: Chiralcel AD column, Hexane/*i*-PrOH = 90:10, flow rate 1.0 mL/min, UV detection at 220 nm, retention time: major diastereomer: 5.74 min (major) and 6.50 min (minor); minor diastereomer: 4.98 min (major) and 7.09 min (minor).  $^1H$  NMR ( $CDCl_3$ , 300 MHz)  $\delta$  0.73 (t,  $J = 6.48$  Hz, 3H), 1.07-1.14 (m, 4H), 1.30 (t,  $J = 7.11$  Hz, 3H), 1.65 (s, 9H), 2.54 (d,  $J = 17.91$  Hz, 1H), 3.14 (d,  $J = 17.91$  Hz, 1H), 3.75 (d,  $J = 12.00$  Hz, 1H), 4.21-4.28 (m, 3H), 6.97 (d,  $J = 7.50$  Hz, 1H), 7.36 (t,  $J = 7.68$  Hz, 2H), 7.91 (d,  $J = 8.22$  Hz, 1H);  $^{13}C$  NMR ( $CDCl_3$ , 75 Hz)  $\delta$  13.9, 20.7, 28.0, 31.4, 32.7, 48.7, 50.3, 53.6, 58.9, 61.9, 84.9, 115.1, 122.8, 124.8, 128.9, 139.2, 140.2, 148.9, 169.7, 176.5, 207.5; HRMS (ESI) Calcd. for  $C_{23}H_{29}NNaO_6$   $[M+Na]^+$ : 438.1893; Found: 438.1884.

**(3S)-3-[(1S)-1-(2-ethoxy-4-oxo-4, 5-dihydrofuran-3-yl)-2-oxo-2-phenylethyl]-1-m**

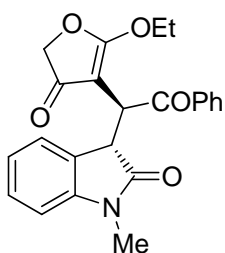

**ethyl-2, 3-dihydro-1H-indol-2-one(5a)**

72% yield,  $[\alpha]_D^{20} = +10.6$  (c 2.2, CH<sub>2</sub>Cl<sub>2</sub>); (dr = 1.2:1, 84% ee for the major diastereomer, >99% ee for the minor diastereomer); HPLC conditions: Chiralcel IC column, Hexane/i-PrOH = 50:50, flow rate 0.7 mL/min, UV detection at 220 nm, retention time:

major diastereomer: 35.90 min (major) and 63.90 min (minor), minor diastereomer: 29.54 min (major). <sup>1</sup>H NMR (CDCl<sub>3</sub>, 300 MHz) δ 1.35 (t, *J* = 7.11 Hz, 3H), 3.16 (s, 3H), 4.14 (m, 1H), 4.40-4.45 (m, 3H), 4.54 (d, *J* = 15.93 Hz, 1H), 4.71 (d, *J* = 15.96 Hz, 1H), 6.78 (d, *J* = 7.95 Hz, 1H), 6.87 (t, *J* = 7.47 Hz, 1H), 7.04 (d, *J* = 7.39 Hz, 1H), 7.26 (t, *J* = 7.82 Hz, 1H), 7.37-7.39 (m, 2H), 7.42-7.50 (m, 1H), 7.90 (d, *J* = 7.14 Hz, 1H), 8.03 (d, *J* = 7.20 Hz, 1H); <sup>13</sup>C NMR (CDCl<sub>3</sub>, 75 Hz) δ 14.6, 26.1, 42.2, 45.1, 66.7, 75.0, 89.2, 107.7, 122.1, 124.7, 126.9, 127.9, 128.3, 128.5, 133.2, 135.7, 144.0, 175.6, 181.6, 193.8, 195.1; HRMS (ESI) Calcd. for C<sub>23</sub>H<sub>21</sub>NNaO<sub>5</sub> [M+Na]<sup>+</sup>: 414.1317; Found: 414.1316.

**(3S)-3-[(1S)-1-(2-ethoxy-4-oxo-4,5-dihydrofuran-3-yl)-2-oxo-2-phenylethyl]-1-ethyl-2, 3-dihydro-1H-indol-2-one(5b)**

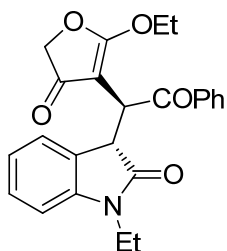

70% yield,  $[\alpha]_D^{20} = +20.7$  (c 1.8, CH<sub>2</sub>Cl<sub>2</sub>); (dr = 1.1:1, 96% ee for the major diastereomer, 94% ee for the minor diastereomer); HPLC conditions: Chiralcel IC column, Hexane/i-PrOH = 50:50, flow rate 0.7 mL/min, UV detection at 220 nm, retention time: major diastereomer: major diastereomer: 32.44 min (major) and 44.41 min (minor), minor diastereomer: 28.24 min (major) and 22.54 min (minor).

<sup>1</sup>H NMR (CDCl<sub>3</sub>, 300 MHz) δ 1.14 (t, *J* = 7.08 Hz, 3H), 1.23 (t, *J* = 6.93 Hz, 3H), 3.70-3.74 (m, 2H), 4.07-4.10 (m, 1H), 4.38-4.40 (m, 3H), 4.58 (d, *J* = 8.10 Hz, 1H), 4.67 (d, *J* = 8.35 Hz, 1H), 6.77 (d, *J* = 7.89 Hz, 1H), 6.82 (t, *J* = 9.51 Hz, 1H), 7.05 (d, *J* = 8.35 Hz, 1H), 7.20 (t, *J* = 7.62 Hz, 1H), 7.39 (d, *J* = 6.48 Hz, 2H), 7.48-7.50 (m, 1H), 7.89 (d, *J* = 7.47 Hz, 1H), 8.02 (d, *J* = 7.53 Hz, 1H); <sup>13</sup>C NMR (CDCl<sub>3</sub>, 75 Hz) δ 12.5, 14.6, 34.5, 42.2, 45.2, 66.6, 75.0, 89.3, 107.9, 121.9, 124.9, 127.2, 127.8, 128.3, 128.8, 133.1, 135.6, 143.1, 175.3, 181.5, 193.9, 195.1; HRMS (ESI) Calcd. for C<sub>24</sub>H<sub>23</sub>NNaO<sub>5</sub> [M+Na]<sup>+</sup>: 428.1474; Found: 428.1474.

**(3S)-1-benzyl-3-[(1S)-1-(2-ethoxy-4-oxo-4,5-dihydrofuran-3-yl)-2-oxo-2-phenyl**

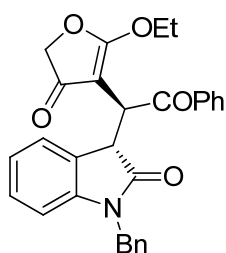

**ethyl]-2,3-dihydro-1H-indol-2-one (5c)**

78% yield,  $[\alpha]_D^{20} = +36.2$  (c 1.6,  $\text{CH}_2\text{Cl}_2$ ); (dr = 19.0:1, 99% ee for the major diastereomer, 94% ee for the minor diastereomer); HPLC conditions: Chiralcel IC column, Hexane/*i*-PrOH = 50:50, flow rate 0.7 mL/min, UV detection at 220 nm, retention time:

major diastereomer: 21.36 min (major) and 19.63 min (minor), minor diastereomer: 25.65 min (major) and 29.40 min (minor).  $^1\text{H}$  NMR ( $\text{CDCl}_3$ , 300 MHz)  $\delta$  1.36 (t,  $J = 7.08$  Hz, 3H), 4.38 (d,  $J = 4.05$  Hz, 1H), 4.50-4.69 (m, 4H), 4.84 (s, 2H), 5.20 (d,  $J = 4.25$  Hz, 1H), 6.68 (t,  $J = 7.02$  Hz, 1H), 6.84 (t,  $J = 7.58$  Hz, 1H), 7.10 (d,  $J = 6.81$  Hz, 2H), 7.24-7.33 (m, 5H), 7.38-7.43 (m, 2H), 7.92 (d,  $J = 7.29$  Hz, 1H), 8.05 (d,  $J = 7.32$  Hz, 2H);  $^{13}\text{C}$  NMR ( $\text{CDCl}_3$ , 75 Hz)  $\delta$  14.6, 29.6, 42.6, 45.2, 66.6, 75.0, 89.3, 108.7, 122.1, 124.8, 125.8, 127.3, 127.8, 128.1, 128.3, 128.5, 128.6, 132.8, 133.1, 135.8, 143.1, 175.8, 181.4, 193.8, 195.0; HRMS (ESI) Calcd. for  $\text{C}_{29}\text{H}_{25}\text{NNaO}_5$   $[\text{M}+\text{Na}]^+$ : 490.1630; Found: 490.1631.

**(3S)-3-[(1S)-1-(2-ethoxy-4-oxo-4,5-dihydrofuran-3-yl)-2-oxopropyl]-1-methyl-2,**

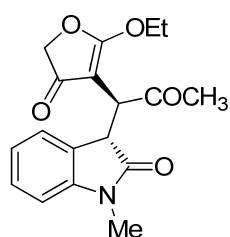

**3-dihydro-1H-indol-2-one(5d)**

75% yield,  $[\alpha]_D^{20} = +15.2$  (c 1.5,  $\text{CH}_2\text{Cl}_2$ ); (dr = 1.6:1, 91% ee for the major diastereomer, 89% ee for the minor diastereomer); HPLC conditions: Chiralcel AD-H column, Hexane/*i*-PrOH = 80:20, flow rate 1.0 mL/min, UV detection at 220 nm, retention

time: major diastereomer: 10.30 min (major) and 11.88 min (minor), minor diastereomer: 9.10 min (major) and 13.09 min (minor).  $^1\text{H}$  NMR ( $\text{CDCl}_3$ , 300 MHz)  $\delta$  1.35 (t,  $J = 7.11$  Hz, 3H), 2.12 (s, 3H), 3.15 (s, 3H), 3.79 (d,  $J = 9.45$  Hz, 1H), 4.28-4.33 (m, 2H), 4.44 (d,  $J = 4.44$  Hz, 2H), 4.69 (d,  $J = 2.97$  Hz, 1H), 6.73 (d,  $J = 7.53$  Hz, 1H), 6.94-6.97 (m, 2H), 7.09 (d,  $J = 7.35$  Hz, 1H);  $^{13}\text{C}$  NMR ( $\text{CDCl}_3$ , 75 Hz)  $\delta$  14.7, 28.7, 29.7, 44.8, 47.9, 53.4, 66.8, 75.2, 107.3, 122.2, 124.5, 125.8, 127.9, 144.6, 176.7, 181.8, 194.4, 204.8; HRMS (ESI) Calcd. for  $\text{C}_{18}\text{H}_{19}\text{NNaO}_5$   $[\text{M}+\text{Na}]^+$ : 352.1161; Found: 352.1161.

**Ethyl (2S)-2-(2-ethoxy-4-oxo-4,5-dihydrofuran-3-yl)-2-[(3S)-1-methyl-2-oxo-2,3-**

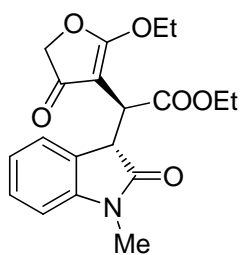

**dihydro-1H-indol-3-yl] acetate (5e)**

73% yield,  $[\alpha]_D^{20} = +23.4$  (c 0.8,  $\text{CH}_2\text{Cl}_2$ ); (dr = 1.2:1, >99% ee for the major diastereomer, >99% ee for the minor diastereomer); HPLC conditions: Chiralcel AD-H column, Hexane/i-PrOH = 80:20, flow rate 1.0 mL/min, UV detection at 220 nm, retention

time: major diastereomer: 9.91 min (major), minor diastereomer: 12.73 min (major).  $^1\text{H}$  NMR ( $\text{CDCl}_3$ , 300 MHz)  $\delta$  1.09 (t,  $J = 7.14$  Hz, 3H), 1.38 (t,  $J = 7.11$  Hz, 3H), 3.16 (s, 3H), 3.99-4.17 (m, 4H), 4.18-4.23 (m, 1H), 4.43-4.46 (m, 2H), 4.62 (s, 1H), 6.72-6.80 (m, 1H), 6.96 (t,  $J = 7.53$  Hz, 1H), 7.20-7.32 (m, 2H);  $^{13}\text{C}$  NMR ( $\text{CDCl}_3$ , 75 Hz)  $\delta$  13.8, 14.7, 26.2, 39.2, 44.5, 53.4, 61.0, 66.5, 75.0, 107.7, 122.1, 124.5, 127.2, 128.8, 144.5, 170.2, 175.6, 181.4, 194.1; HRMS (ESI) Calcd. for  $\text{C}_{19}\text{H}_{21}\text{NNaO}_6$   $[\text{M}+\text{Na}]^+$ : 382.1267; Found: 382.1270.

**(3S)-3-[(1S)-2-(4-chlorophenyl)-1-(2-ethoxy-4-oxo-4,5-dihydrofuran-3-yl)-2-oxoethyl]-1-methyl-2,3-dihydro-1H-indol-2-one(5f)**

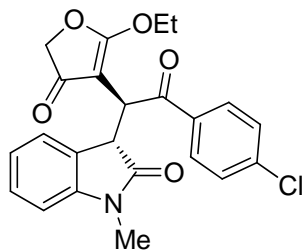

68% yield,  $[\alpha]_D^{20} = +67.5$  (c 1.2,  $\text{CH}_2\text{Cl}_2$ ); (dr = 1.5:1, >99% ee for the major diastereomer, 96% ee for the minor diastereomer); HPLC conditions: Chiralcel AD-H column, EtOH/Hexane = 30:70, flow rate 1.0 mL/min, UV

detection at 254 nm, retention time: major diastereomer: 20.34 min (major) and 21.69 min (minor), minor diastereomer: 24.79 min (major) and 30.05 min (minor).  $^1\text{H}$  NMR ( $\text{CDCl}_3$ , 300 MHz)  $\delta$  1.36 (t,  $J = 7.11$  Hz, 3H), 3.15 (s, 3H), 4.15-4.19 (m, 2H), 4.38-4.43 (m, 2H), 4.71 (d,  $J = 16.02$  Hz, 1H), 4.95 (d,  $J = 3.87$  Hz, 1H), 6.79 (t,  $J = 8.55$  Hz, 1H), 7.01 (d,  $J = 7.44$  Hz, 1H), 7.33-7.37 (m, 4H), 7.97 (d,  $J = 8.52$  Hz, 2H);  $^{13}\text{C}$  NMR ( $\text{CDCl}_3$ , 75 Hz)  $\delta$  14.6, 26.1, 42.3, 45.1, 66.8, 75.1, 89.0, 107.8, 122.2, 124.7, 126.8, 128.0, 128.4, 128.8, 134.0, 139.7, 144.1, 175.5, 181.7, 193.8, 195.6; HRMS (ESI) Calcd. for  $\text{C}_{23}\text{H}_{20}\text{ClNNaO}_5$   $[\text{M}+\text{Na}]^+$ : 448.0928; Found: 448.0927.

**6. References**

- 1 E. M. Beccalli and A. Marchesini, *Tetrahedron*, 1993, **49**, 4741.
- 2 B. Tan, N. R. Candeias and C. F. Barbas, *J. Am. Chem. Soc.*, 2012, **133**, 4672.
- 3 H. Y. Choi and D. Y. Chi, *Org. Lett.*, 2003, **5**, 411.



4 S. W. Wei, D. A. Yalalov, S. B. Tsogoeva and S. Schmatz, *Catalysis Today*, 2007, **121**, 151.

5 (a) B. Vakulya, A. Varga, S. Csámpai and T. Soós, *Org. Lett.*, 2005, **7**, 1967; (b) S. H. McCooey and S. J. Connon, *Angew. Chem. Int. Ed.*, 2005, **44**, 6367.

## 7. NMR Spectra

### $^1\text{H}$ and $^{13}\text{C}$ NMR of 4a

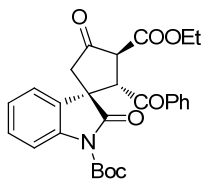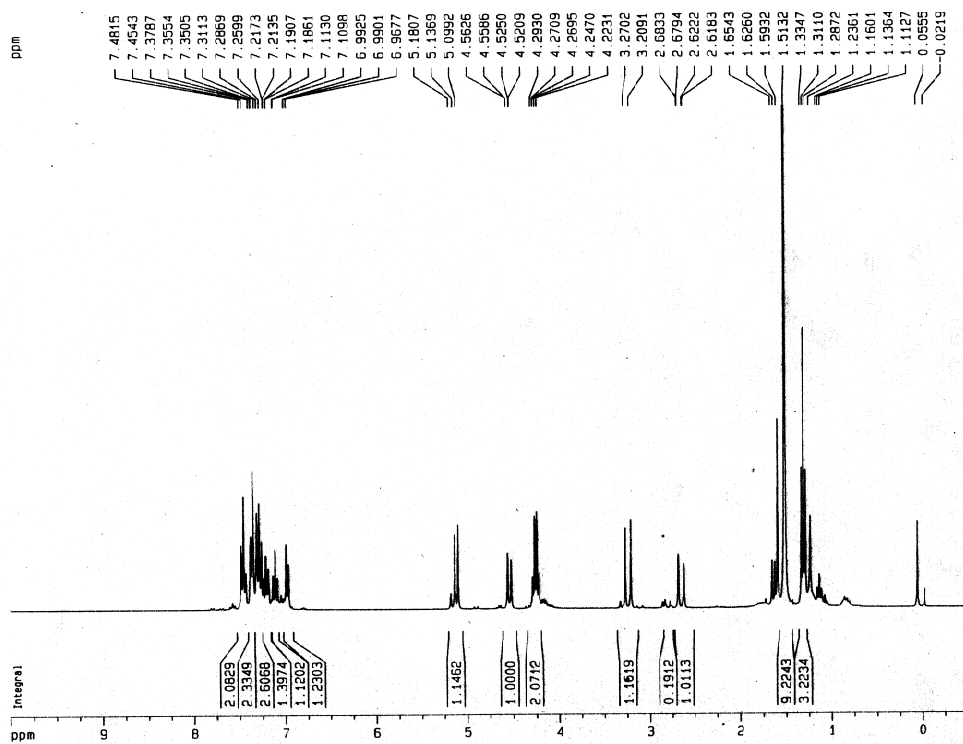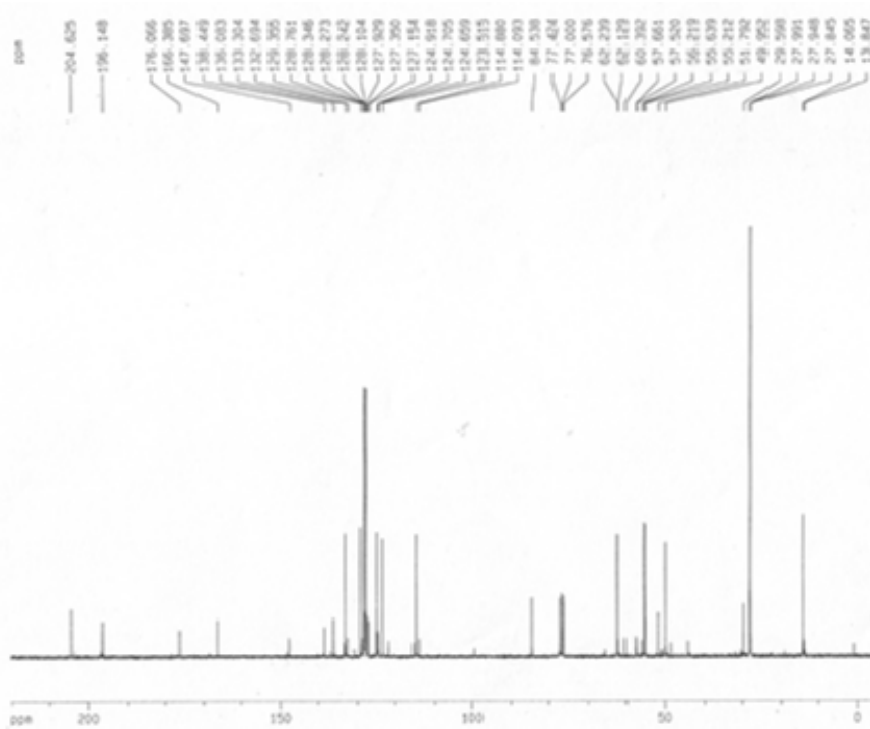

<sup>1</sup>H and <sup>13</sup>C NMR of 4b

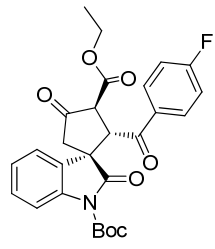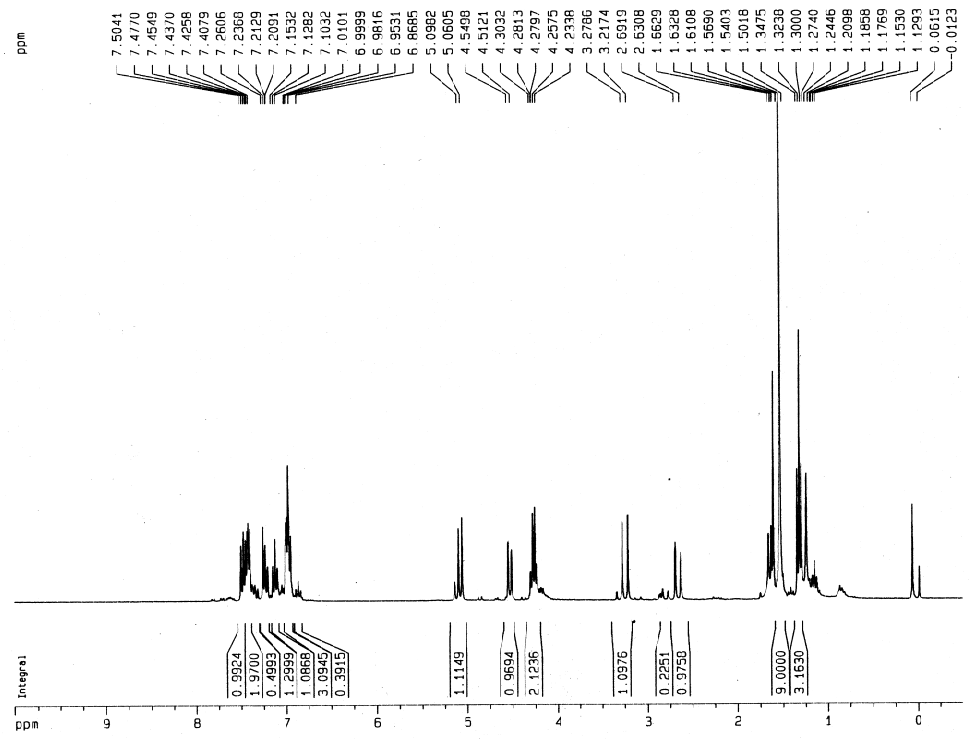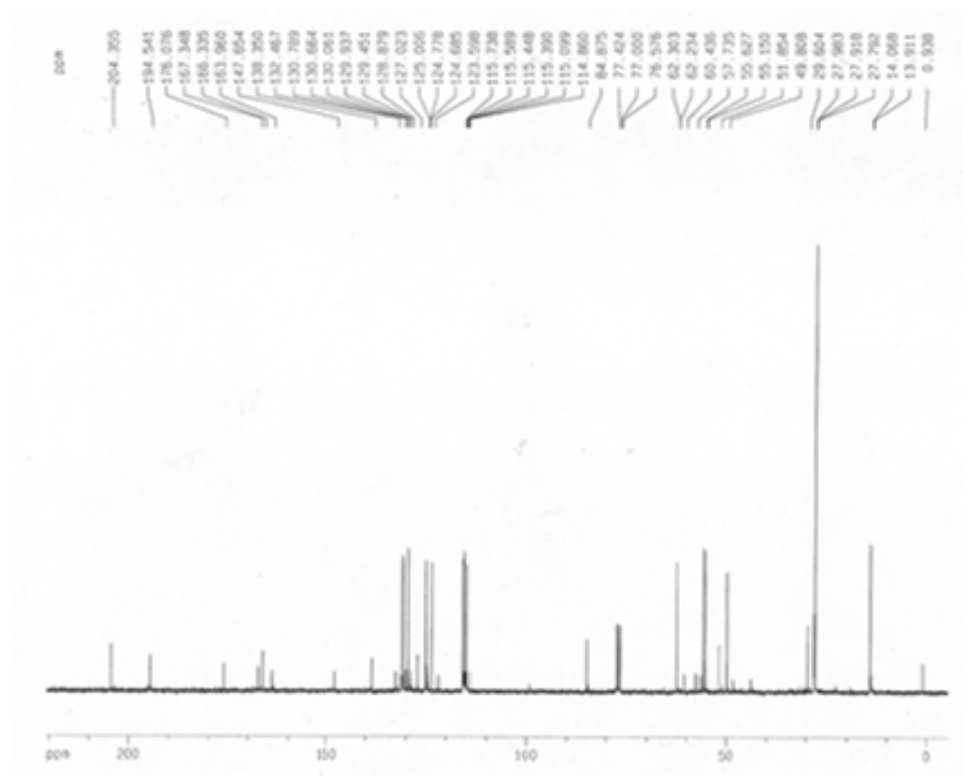

# <sup>1</sup>H and <sup>13</sup>C NMR of 4c

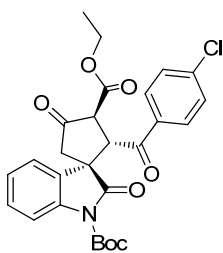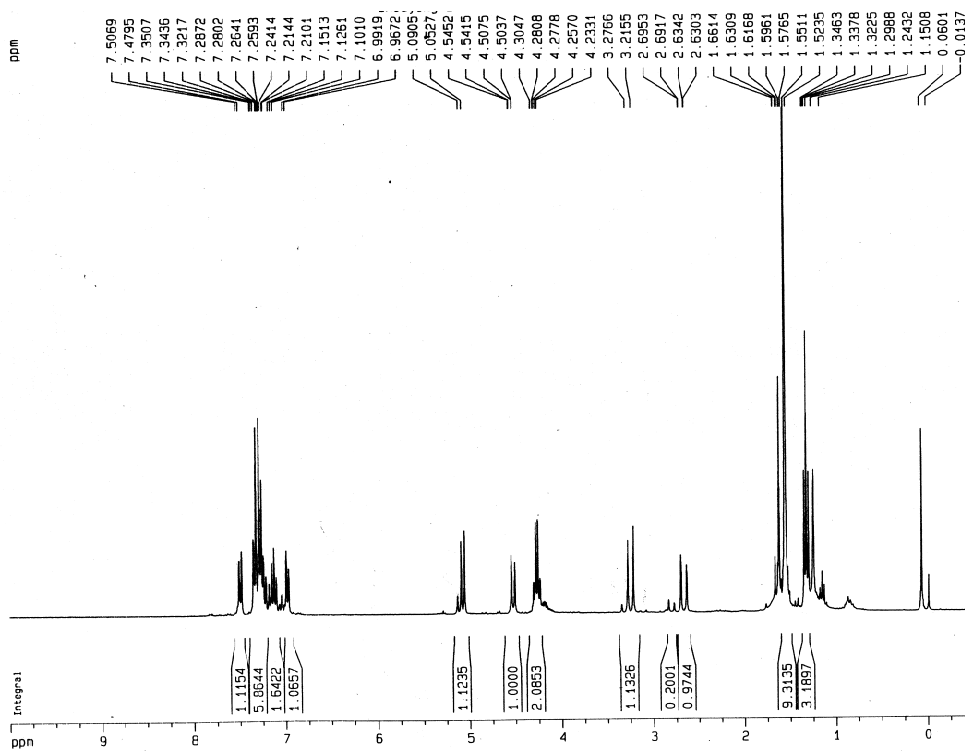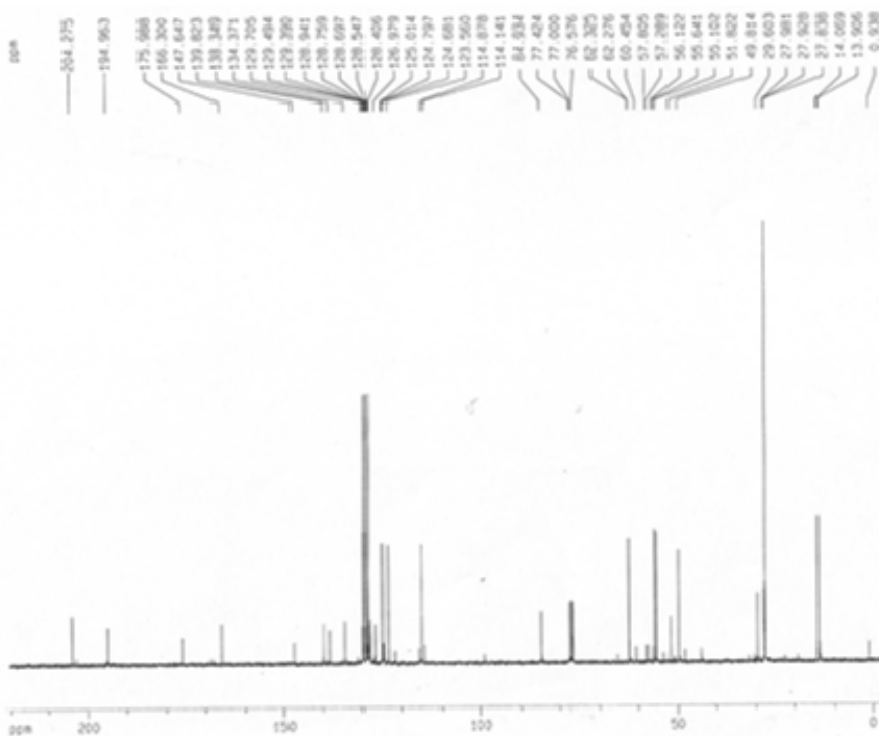

# $^1\text{H}$ and $^{13}\text{C}$ NMR of 4d

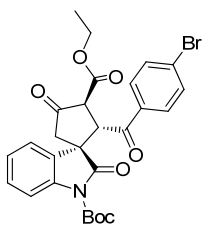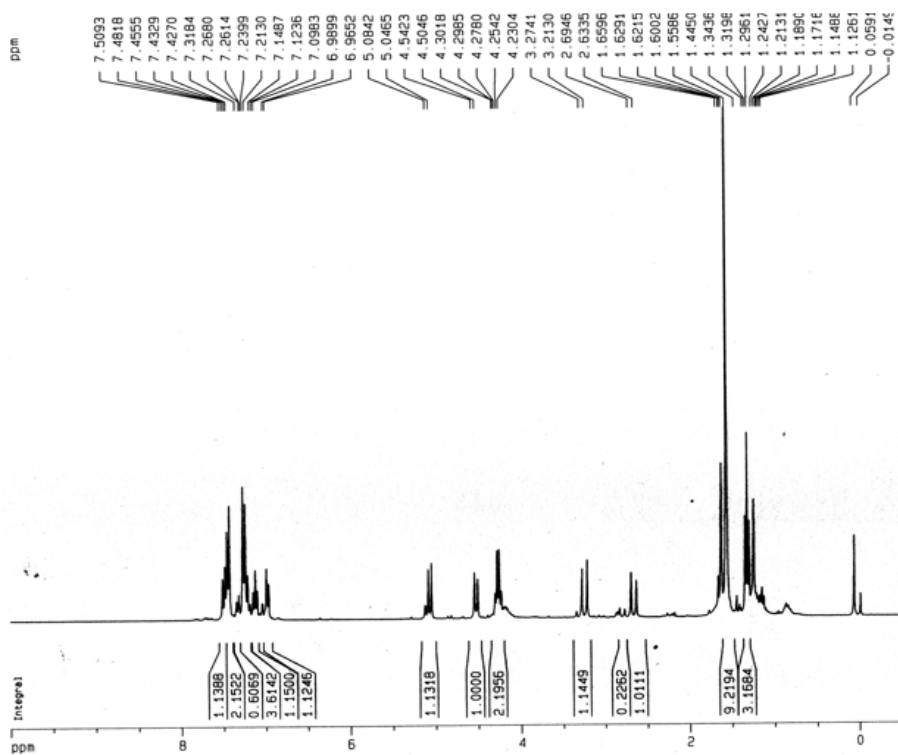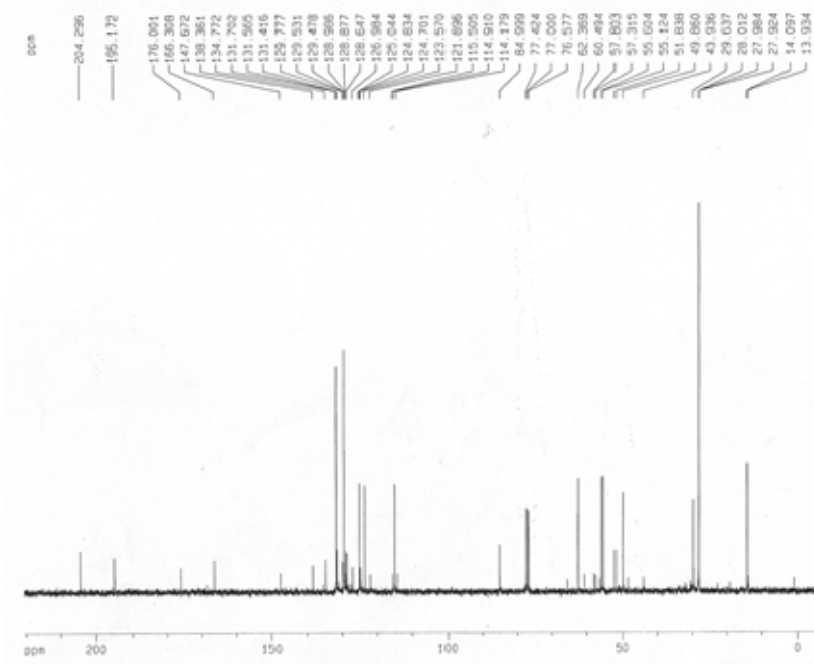

# <sup>1</sup>H and <sup>13</sup>C NMR of 4e

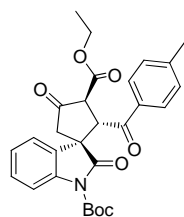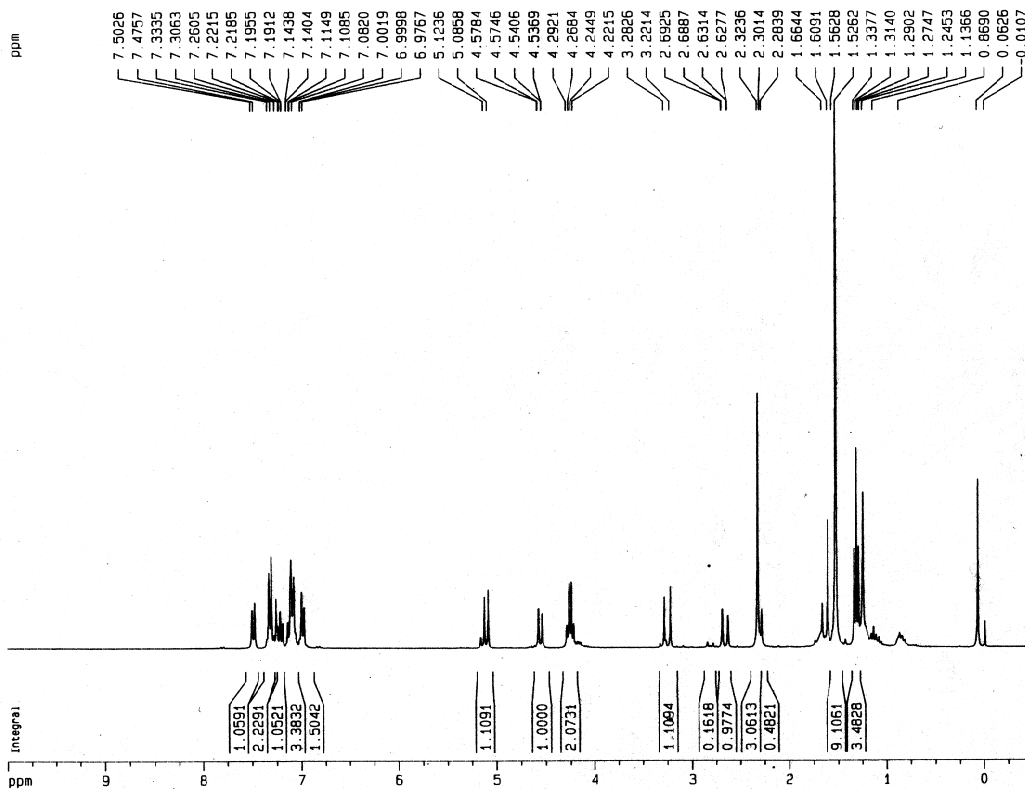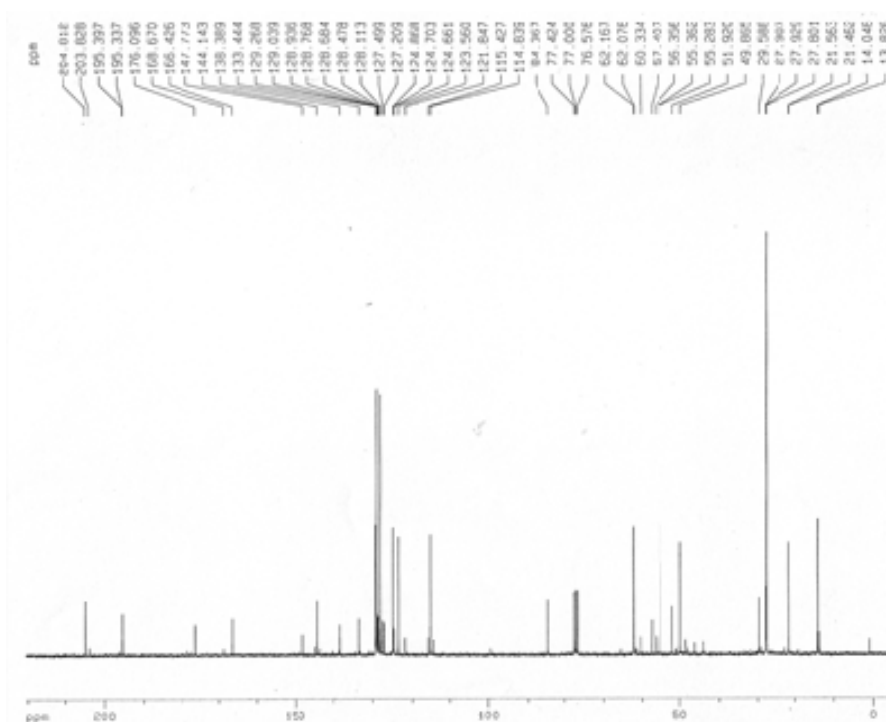

# <sup>1</sup>H and <sup>13</sup>C NMR of 4f

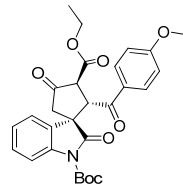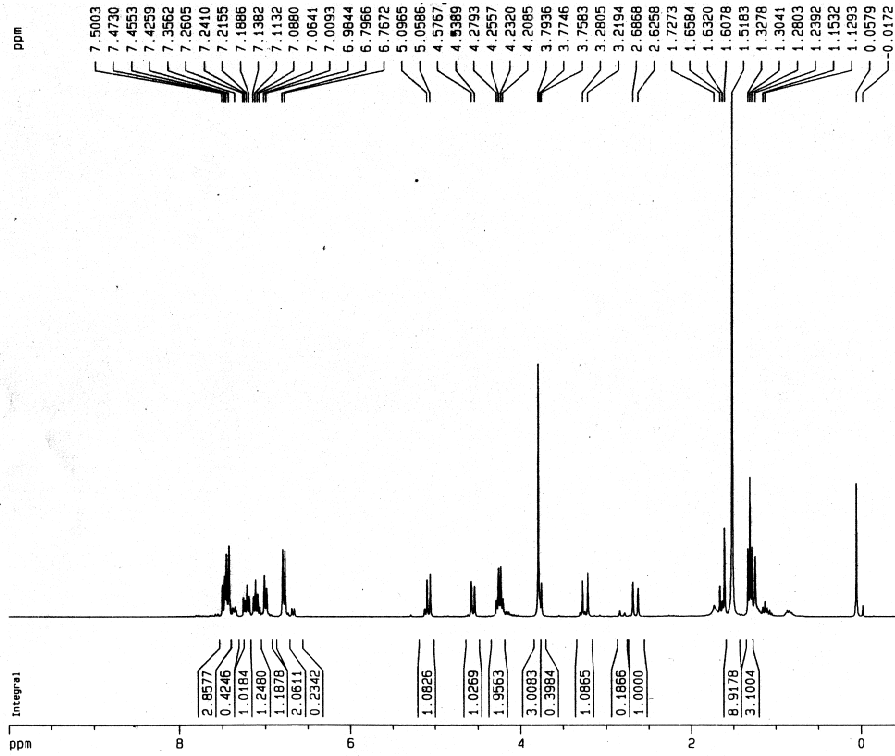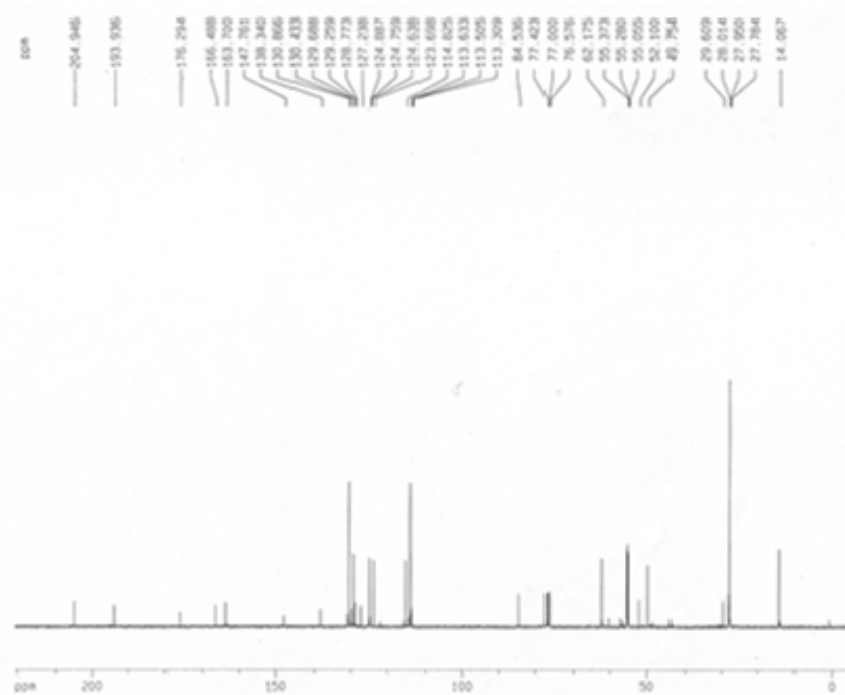

# <sup>1</sup>H and <sup>13</sup>C NMR of 4g

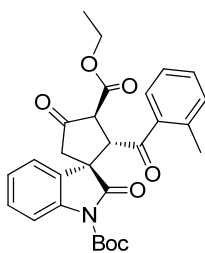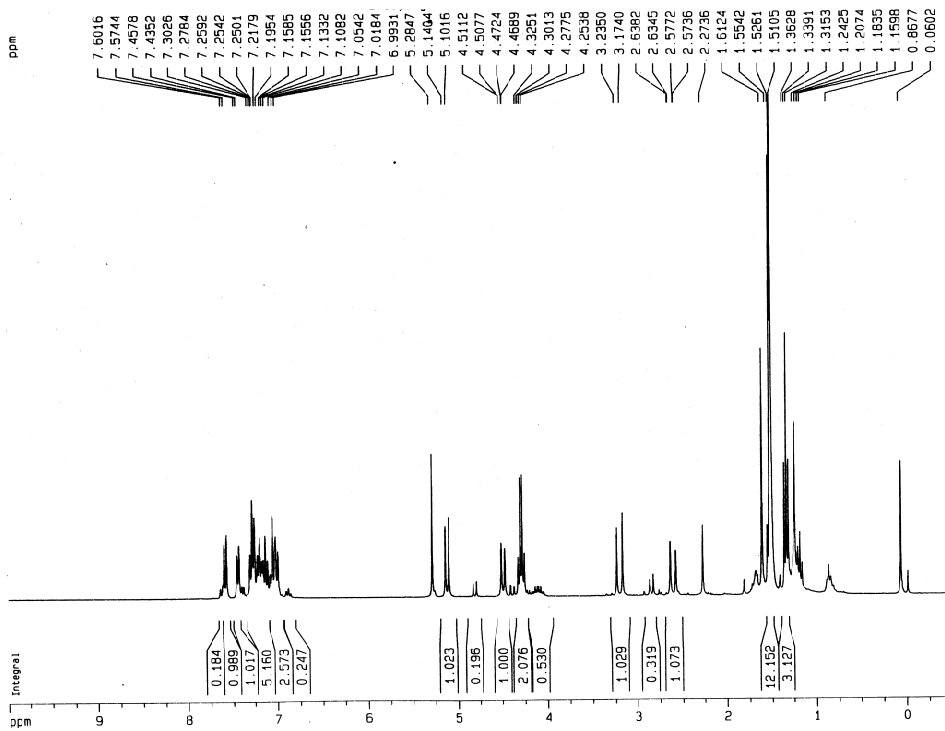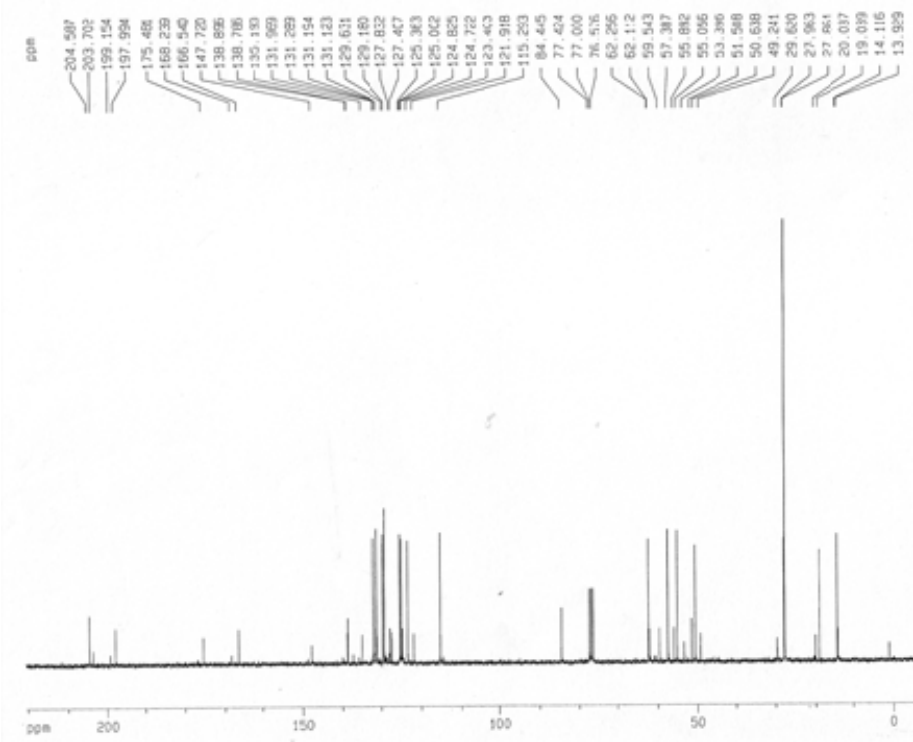



# <sup>1</sup>H and <sup>13</sup>C NMR of 4h

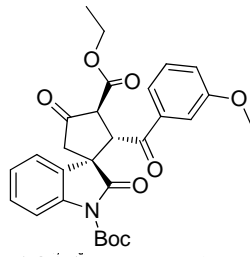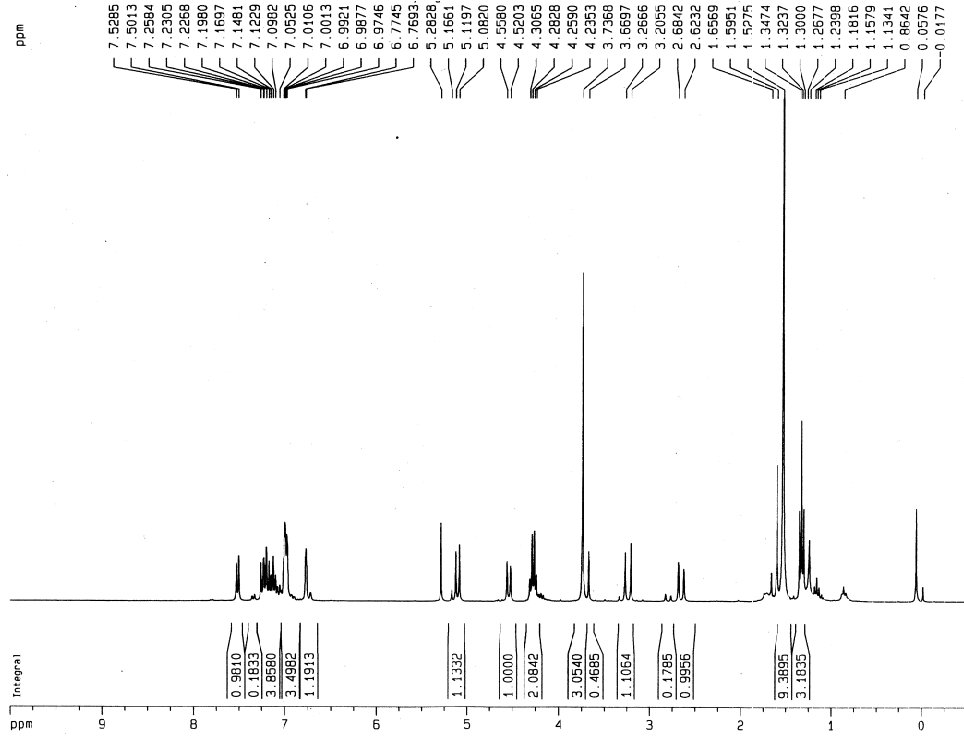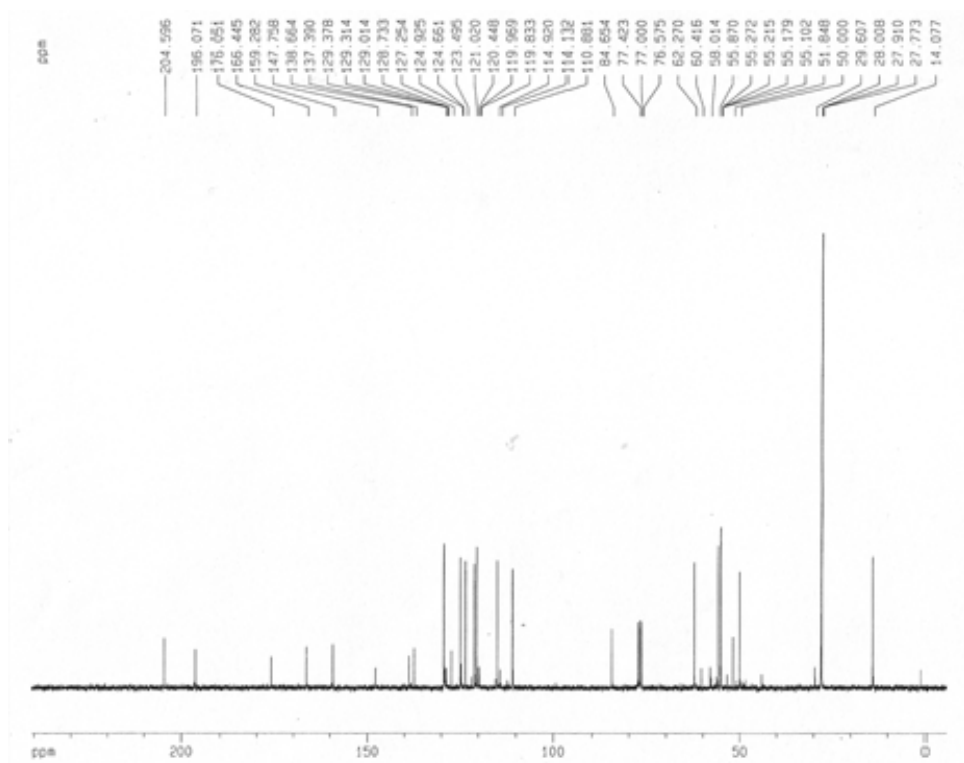

# <sup>1</sup>H and <sup>13</sup>C NMR of 4i

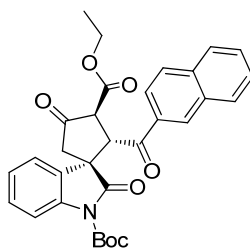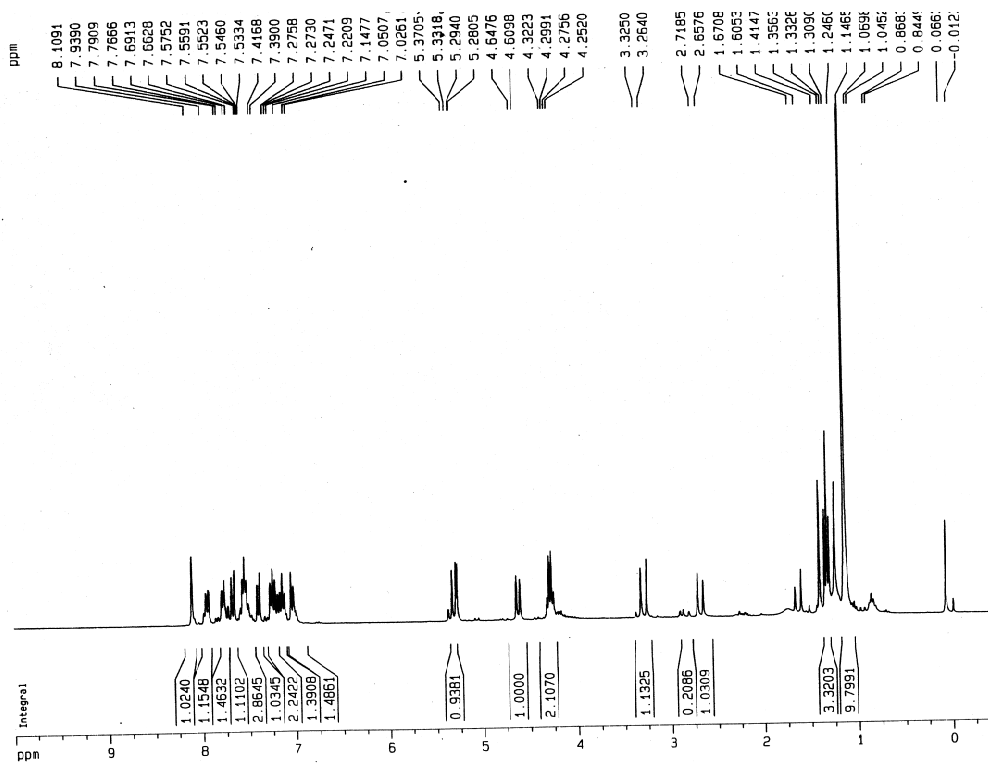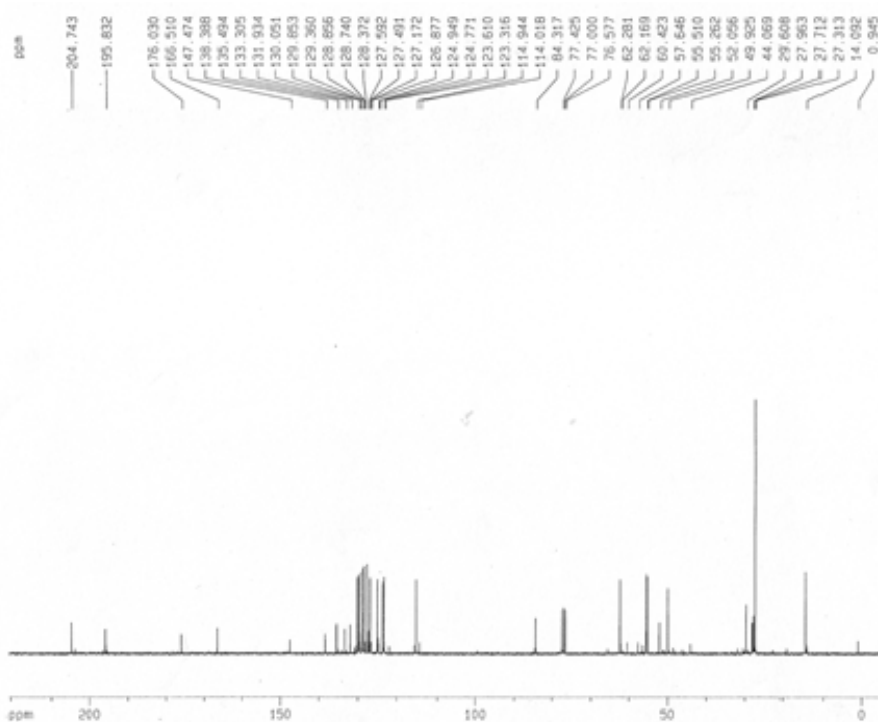

# <sup>1</sup>H and <sup>13</sup>C NMR of 4j

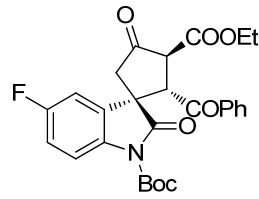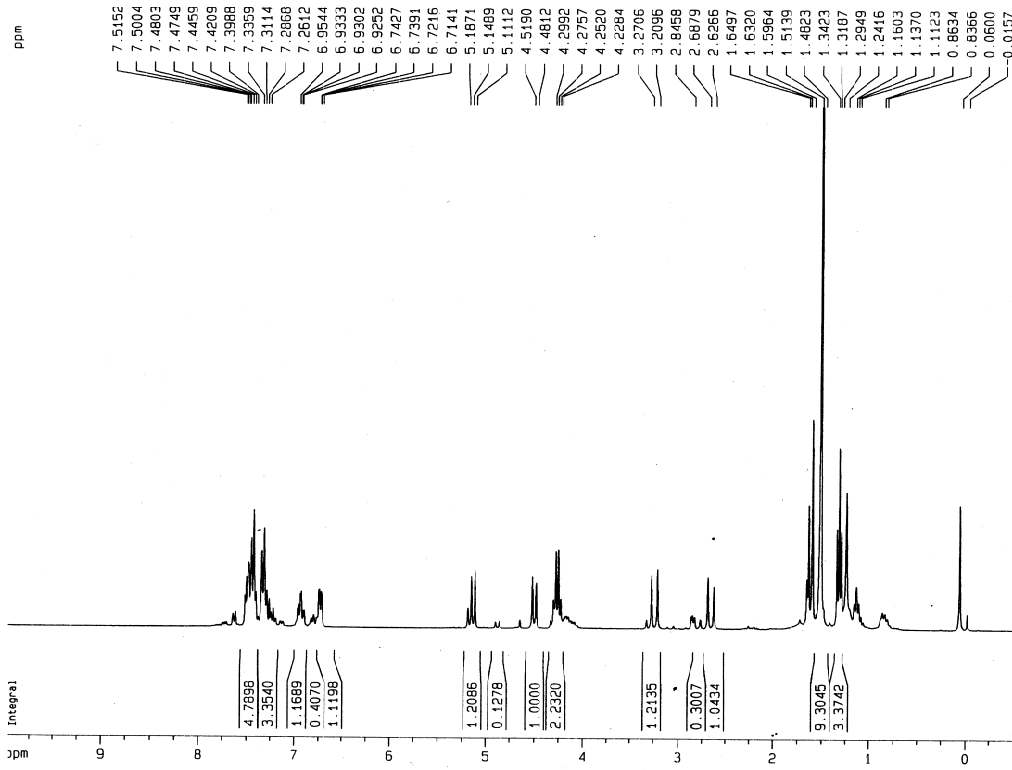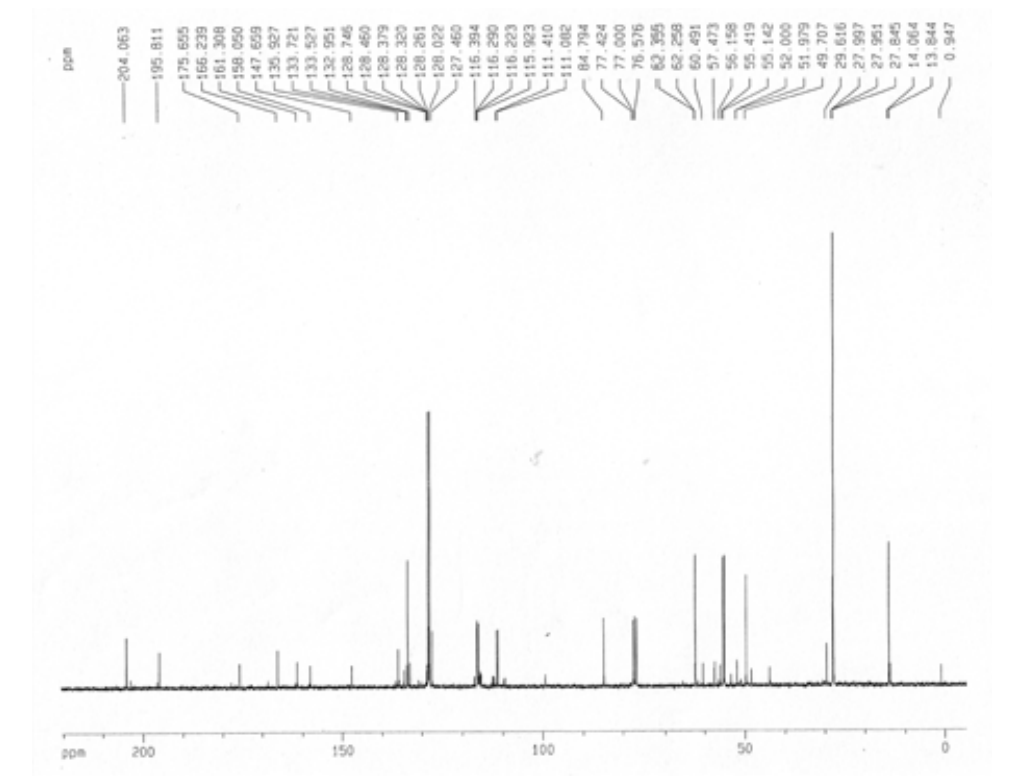

# <sup>1</sup>H and <sup>13</sup>C NMR of 4k

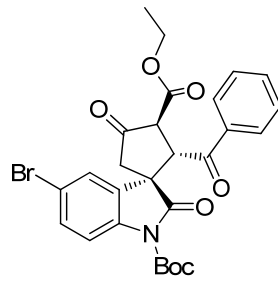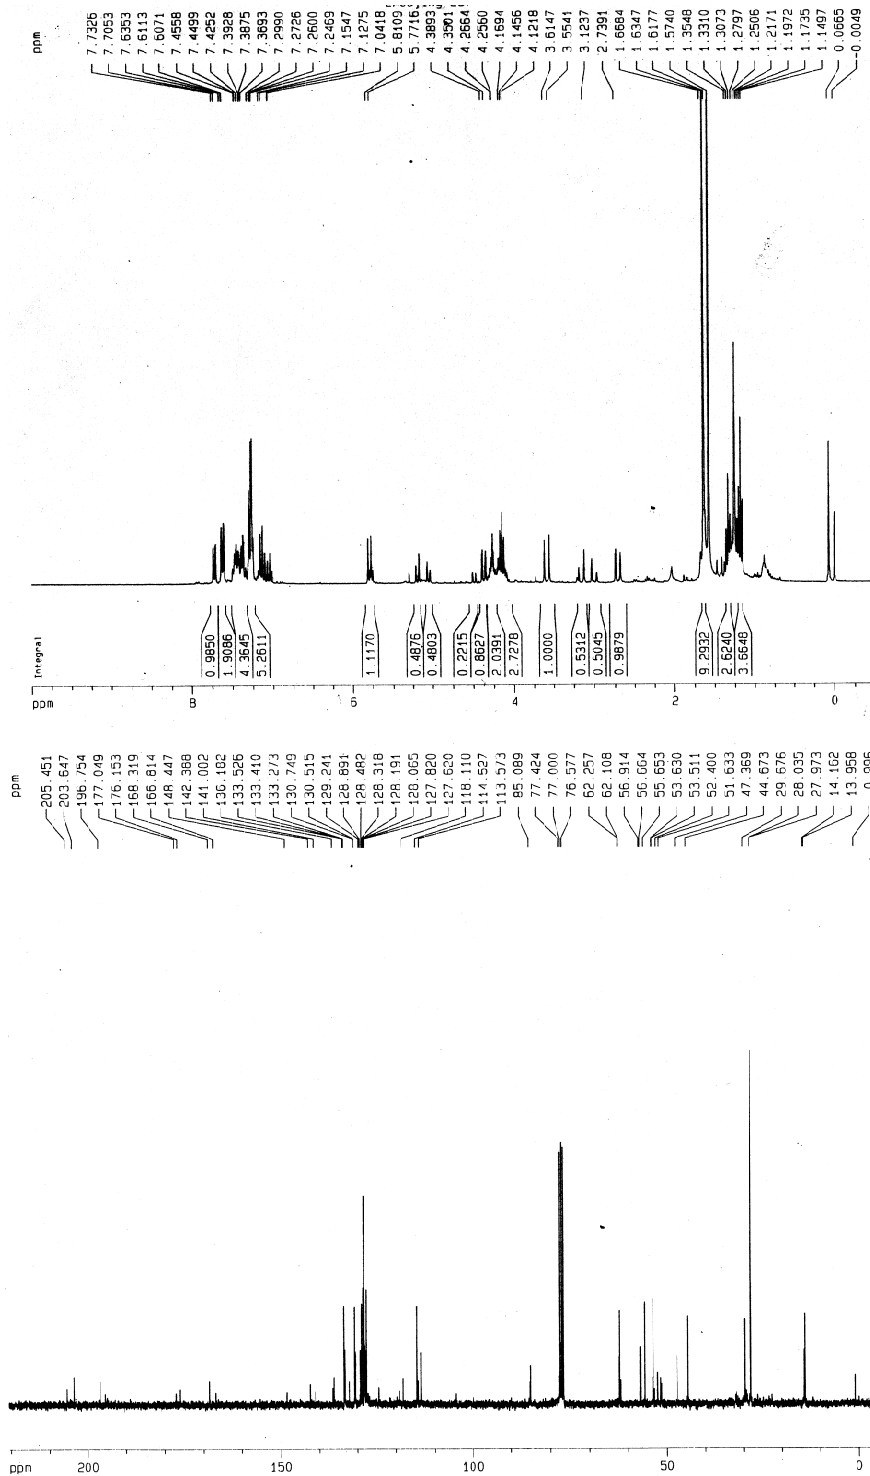

# <sup>1</sup>H and <sup>13</sup>C NMR of 4l

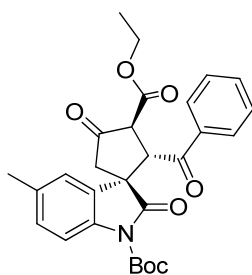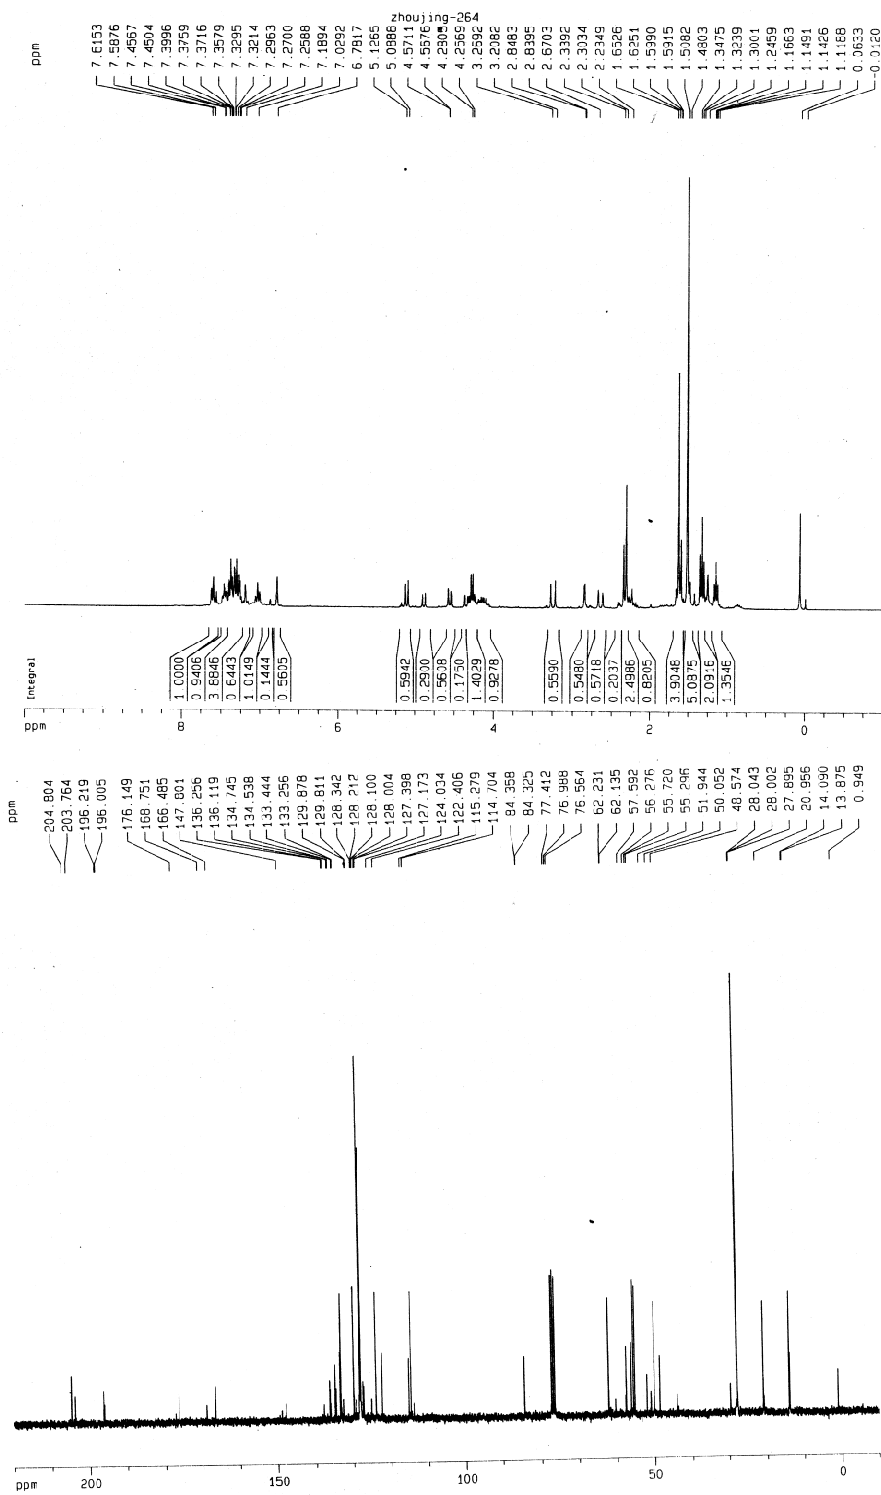

# <sup>1</sup>H and <sup>13</sup>C NMR of 4m

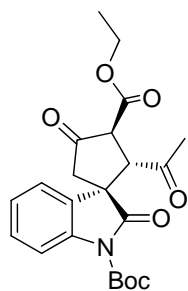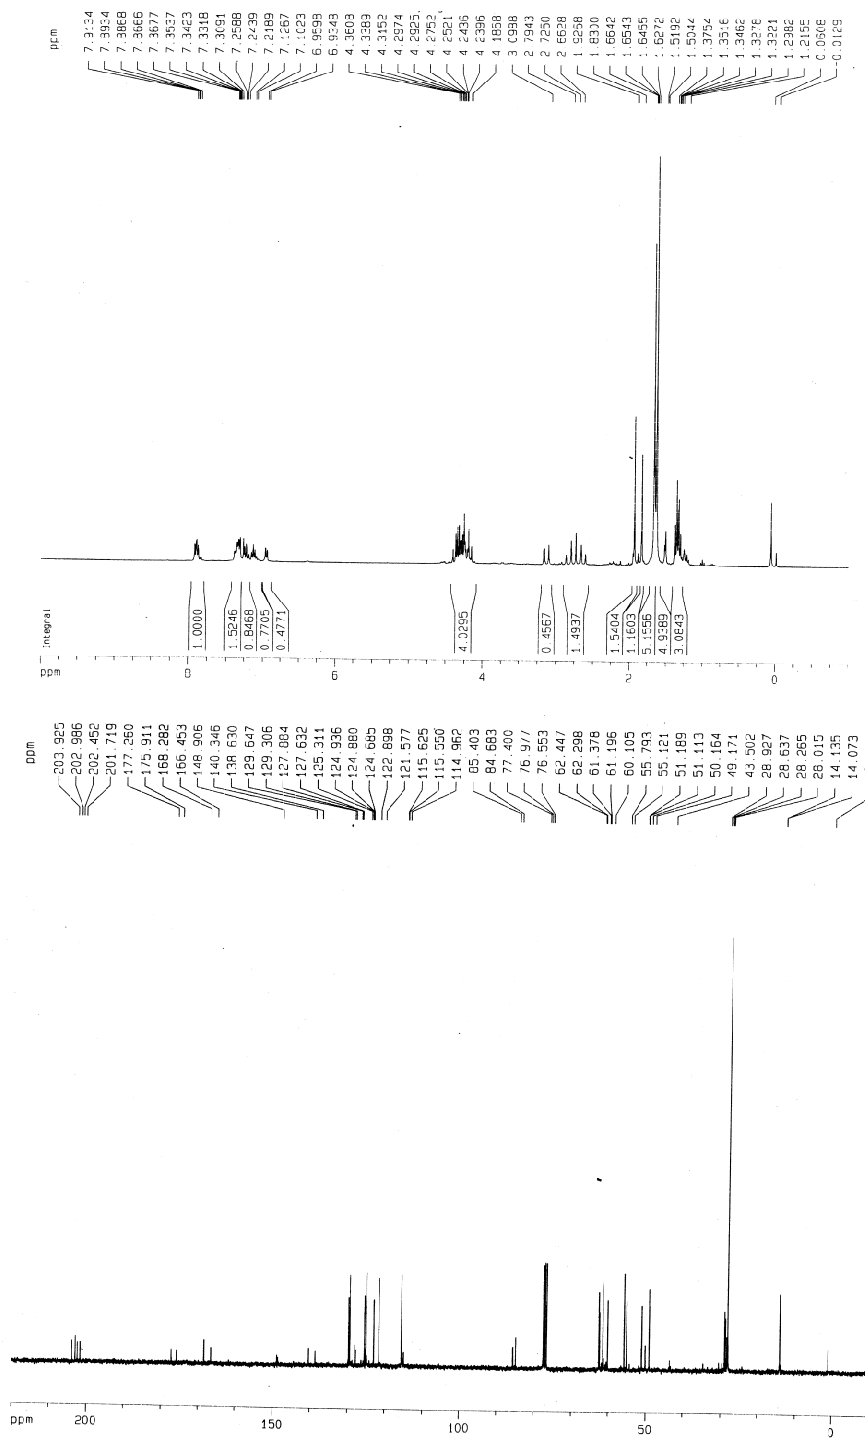

# <sup>1</sup>H and <sup>13</sup>C NMR of 4n

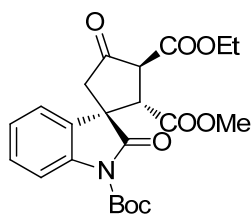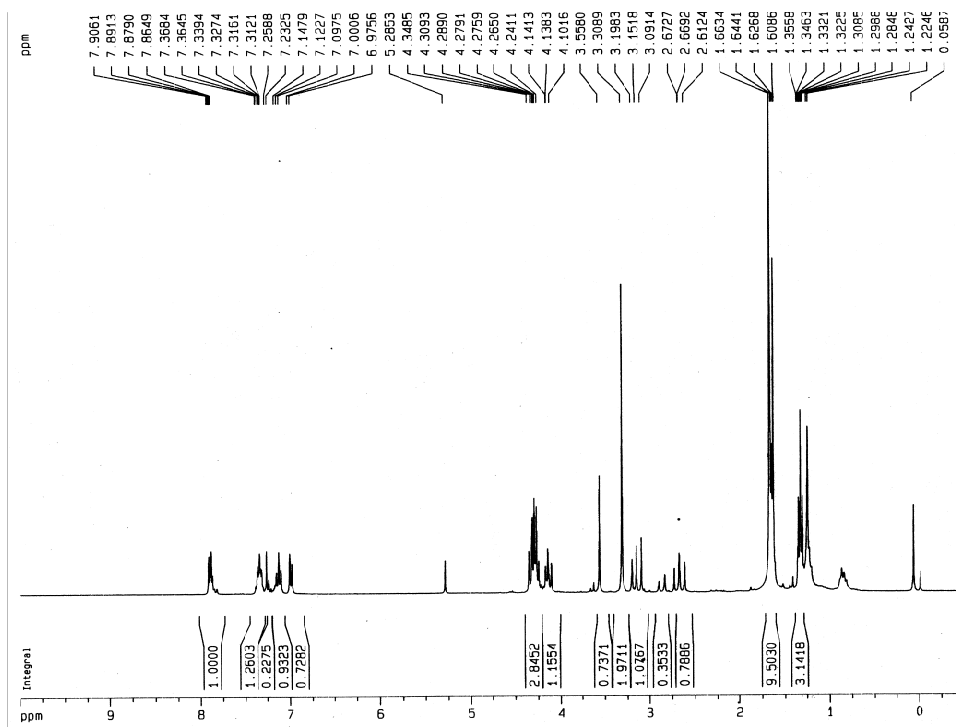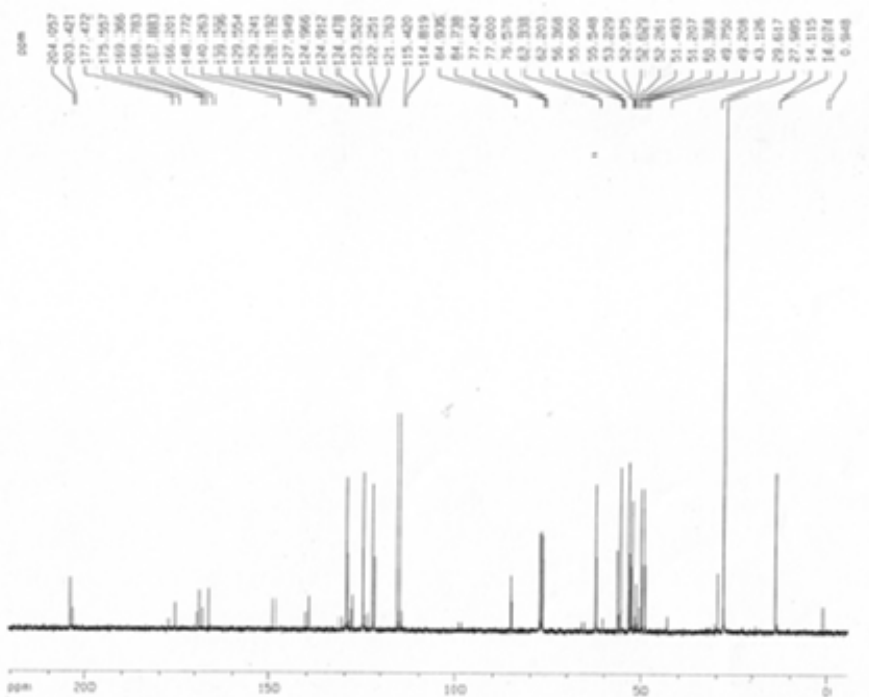

# <sup>1</sup>H and <sup>13</sup>C NMR of 4o

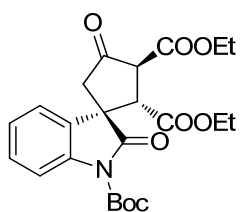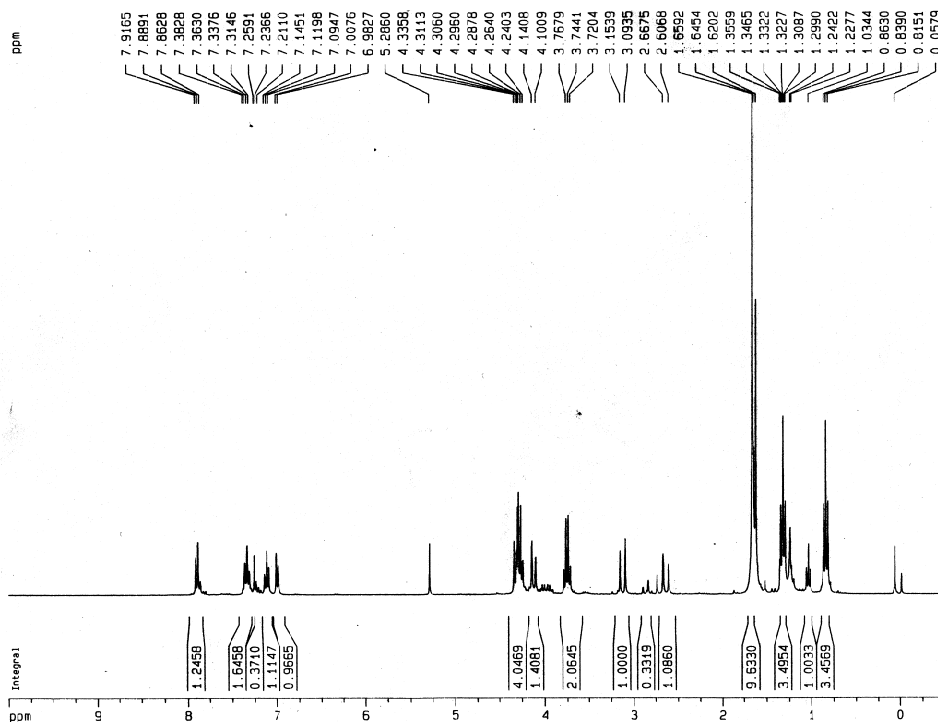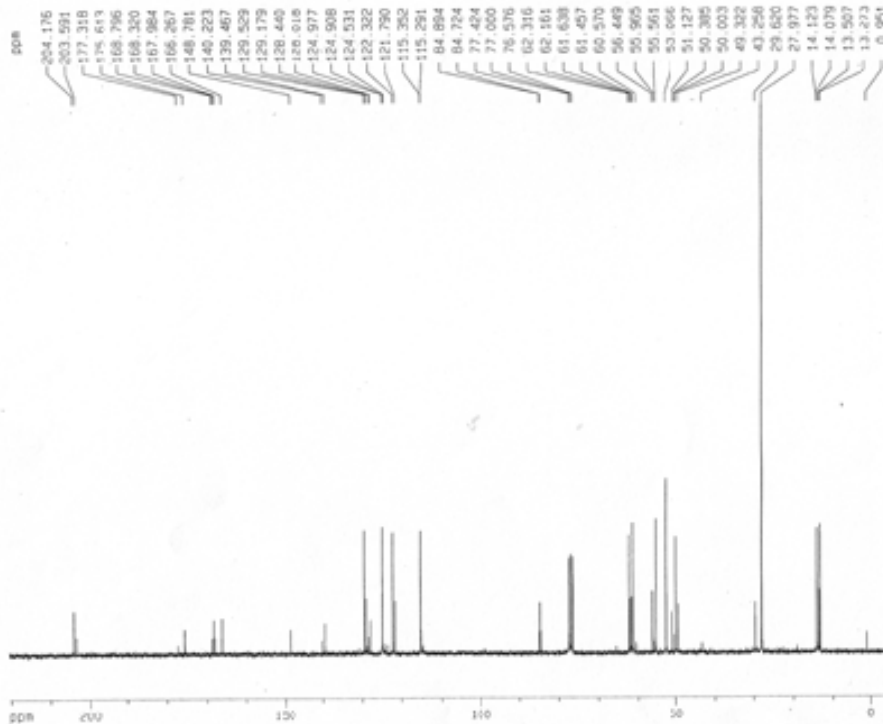



# <sup>1</sup>H and <sup>13</sup>C NMR of 4p

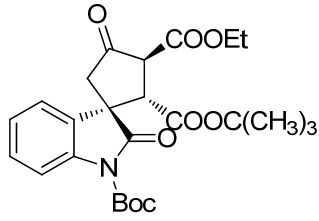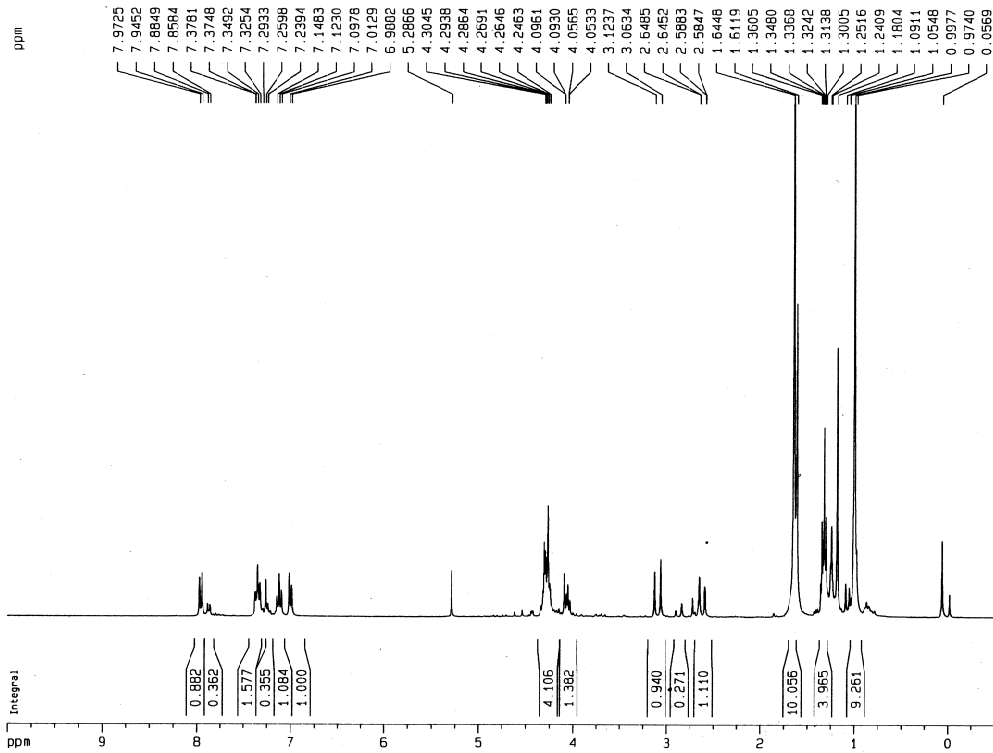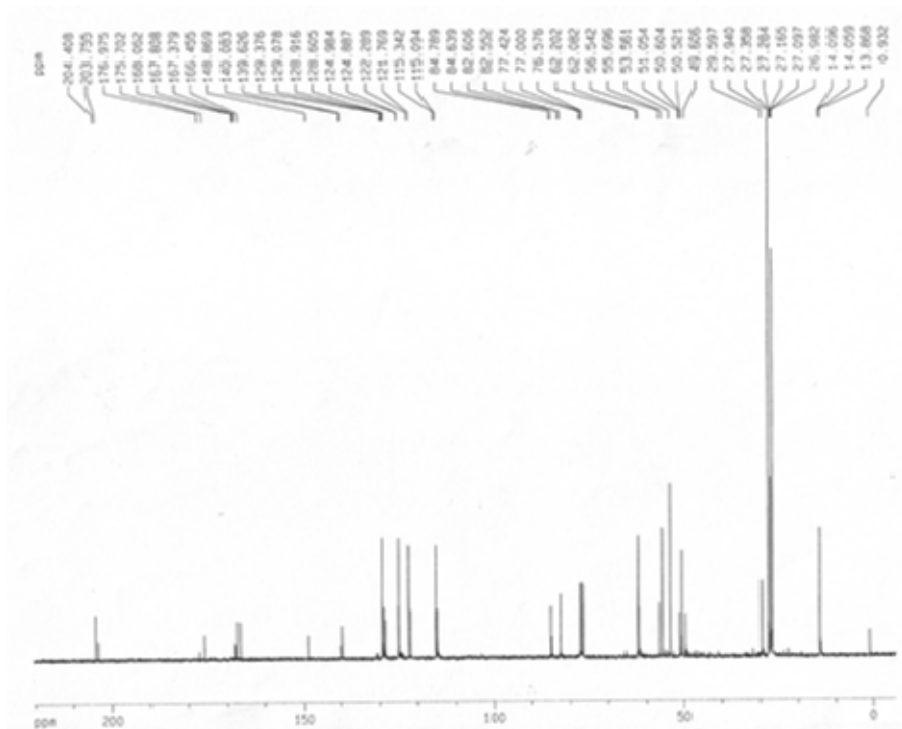

# <sup>1</sup>H and <sup>13</sup>C NMR of 4q

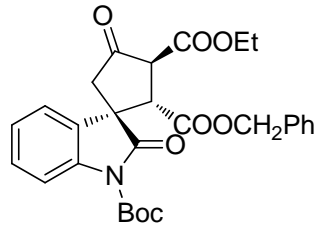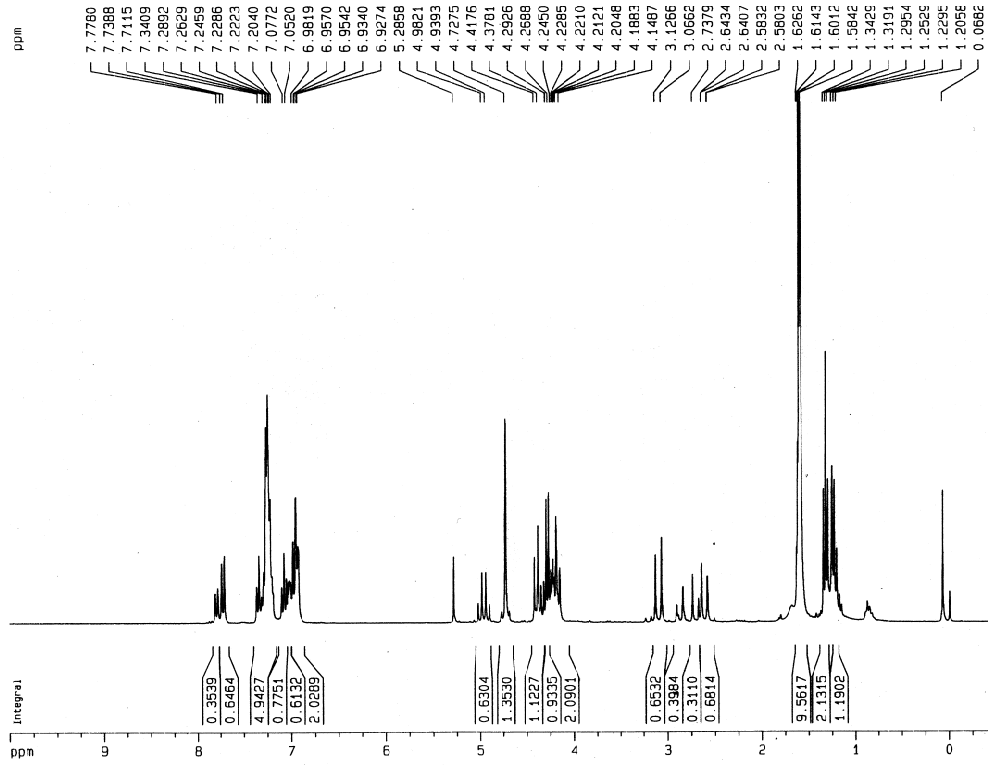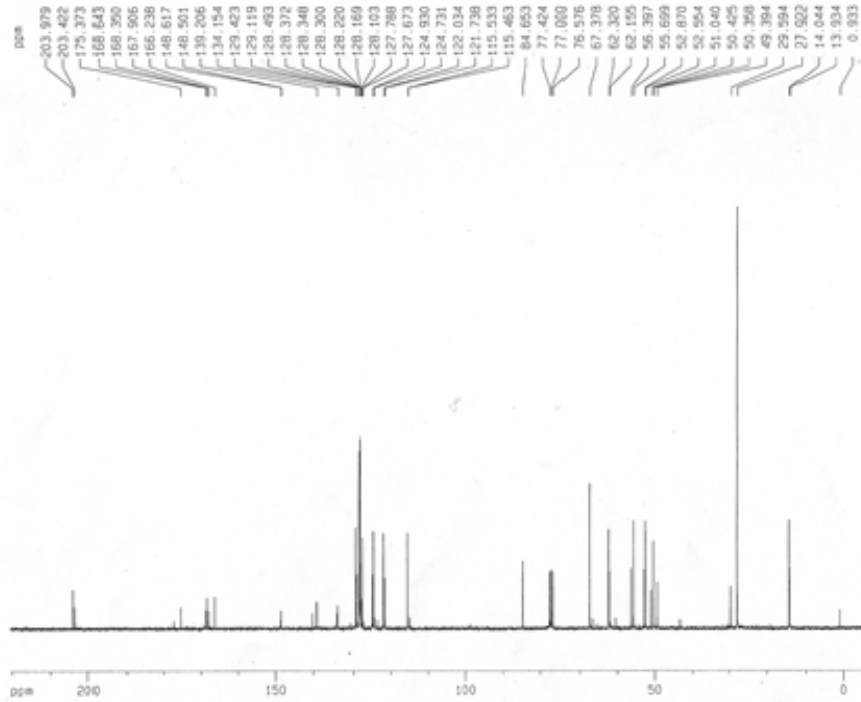

<sup>1</sup>H and <sup>13</sup>C NMR of 4r

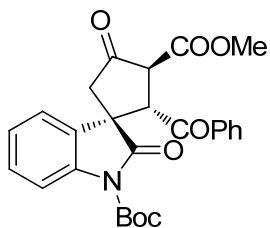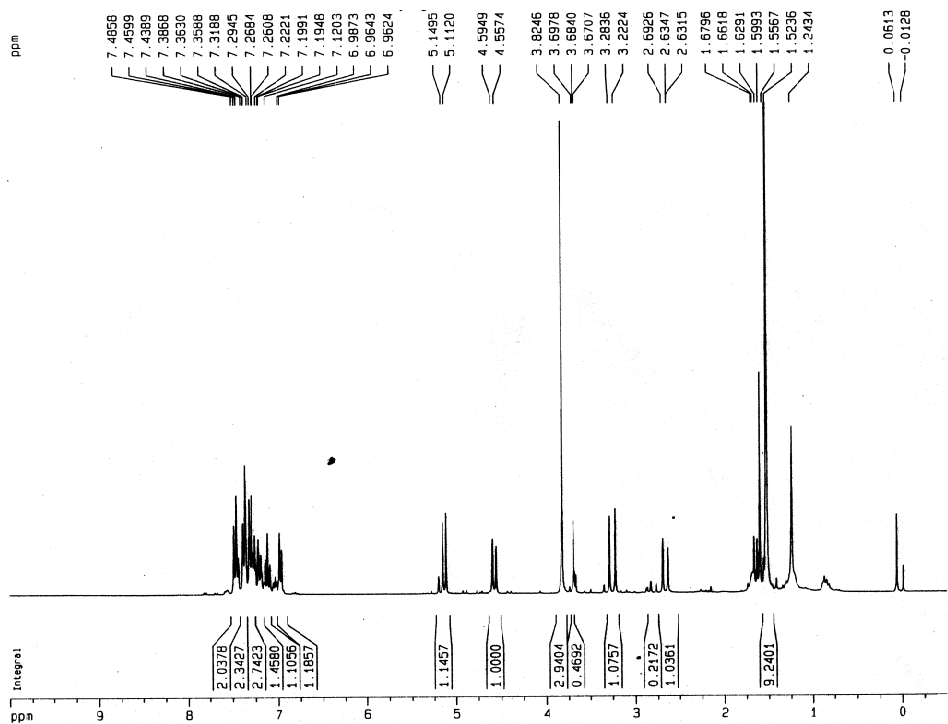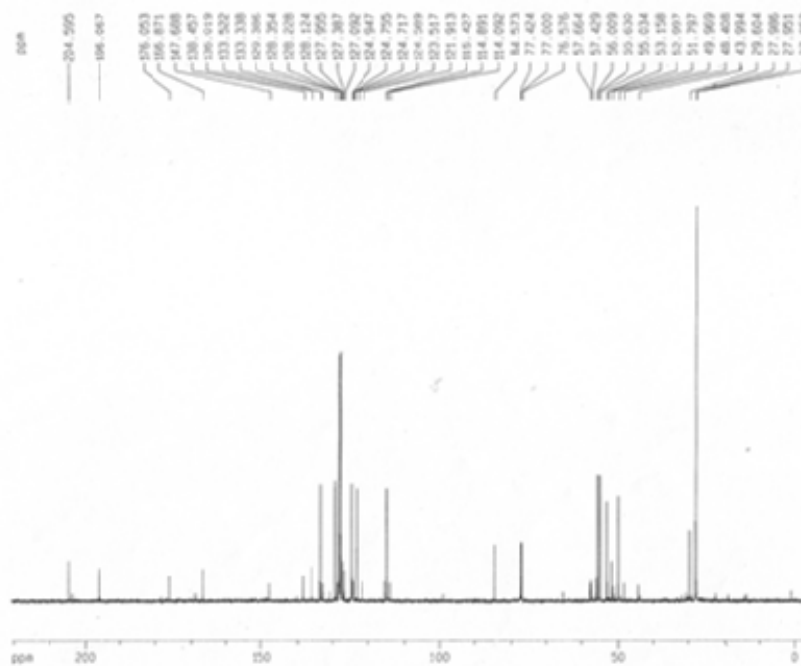

# <sup>1</sup>H and <sup>13</sup>C NMR of 4s

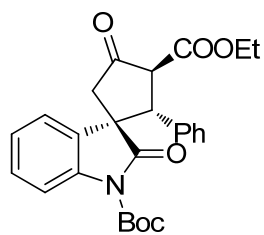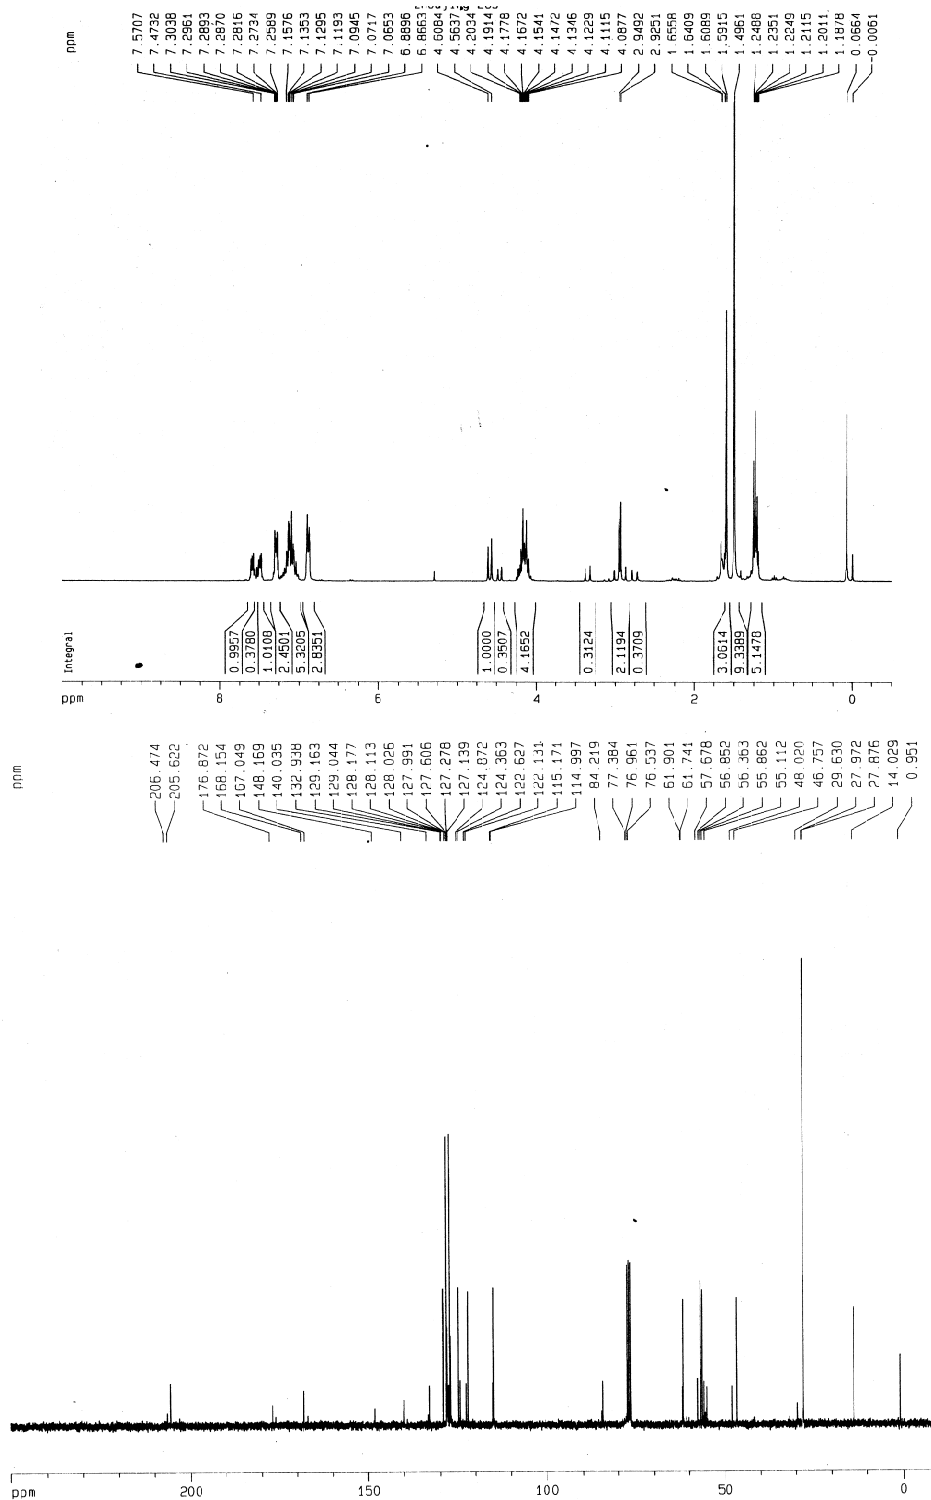

<sup>1</sup>H and <sup>13</sup>C NMR of 4t

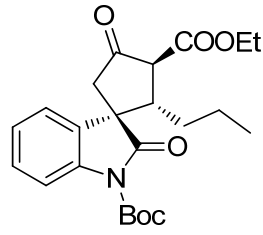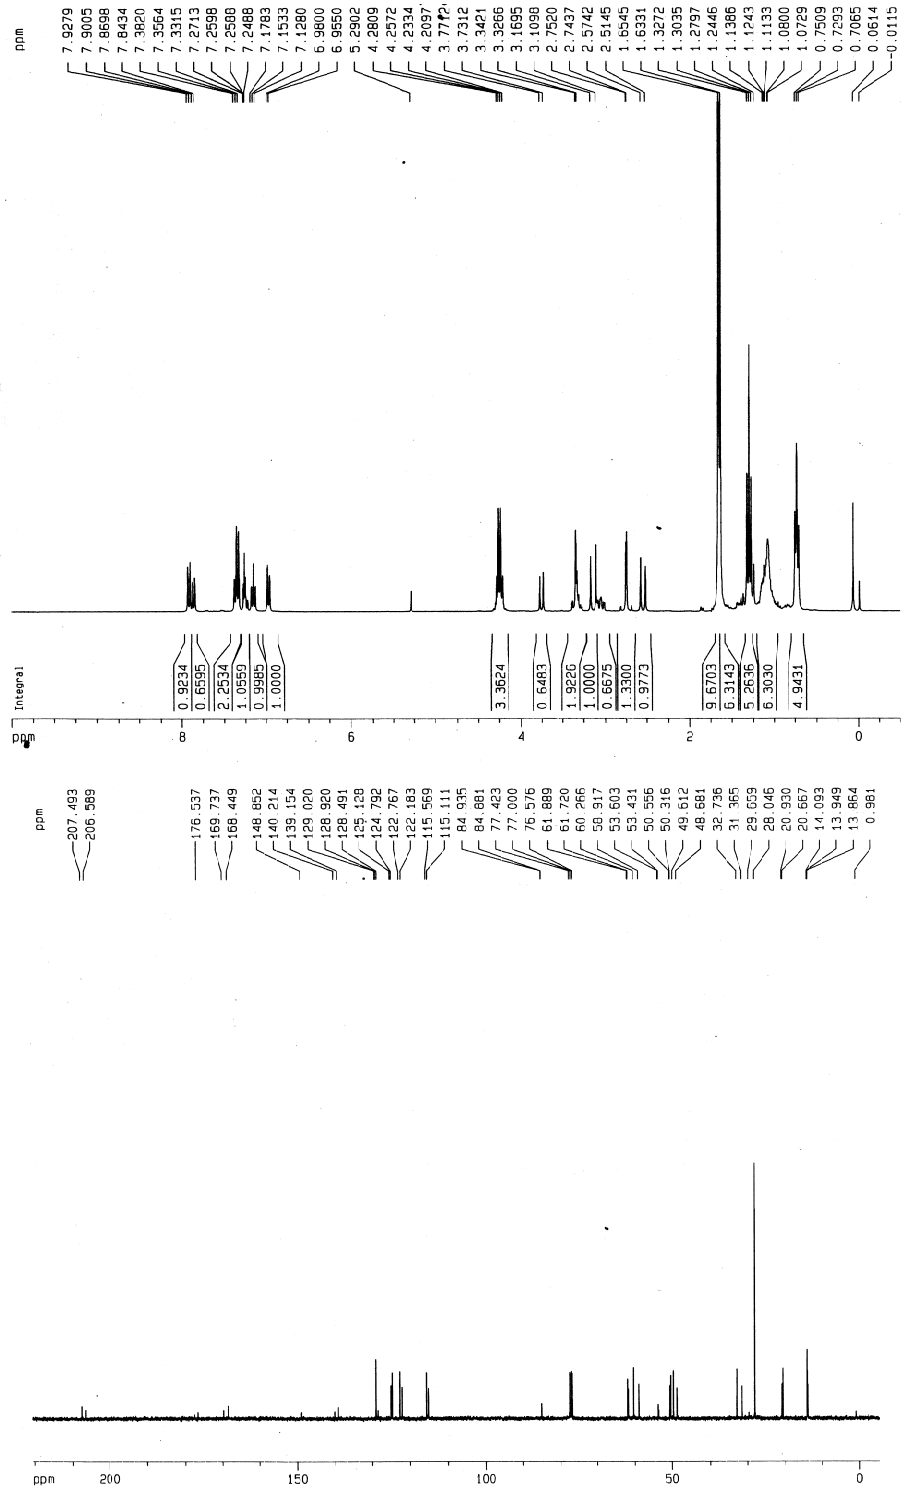

# <sup>1</sup>H and <sup>13</sup>C NMR of 5a

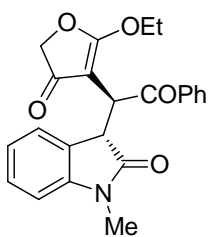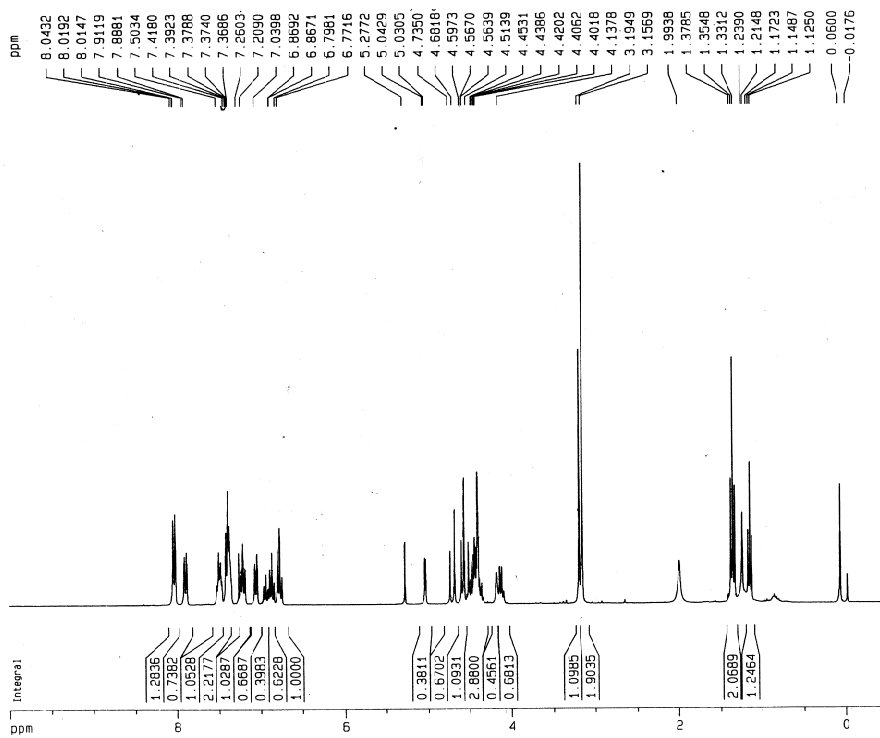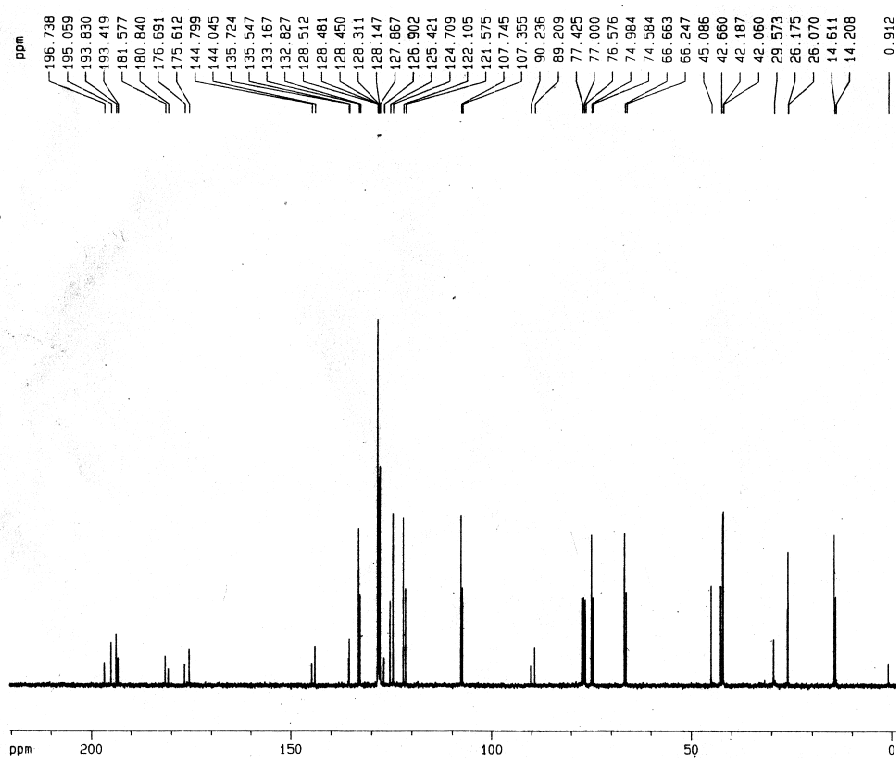

# <sup>1</sup>H and <sup>13</sup>C NMR of 5b

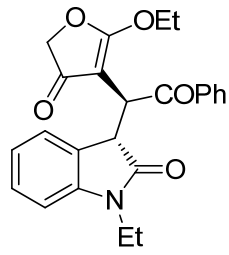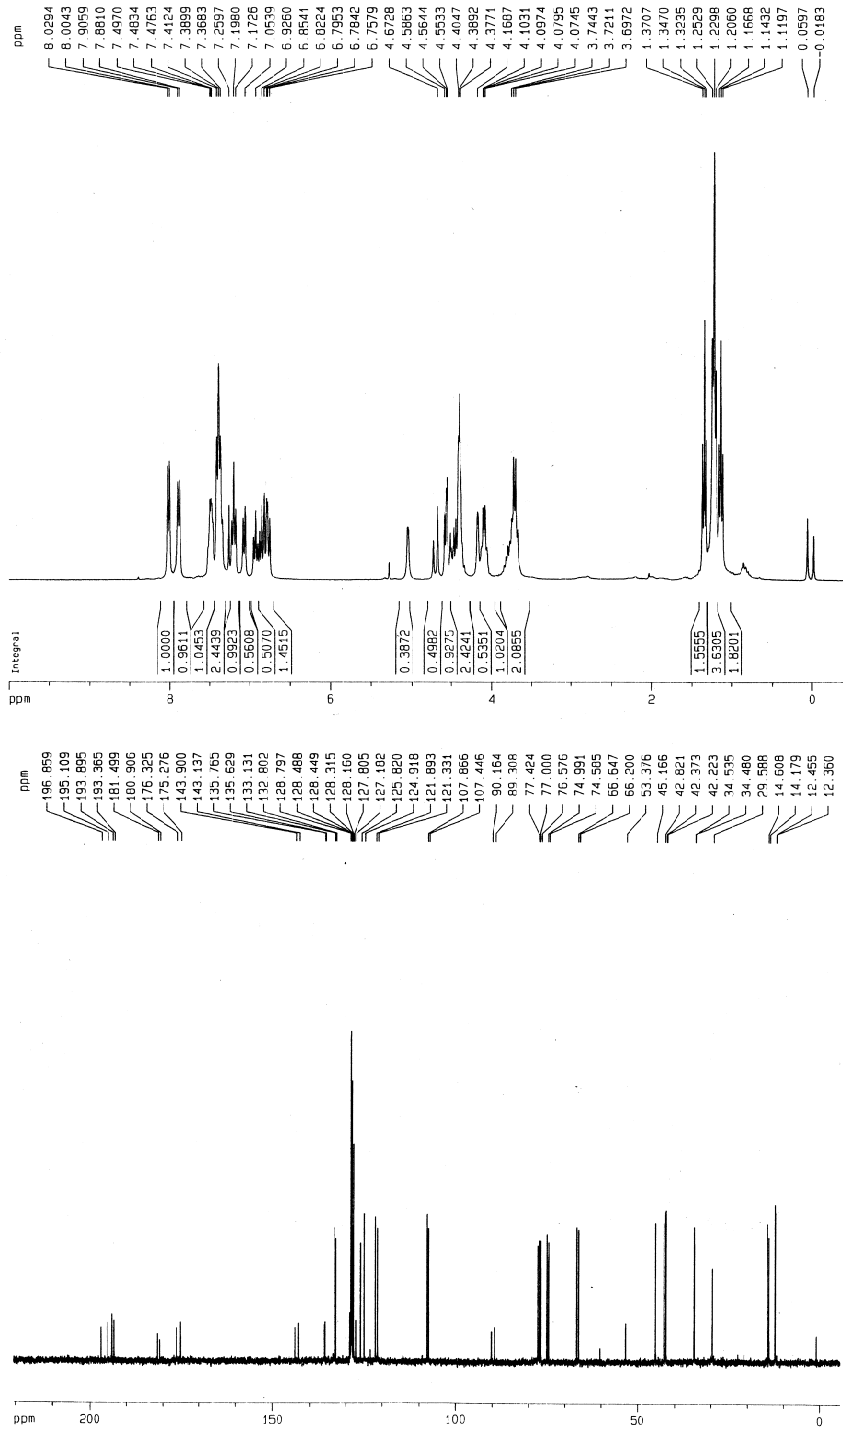

# <sup>1</sup>H and <sup>13</sup>C NMR of 5c

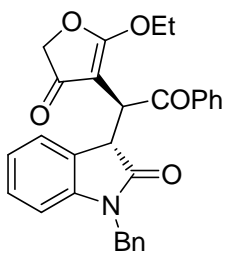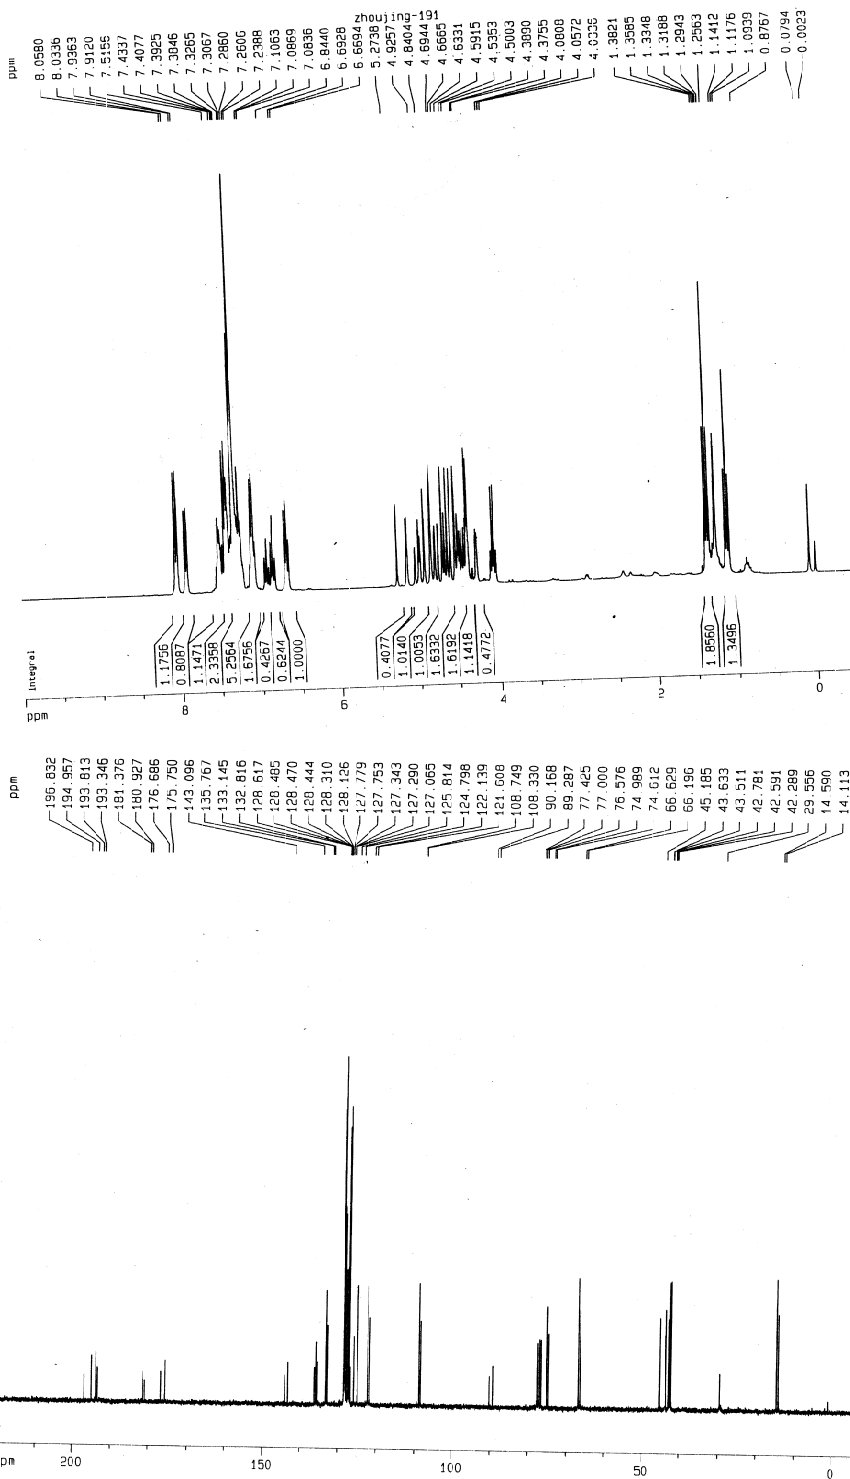



**<sup>1</sup>H and <sup>13</sup>C NMR of 5d**

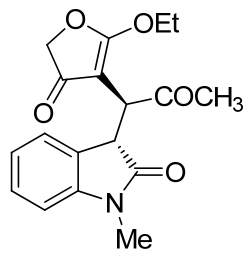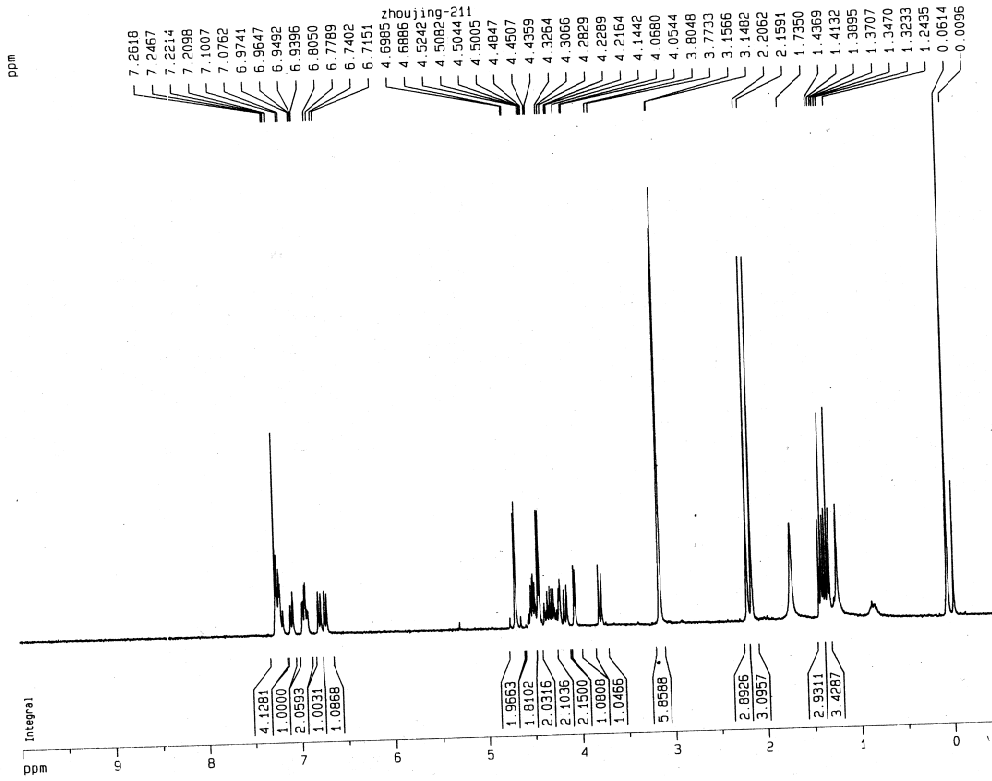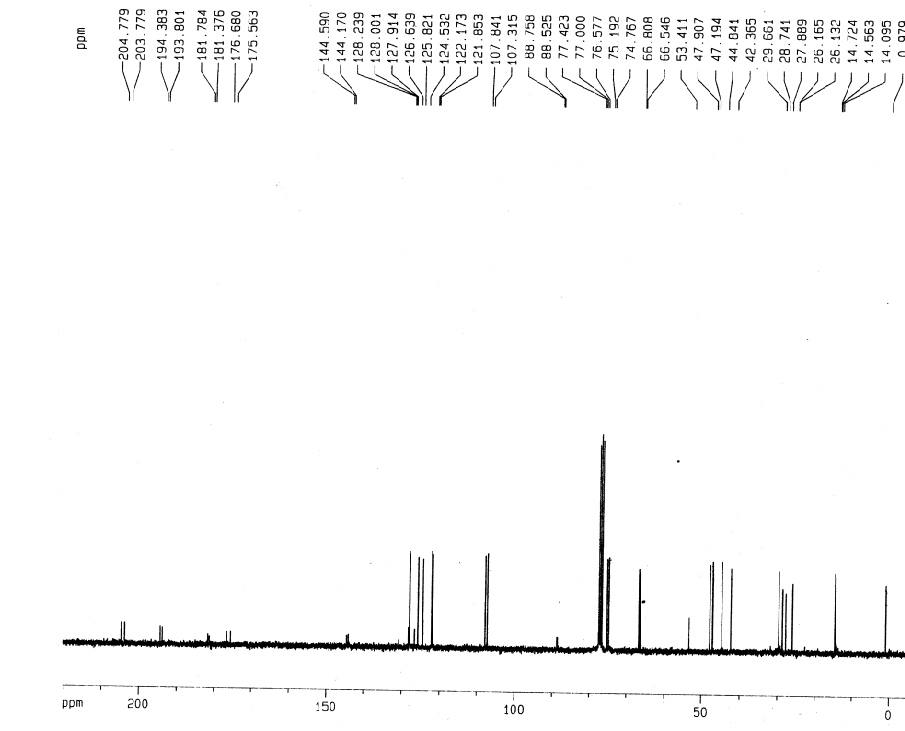

# <sup>1</sup>H and <sup>13</sup>C NMR of 5e

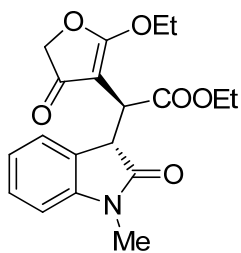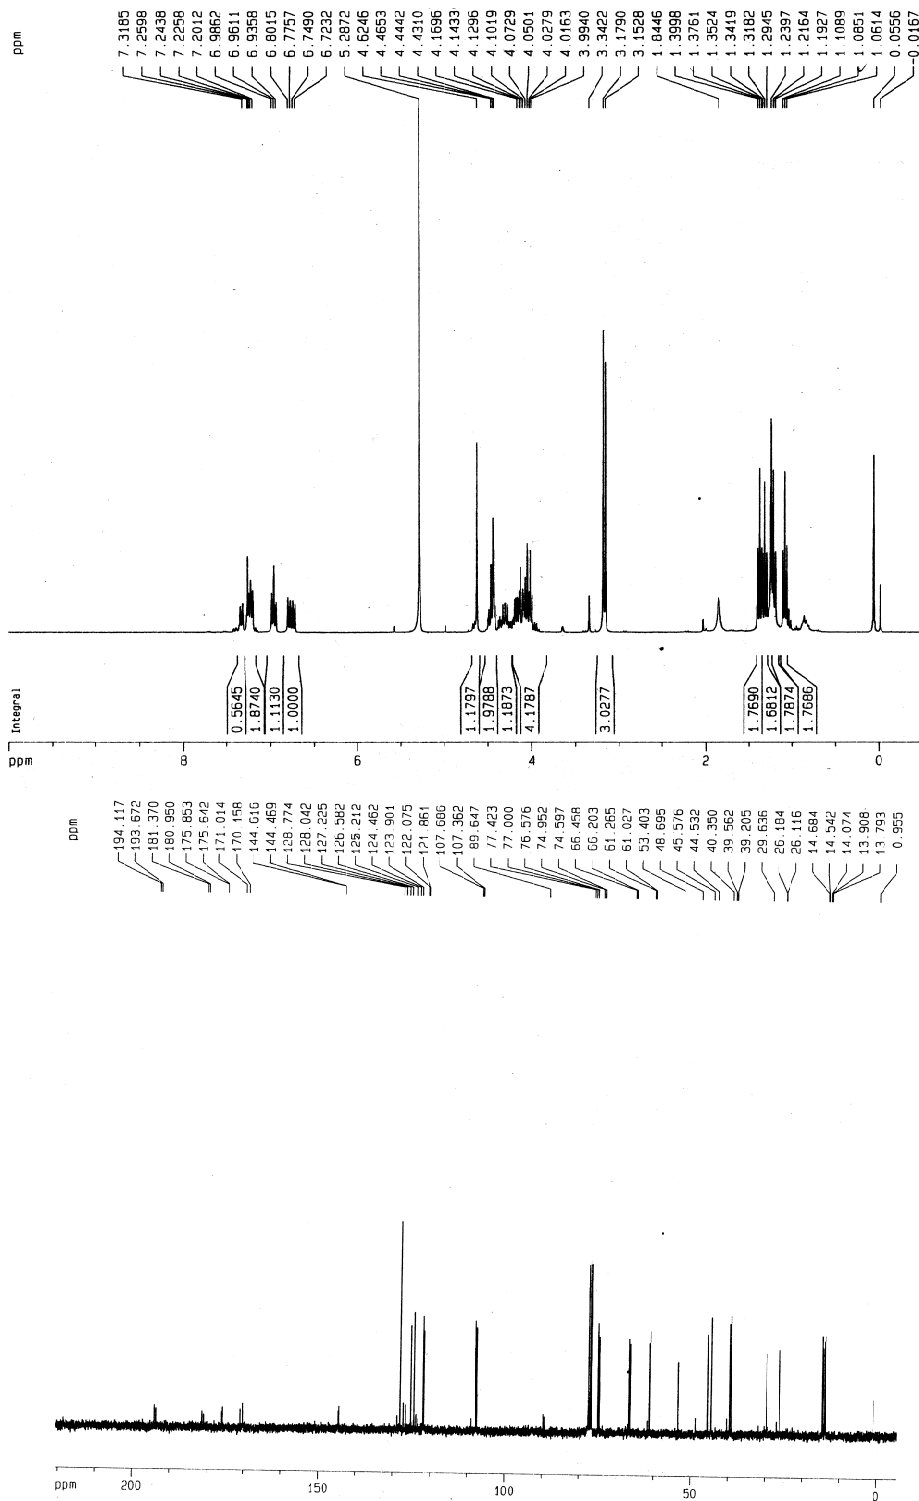

# <sup>1</sup>H and <sup>13</sup>C NMR of 5f

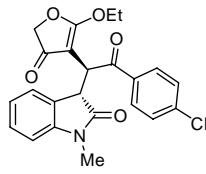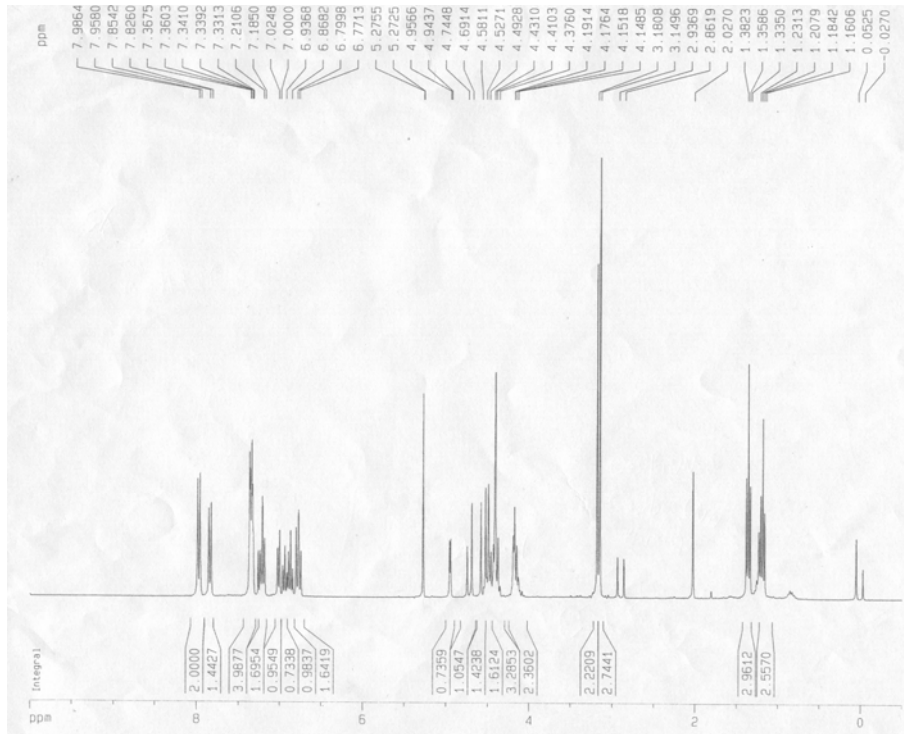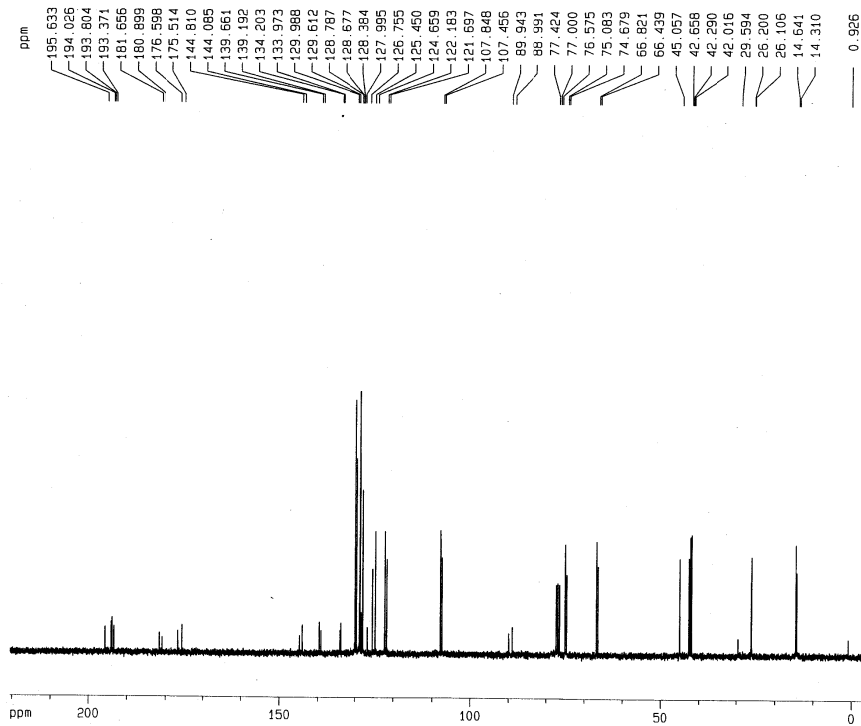

## 8. HPLC Spectra

### HPLC of 4a

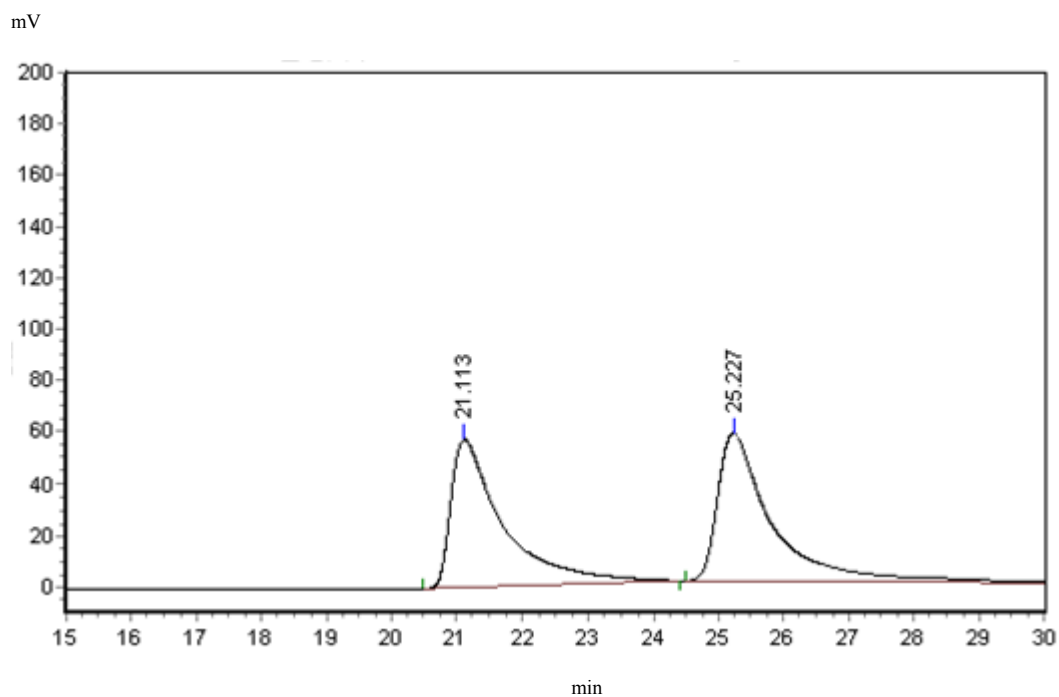

| Peak | RT (min) | Height (mV* sec) | Area (mV)   | Area (%) |
|------|----------|------------------|-------------|----------|
| 1    | 21.113   | 57034.938        | 3159161.500 | 48.4768  |
| 2    | 25.227   | 57097.367        | 3357692.500 | 51.5232  |

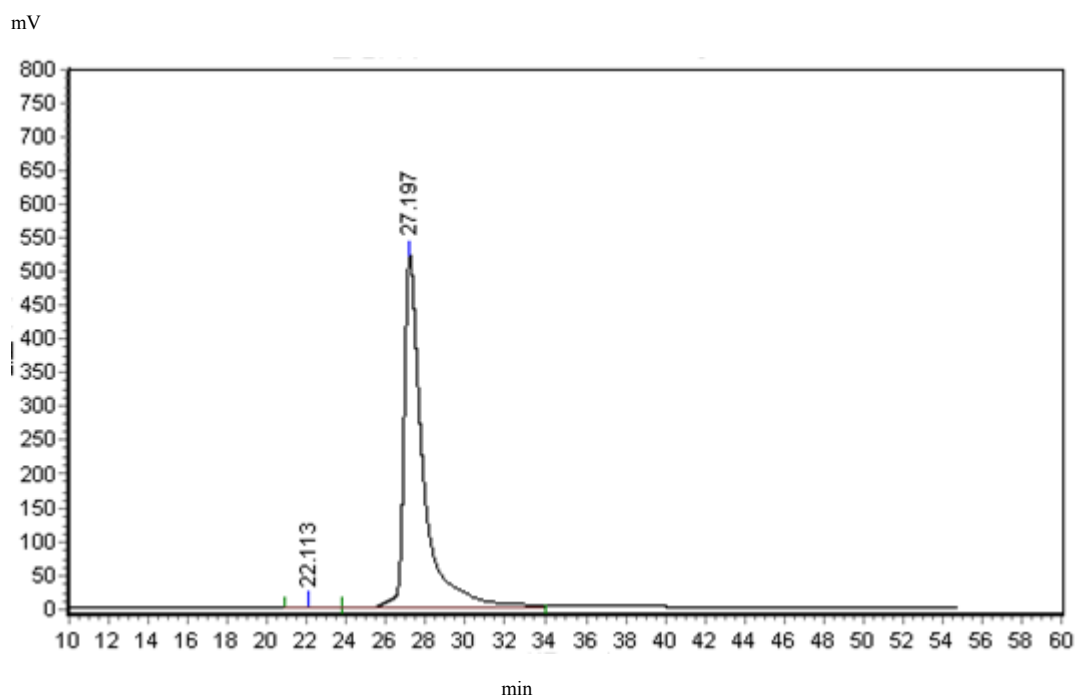

| Peak | RT (min) | Height (mV* sec) | Area (mV)    | Area (%) |
|------|----------|------------------|--------------|----------|
| 1    | 22.113   | 926.785          | 63574.160    | 0.1801   |
| 2    | 27.197   | 522731.063       | 35235796.000 | 99.8199  |

## HPLC of 4b

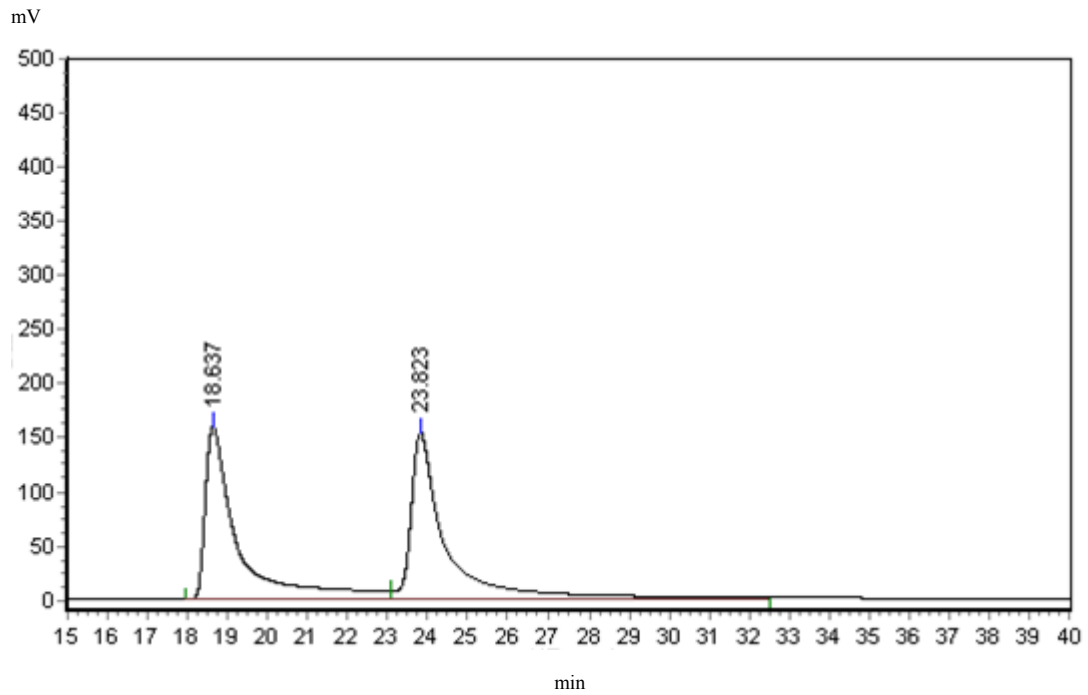

| Peak | RT (min) | Height (mV* sec) | Area (mV)   | Area (%) |
|------|----------|------------------|-------------|----------|
| 1    | 18.637   | 158864.156       | 9073485.000 | 48.5972  |
| 2    | 23.823   | 153290.094       | 9597323.000 | 51.4028  |

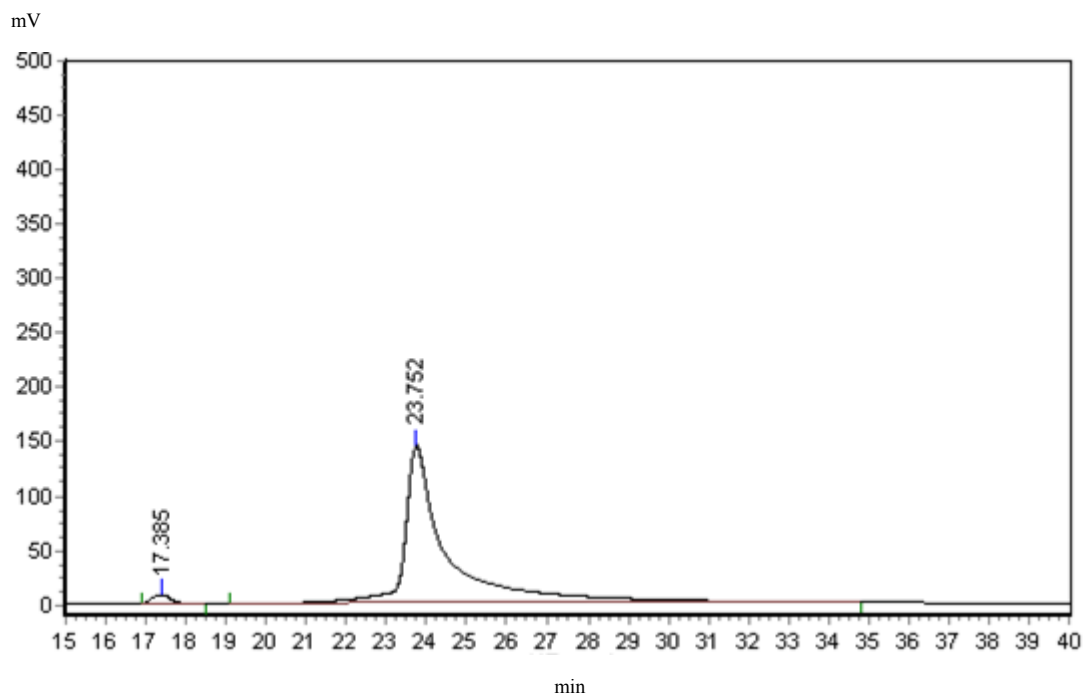

| Peak | RT (min) | Height (mV* sec) | Area (mV)    | Area (%) |
|------|----------|------------------|--------------|----------|
| 1    | 17.385   | 8135.778         | 261197.547   | 2.2699   |
| 2    | 23.752   | 144422.578       | 11246038.000 | 97.7301  |

## HPLC of 4c

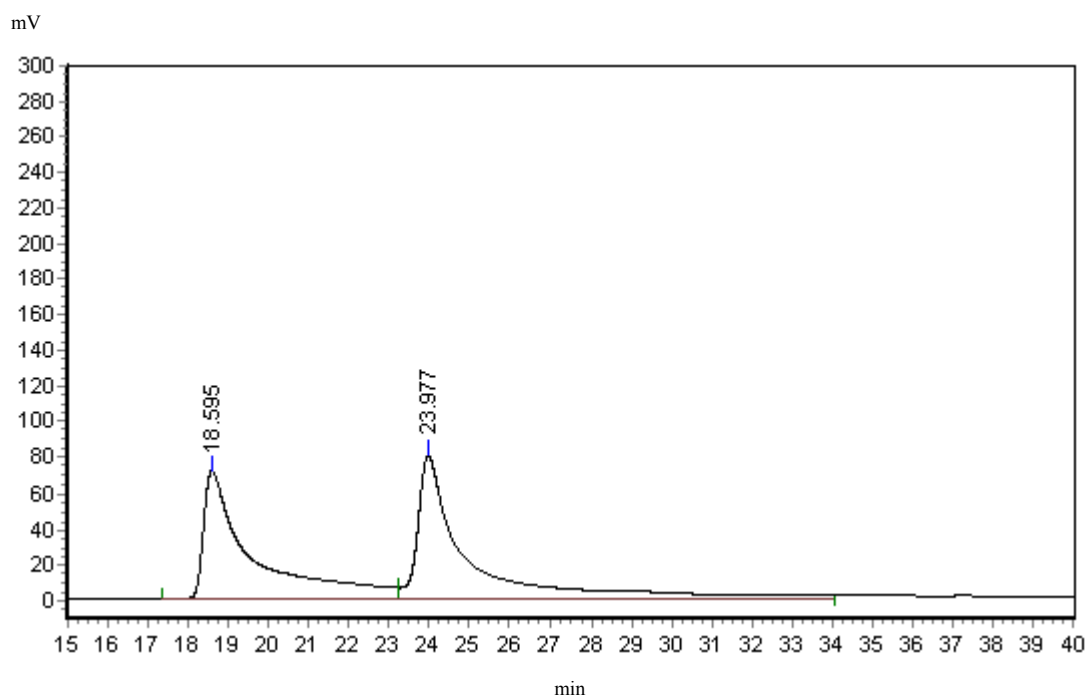

| Peak | RT (min) | Height (mV* sec) | Area (mV)   | Area (%) |
|------|----------|------------------|-------------|----------|
| 1    | 18.595   | 71069.992        | 6053160.500 | 47.9130  |
| 2    | 23.977   | 79654.258        | 6580487.000 | 52.0870  |

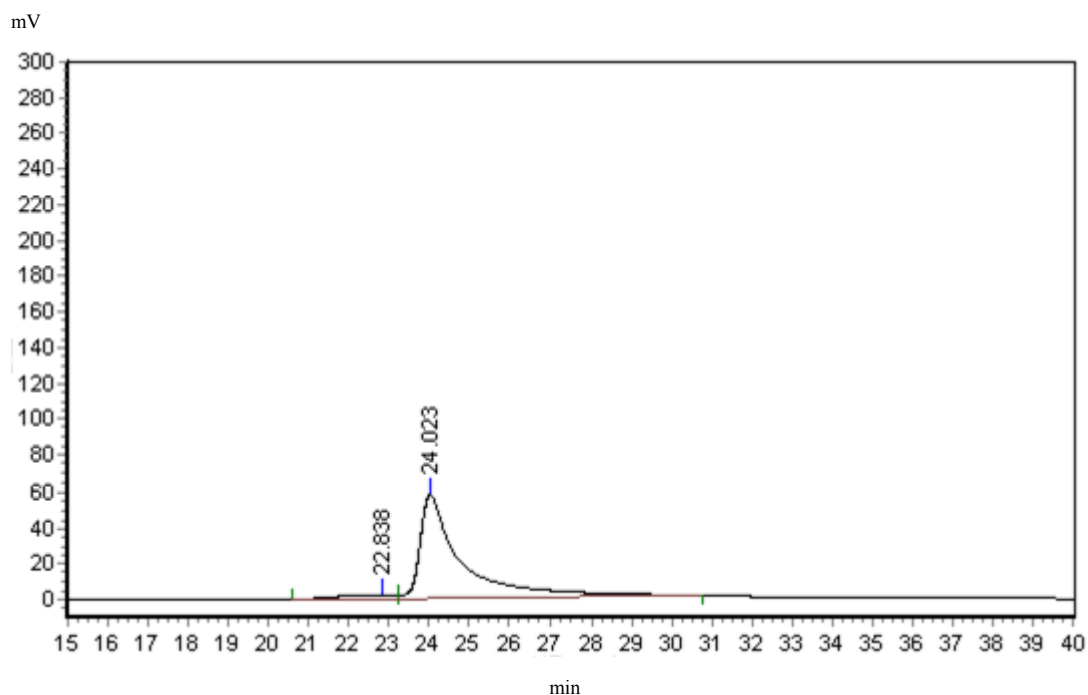

| Peak | RT (min) | Height (mV* sec) | Area (mV)   | Area (%) |
|------|----------|------------------|-------------|----------|
| 1    | 22.838   | 2009.948         | 213303.047  | 4.8532   |
| 2    | 24.023   | 57724.043        | 4181803.750 | 95.1468  |

# HPLC of 4d

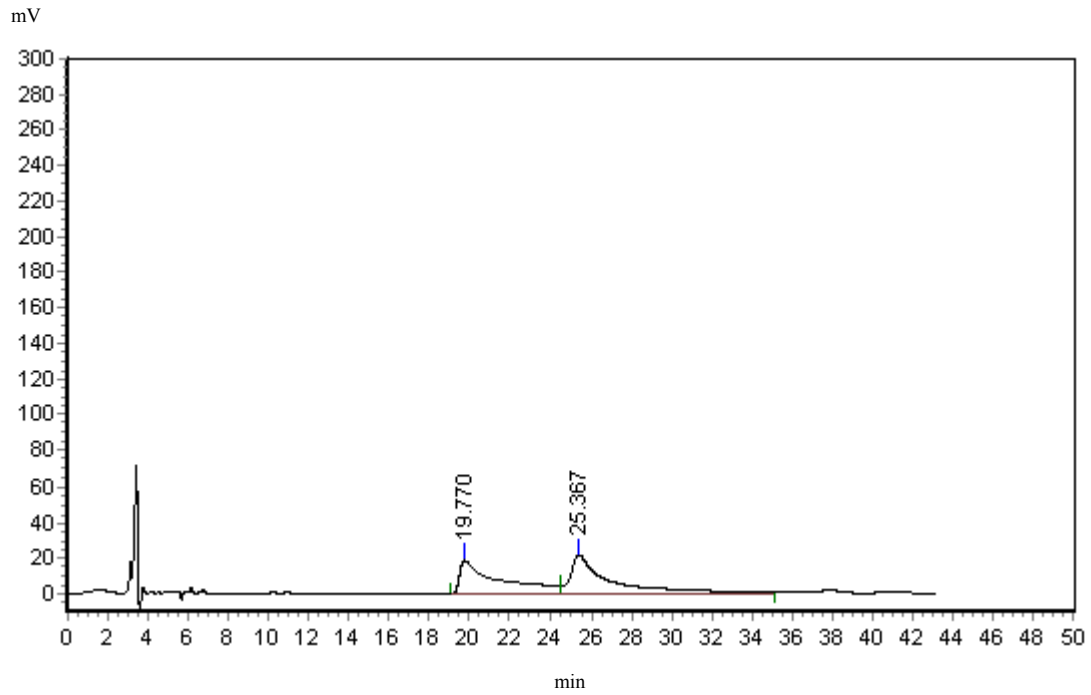

| Peak | RT (min) | Height (mV* sec) | Area (mV)   | Area (%) |
|------|----------|------------------|-------------|----------|
| 1    | 19.770   | 18489.016        | 2462103.500 | 45.5696  |
| 2    | 25.367   | 21754.004        | 2940848.750 | 54.4304  |

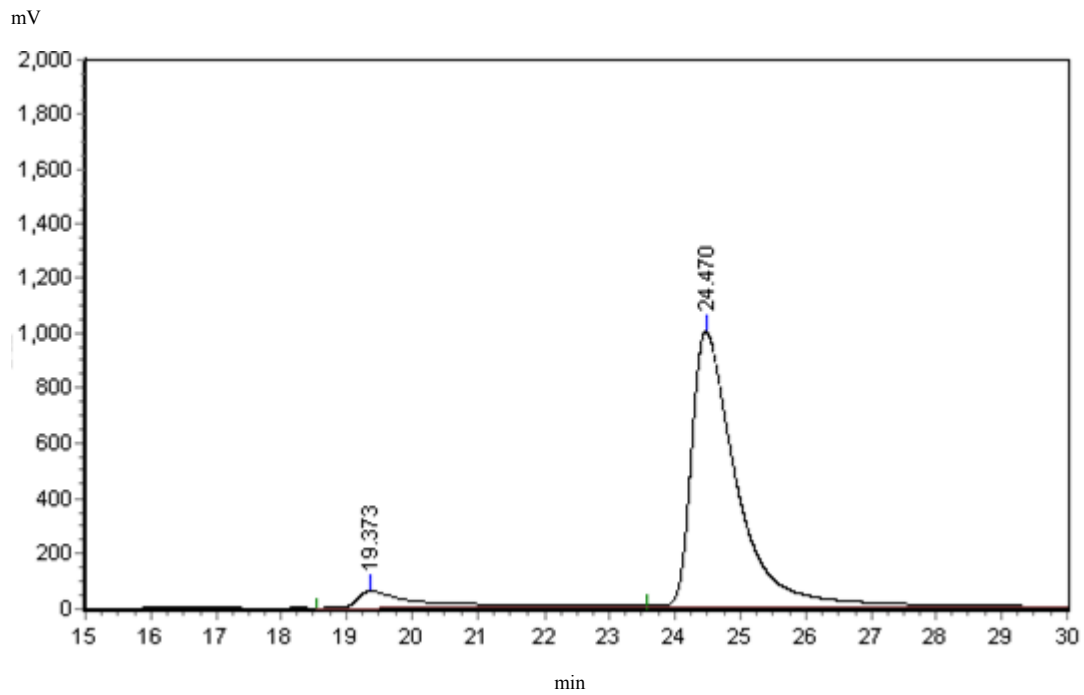

| Peak | RT (min) | Height (mV* sec) | Area (mV)    | Area (%) |
|------|----------|------------------|--------------|----------|
| 1    | 19.373   | 60494.559        | 5169482.000  | 9.2006   |
| 2    | 24.470   | 1005555.000      | 51017048.000 | 90.7994  |

## HPLC of 4e

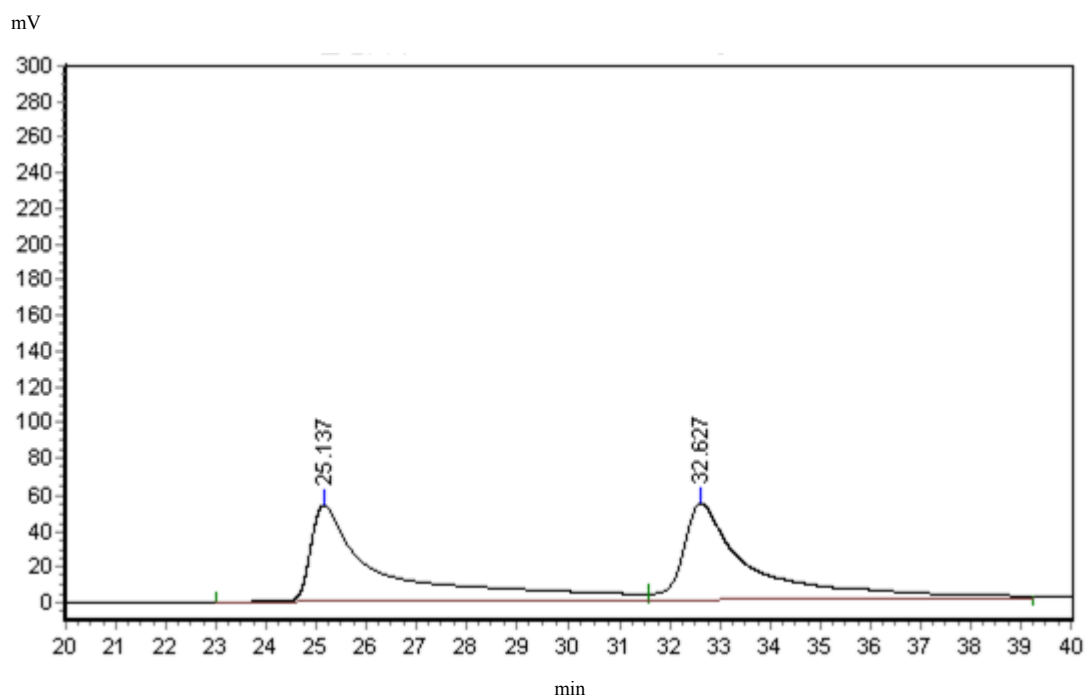

| Peak | RT (min) | Height (mV* sec) | Area (mV)   | Area (%) |
|------|----------|------------------|-------------|----------|
| 1    | 18.637   | 158864.156       | 9073485.000 | 48.5972  |
| 2    | 23.823   | 153290.094       | 9597323.000 | 51.4028  |

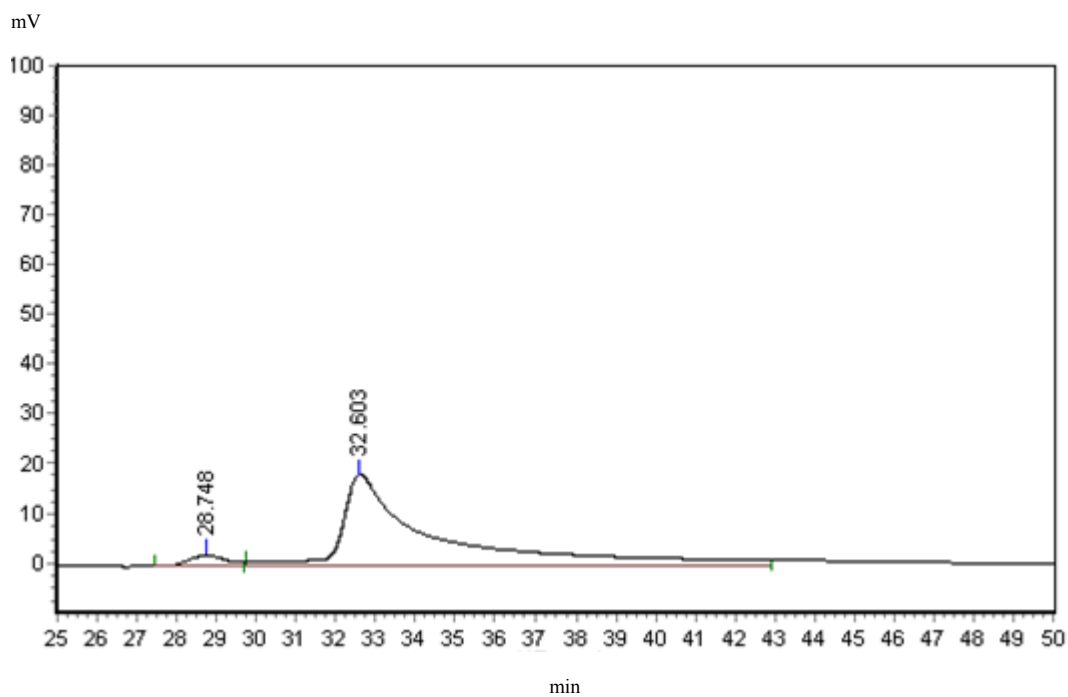

| Peak | RT (min) | Height (mV* sec) | Area (mV)   | Area (%) |
|------|----------|------------------|-------------|----------|
| 1    | 28.748   | 2173.176         | 143278.578  | 4.6452   |
| 2    | 32.603   | 18145.834        | 2941175.750 | 95.3548  |



## HPLC of 4f

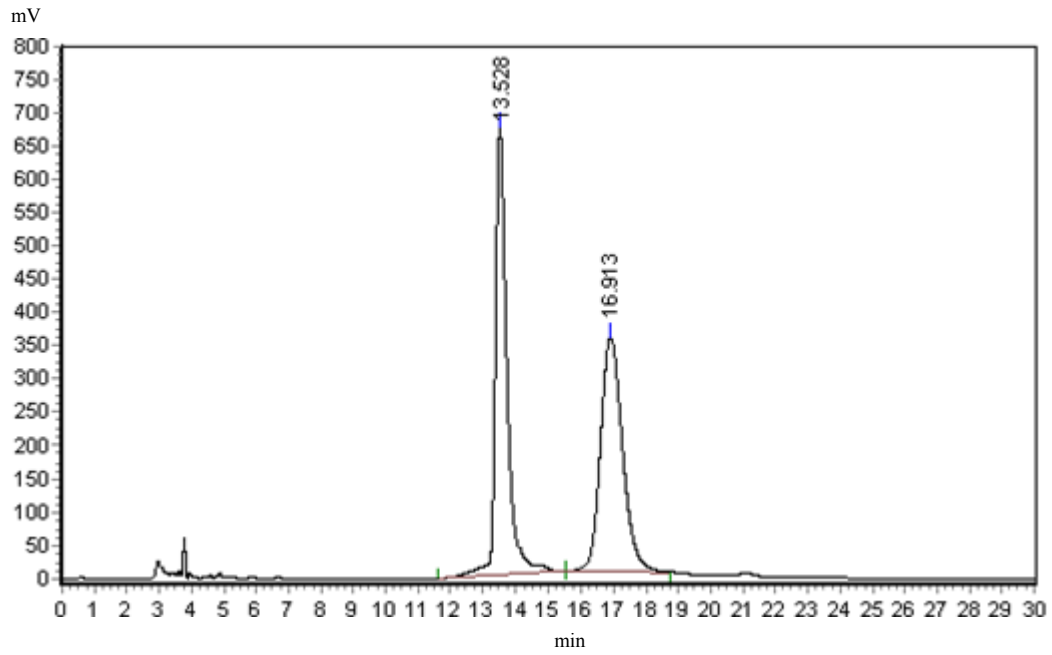

| Peak | RT (min) | Height (mV* sec) | Area (mV)    | Area (%) |
|------|----------|------------------|--------------|----------|
| 1    | 13.528   | 676555.375       | 15809841.000 | 48.6206  |
| 2    | 16.913   | 353296.406       | 16706911.000 | 51.3794  |

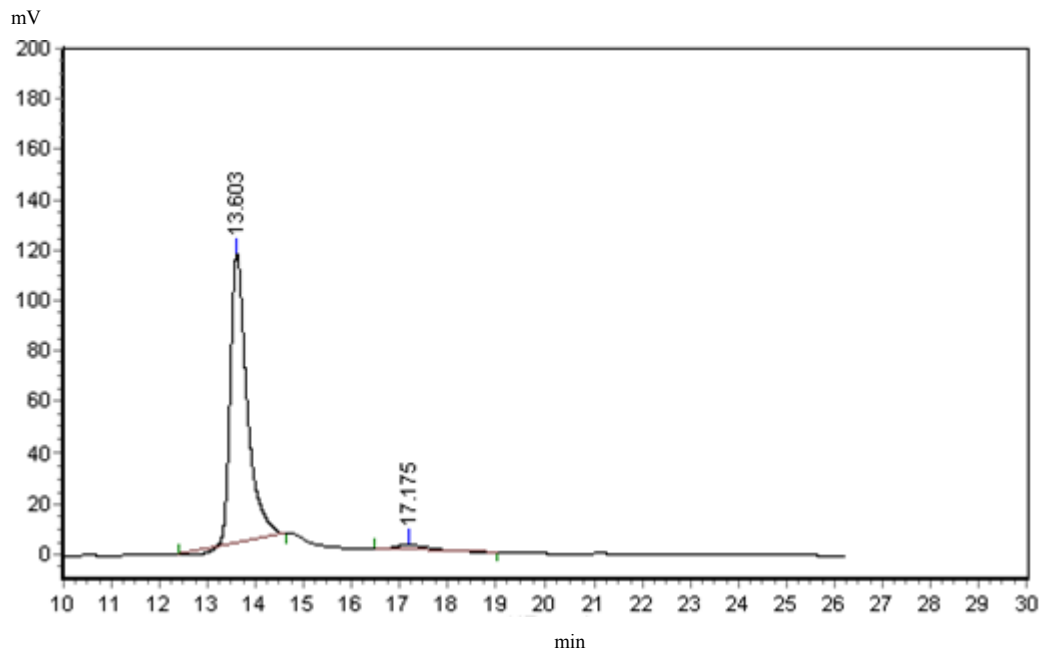

| Peak | RT (min) | Height (mV* sec) | Area (mV)   | Area (%) |
|------|----------|------------------|-------------|----------|
| 1    | 13.603   | 114582.305       | 2793556.250 | 96.1340  |
| 2    | 17.175   | 2092.568         | 112342.469  | 3.8660   |

### HPLC of 4g

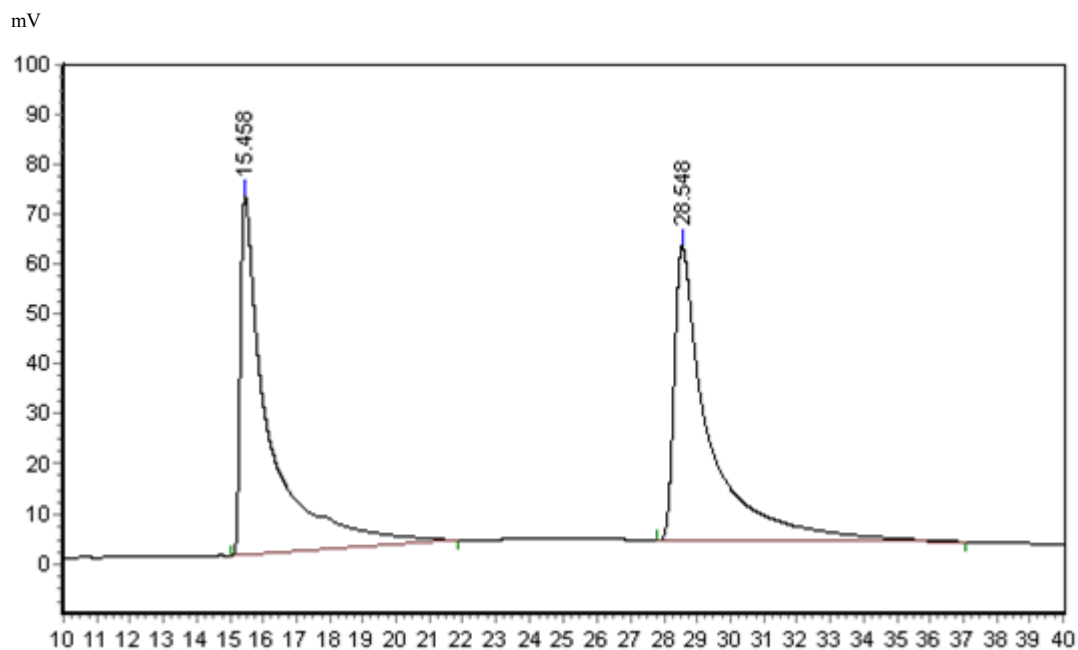

| Peak | RT (min) | Height (mV* sec) | Area (mV)   | Area (%) |
|------|----------|------------------|-------------|----------|
| 1    | 15.458   | 71622.102        | 4247303.500 | 49.3414  |
| 2    | 28.548   | 58938.176        | 4360694.500 | 50.6586  |

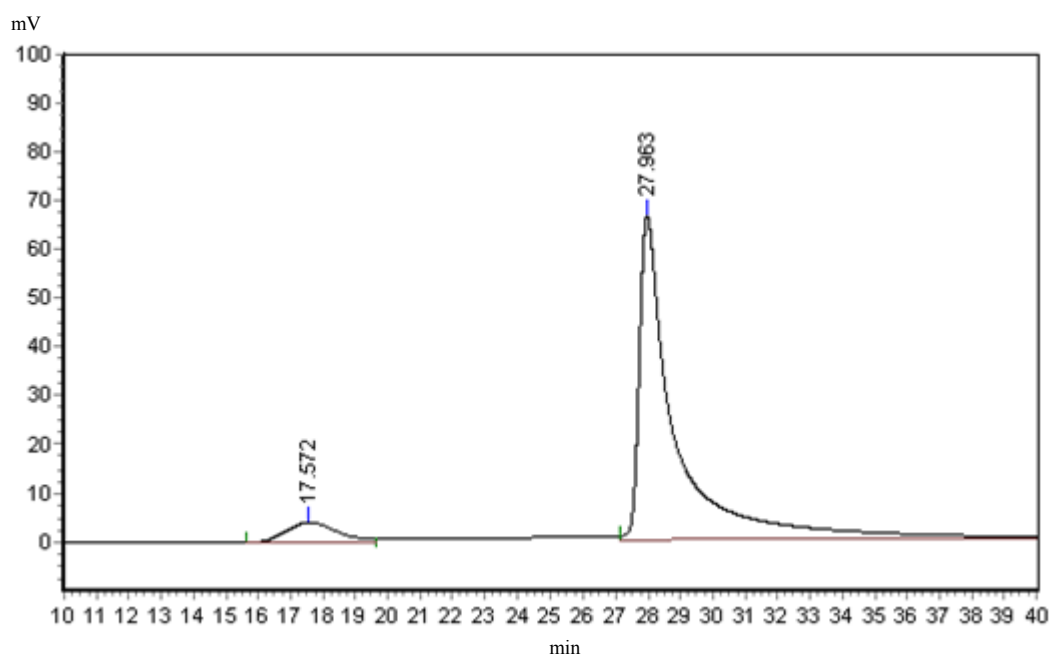

| Peak | RT (min) | Height (mV* sec) | Area (mV)   | Area (%) |
|------|----------|------------------|-------------|----------|
| 1    | 17.572   | 4054.498         | 450936.500  | 7.8607   |
| 2    | 27.963   | 66477.234        | 5285693.000 | 92.1394  |

### HPLC of 4h

mV

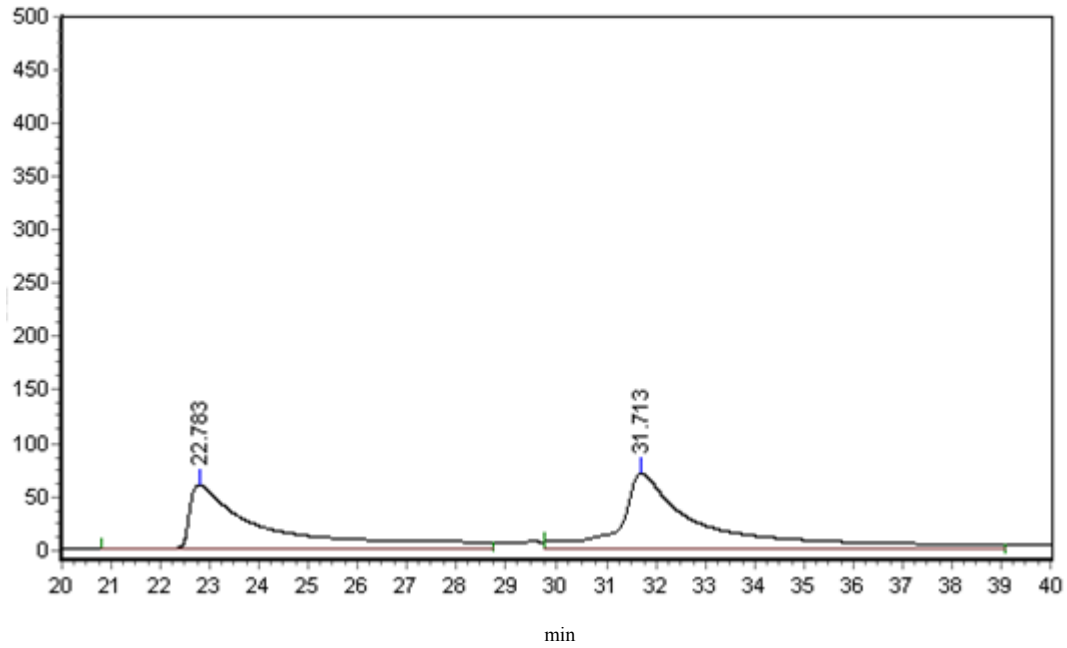

| Peak | RT (min) | Height (mV* sec) | Area (mV)   | Area (%) |
|------|----------|------------------|-------------|----------|
| 1    | 22.783   | 60930.469        | 6667377.000 | 43.5111  |
| 2    | 31.713   | 71760.727        | 8656026.000 | 56.4889  |

mV

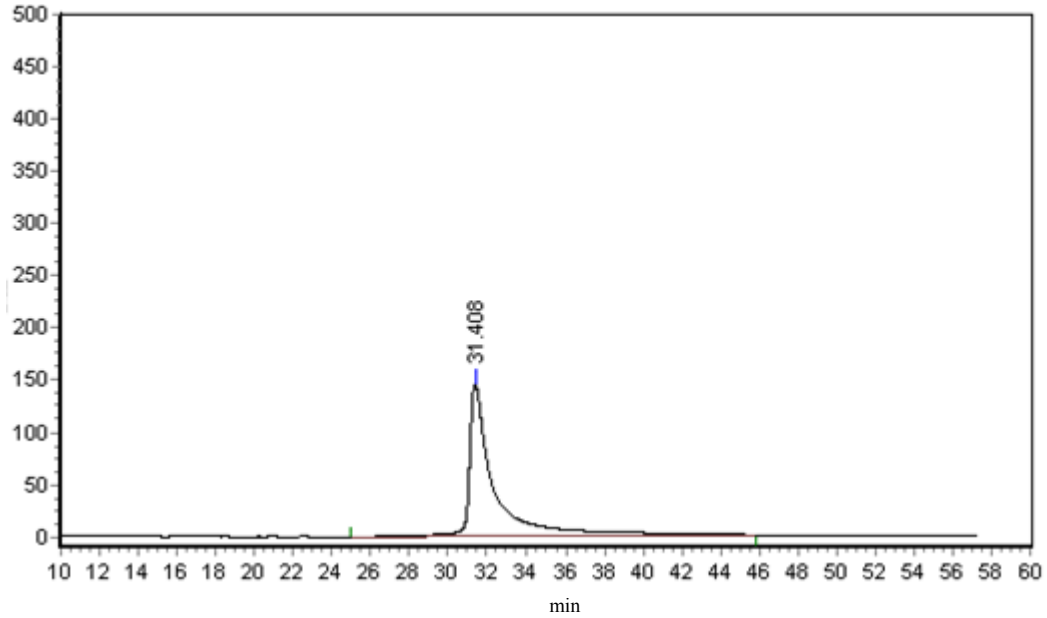

| Peak | RT (min) | Height (mV* sec) | Area (mV)    | Area (%) |
|------|----------|------------------|--------------|----------|
| 1    | 31.408   | 145808.547       | 13296896.000 | 100.0000 |

## HPLC of 4i

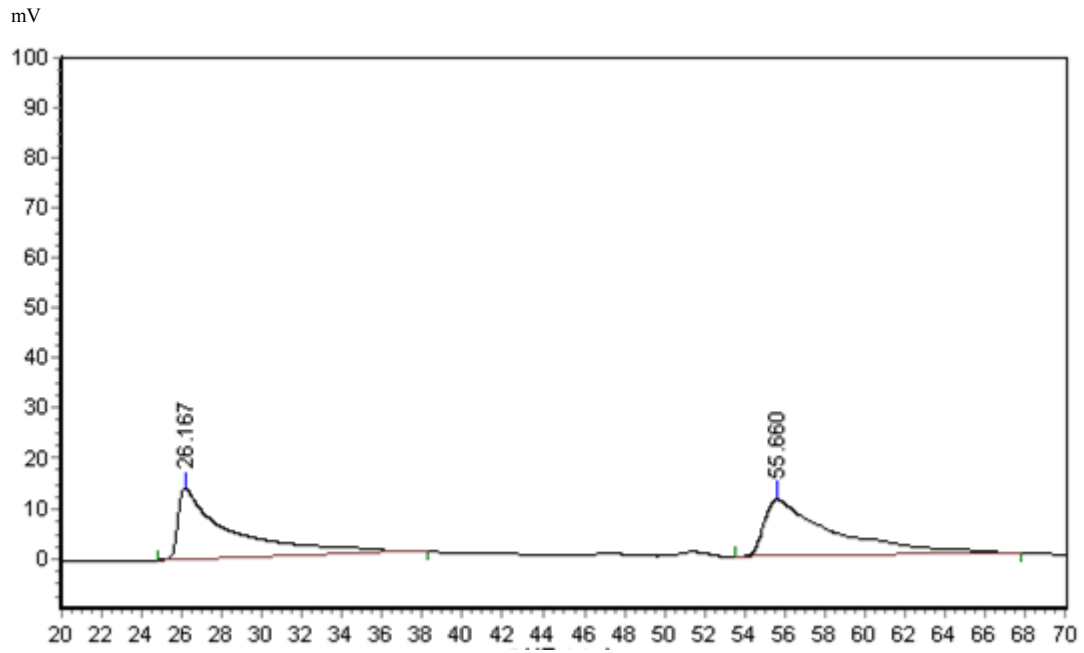

| Peak | RT (min) | Height (mV* sec) | Area (mV)   | Area (%) |
|------|----------|------------------|-------------|----------|
| 1    | 26.167   | 14086.023        | 2676671.250 | 49.2470  |
| 2    | 55.660   | 11337.842        | 2758529.250 | 50.7530  |

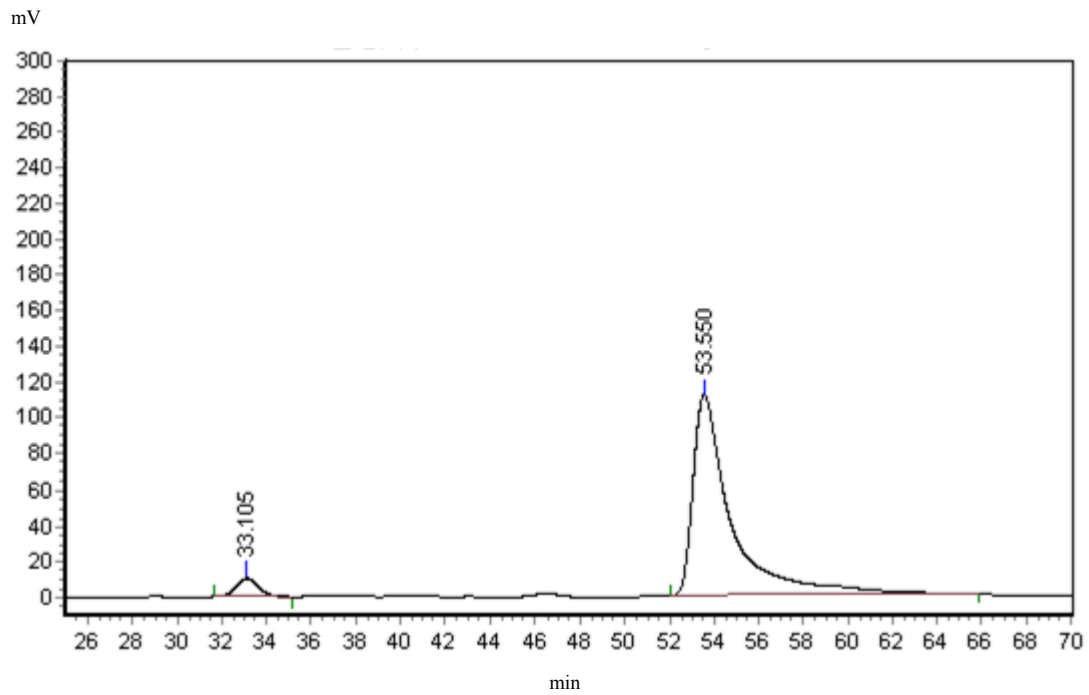

| Peak | RT (min) | Height (mV* sec) | Area (mV)    | Area (%) |
|------|----------|------------------|--------------|----------|
| 1    | 33.105   | 10210.298        | 699896.375   | 4.8426   |
| 2    | 53.550   | 112164.961       | 13752926.000 | 95.1574  |

## HPLC of 4j

mV

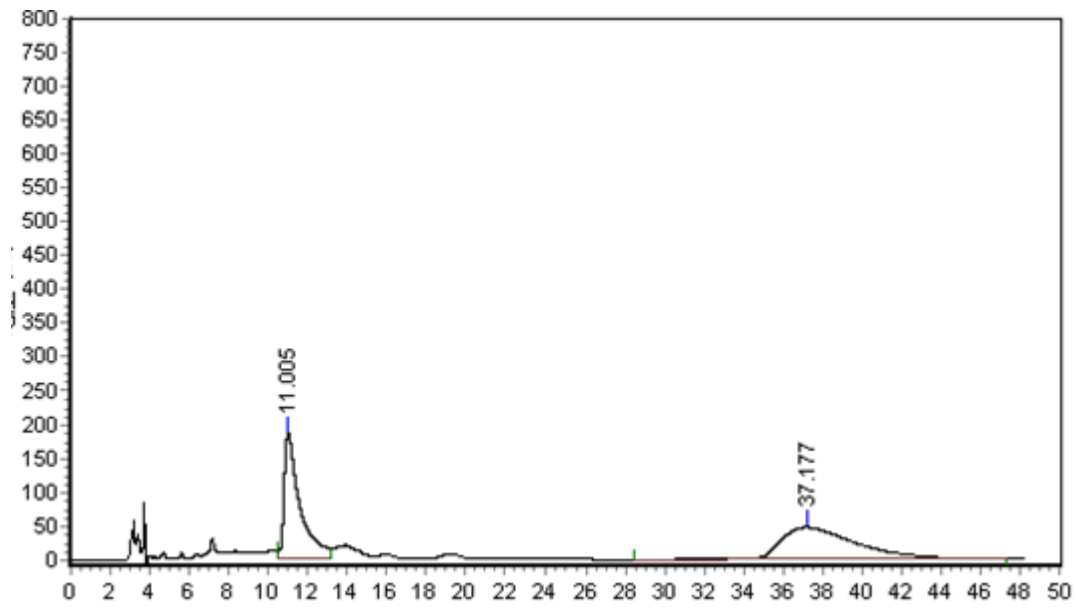

| Peak | RT (min) | Height (mV* sec) | Area (mV)    | Area (%) |
|------|----------|------------------|--------------|----------|
| 1    | 11.005   | 185894.375       | 10298760.000 | 44.7711  |
| 2    | 37.177   | 47316.285        | 12704383.000 | 55.2289  |

mV

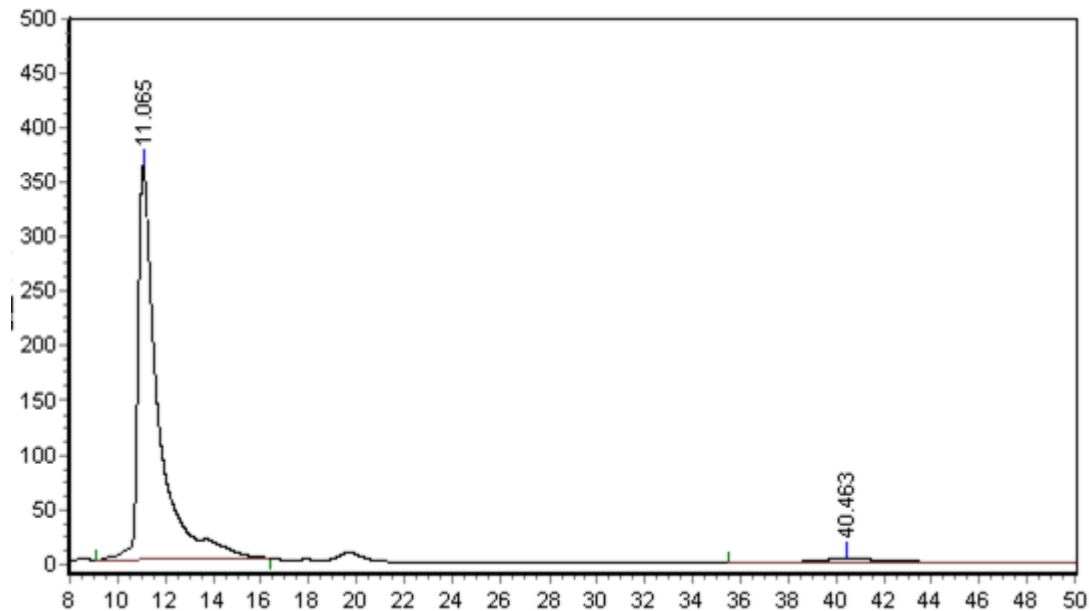

| Peak | RT (min) | Height (mV* sec) | Area (mV)    | Area (%) |
|------|----------|------------------|--------------|----------|
| 1    | 11.065   | 360846.094       | 21111378.000 | 94.5442  |
| 2    | 40.463   | 4082.953         | 1218253.875  | 5.4558   |

# HPLC of 4k

mV

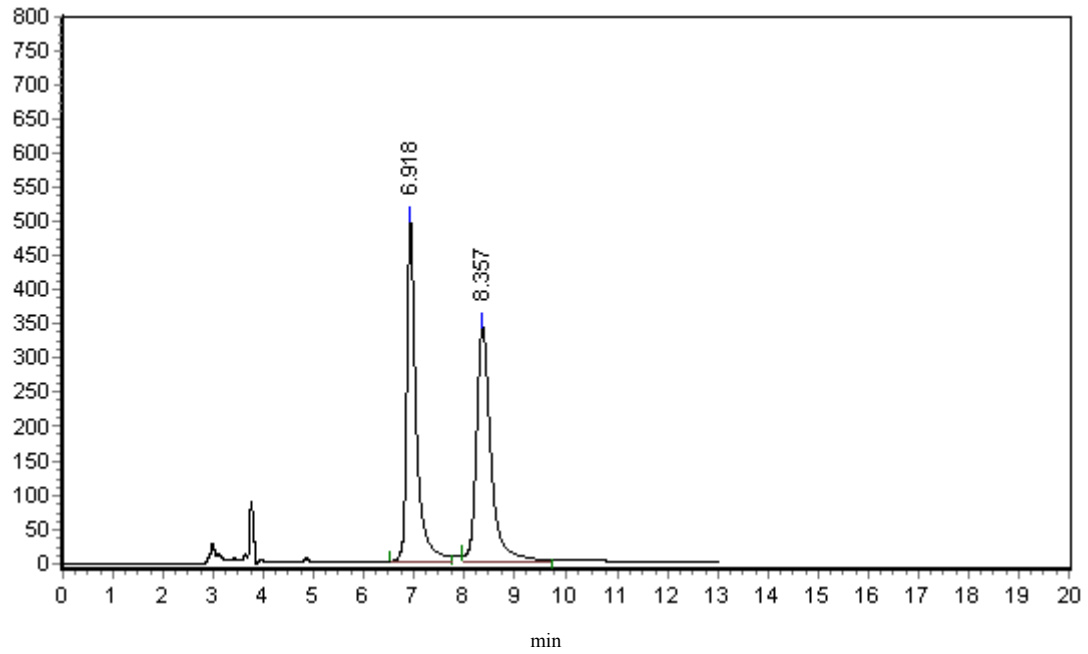

| Peak | RT (min) | Height (mV* sec) | Area (mV)   | Area (%) |
|------|----------|------------------|-------------|----------|
| 1    | 6.918    | 496906.563       | 6561655.000 | 48.5883  |
| 2    | 8.357    | 343034.656       | 6942956.500 | 51.4117  |

mV

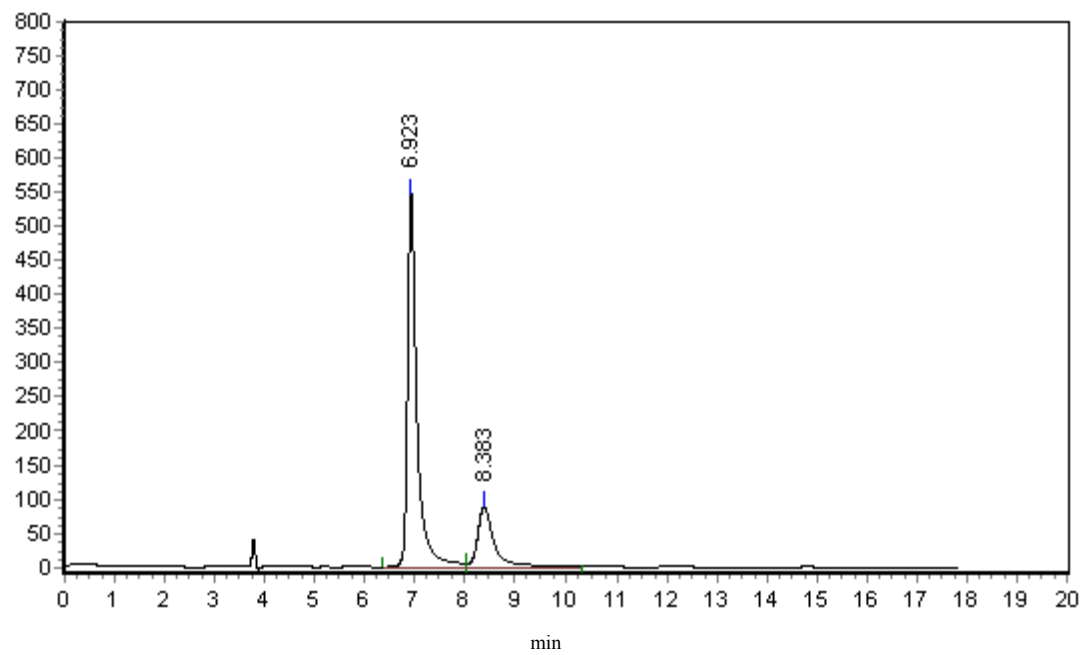

| Peak | RT (min) | Height (mV* sec) | Area (mV)   | Area (%) |
|------|----------|------------------|-------------|----------|
| 1    | 6.923    | 547429.875       | 7151476.500 | 77.5960  |
| 2    | 8.383    | 88634.570        | 2064822.375 | 22.4040  |

# HPLC of 4I

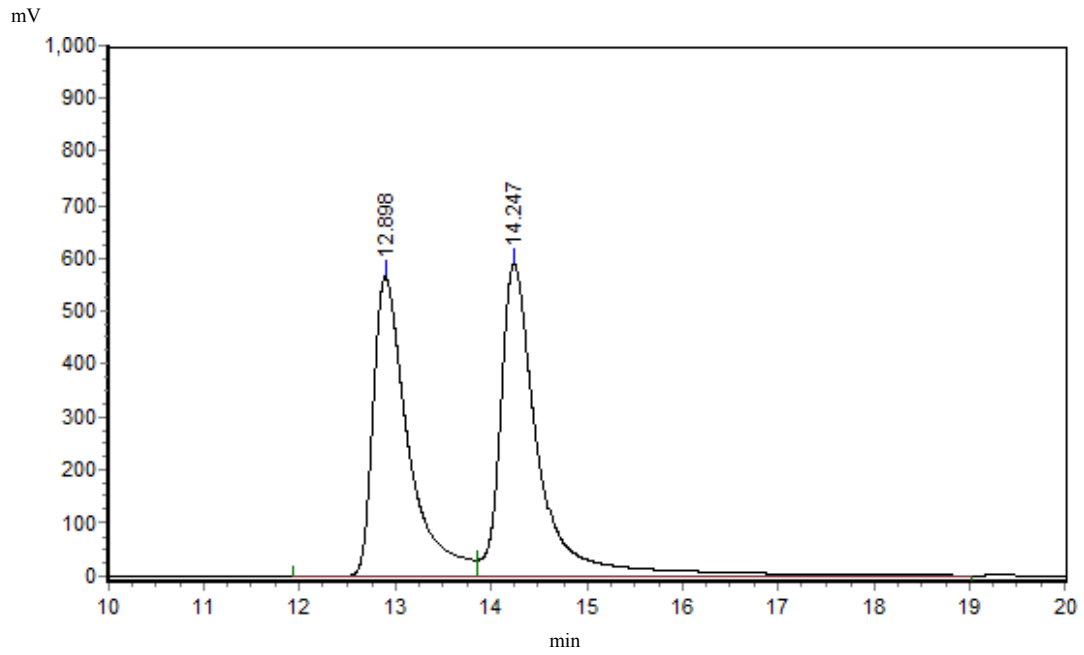

| Peak | RT (min) | Height (mV* sec) | Area (mV)    | Area (%) |
|------|----------|------------------|--------------|----------|
| 1    | 12.898   | 564359.813       | 14282760.000 | 46.6219  |
| 2    | 14.247   | 587730.000       | 16352512.000 | 53.3781  |

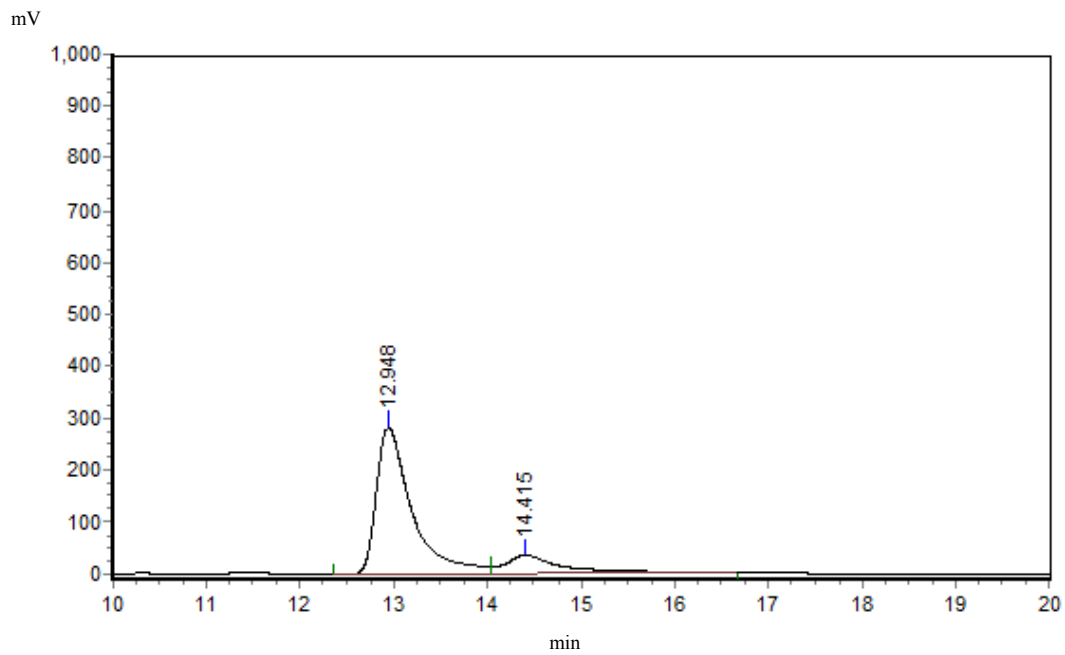

| Peak | RT (min) | Height (mV* sec) | Area (mV)   | Area (%) |
|------|----------|------------------|-------------|----------|
| 1    | 12.948   | 281216.250       | 7416119.500 | 82.7825  |
| 2    | 14.415   | 36398.543        | 1542440.625 | 17.2175  |

### HPLC of 4m

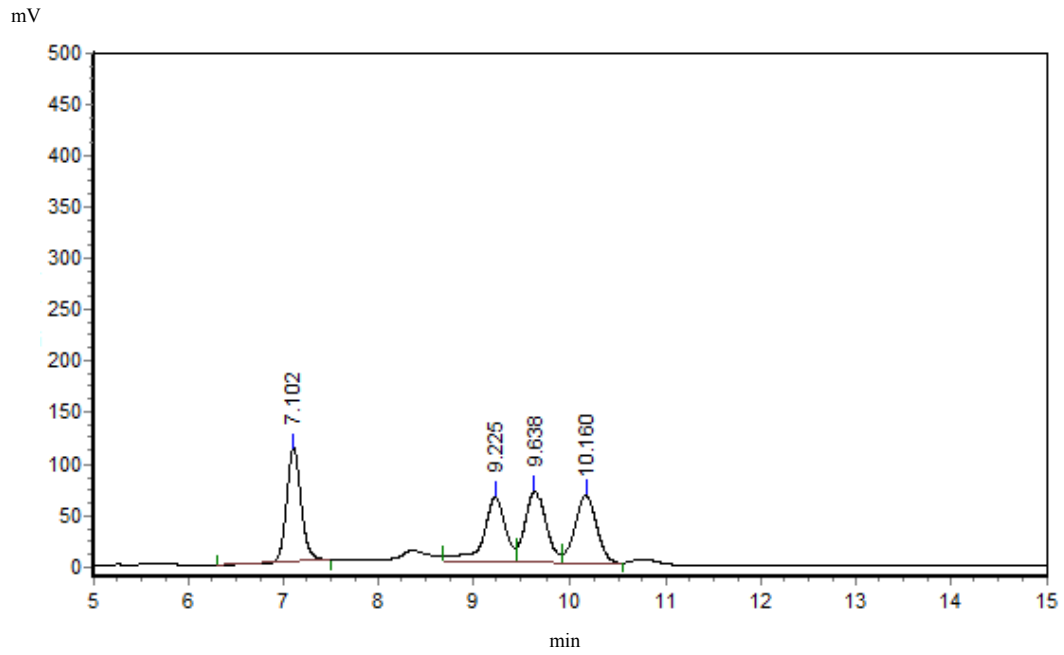

| Peak | RT (min) | Height (mV* sec) | Area (mV)   | Area (%) |
|------|----------|------------------|-------------|----------|
| 1    | 7.102    | 109165.617       | 1129207.875 | 26.8996  |
| 2    | 9.225    | 63122.781        | 1024552.750 | 24.4065  |
| 3    | 9.638    | 68817.586        | 996239.500  | 23.7321  |
| 4    | 10.160   | 66661.102        | 1047861.125 | 24.9618  |

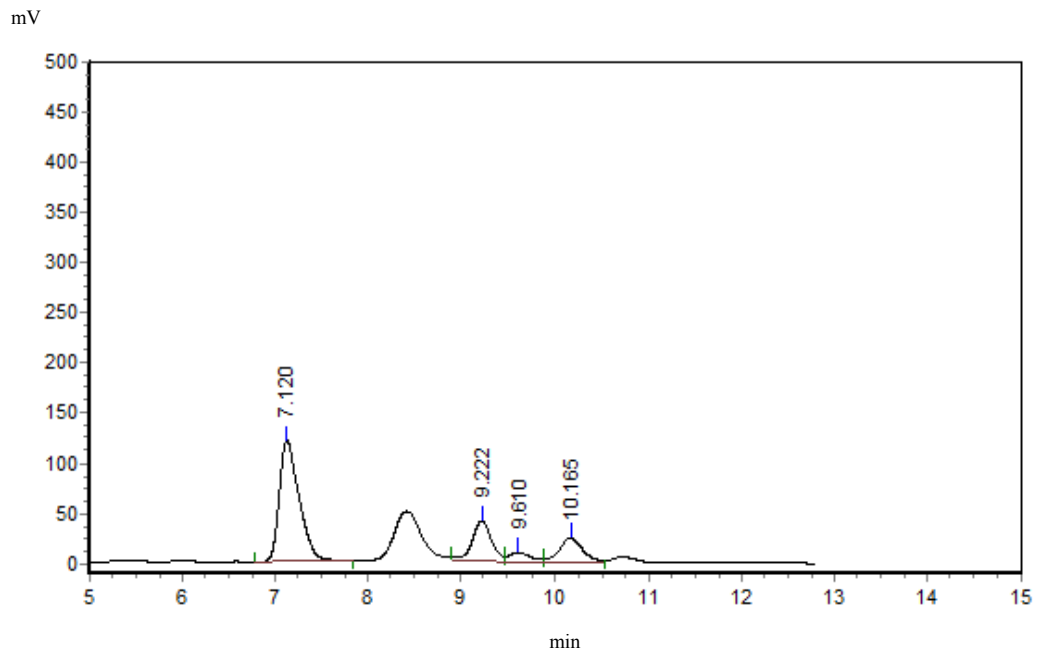

| Peak | RT (min) | Height (mV* sec) | Area (mV)   | Area (%) |
|------|----------|------------------|-------------|----------|
| 1    | 7.120    | 121000.328       | 1803288.500 | 61.4996  |
| 2    | 9.222    | 40532.441        | 584209.438  | 19.9239  |
| 3    | 9.610    | 8910.404         | 139049.641  | 4.7422   |
| 4    | 10.165   | 23656.100        | 405649.563  | 13.8343  |



# HPLC of 4n

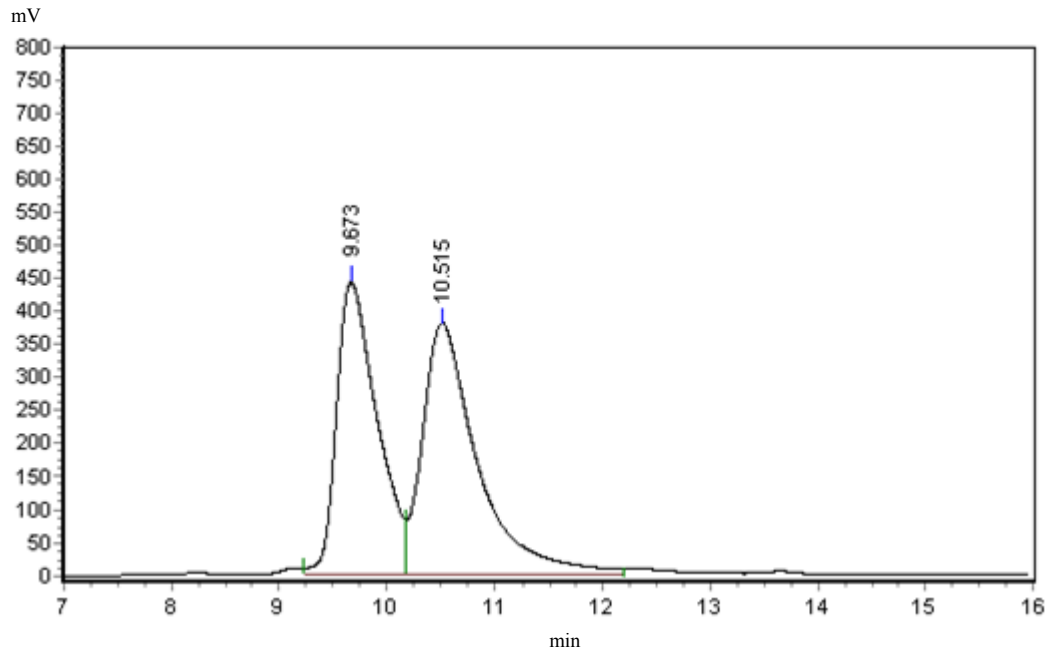

| Peak | RT (min) | Height (mV* sec) | Area (mV)    | Area (%) |
|------|----------|------------------|--------------|----------|
| 1    | 9.673    | 442705.375       | 11584841.000 | 46.0644  |
| 2    | 10.515   | 381609.469       | 13564391.000 | 53.9356  |

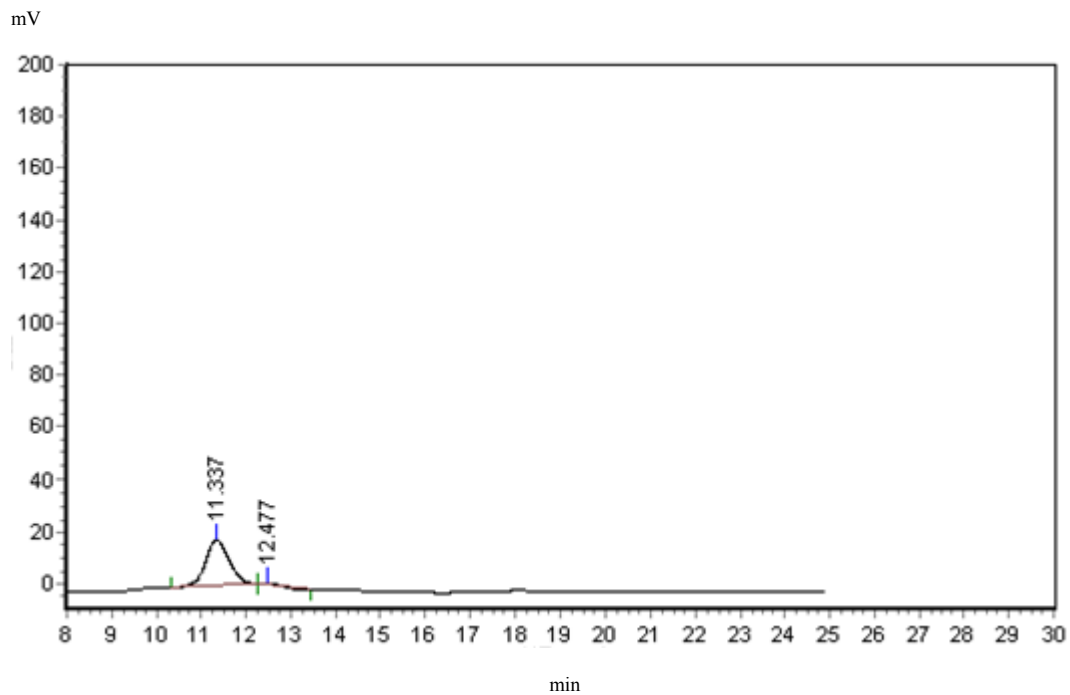

| Peak | RT (min) | Height (mV* sec) | Area (mV)  | Area (%) |
|------|----------|------------------|------------|----------|
| 1    | 11.337   | 17853.051        | 651255.688 | 98.1479  |
| 2    | 12.477   | 563.472          | 12289.600  | 1.8521   |

## HPLC of 4o

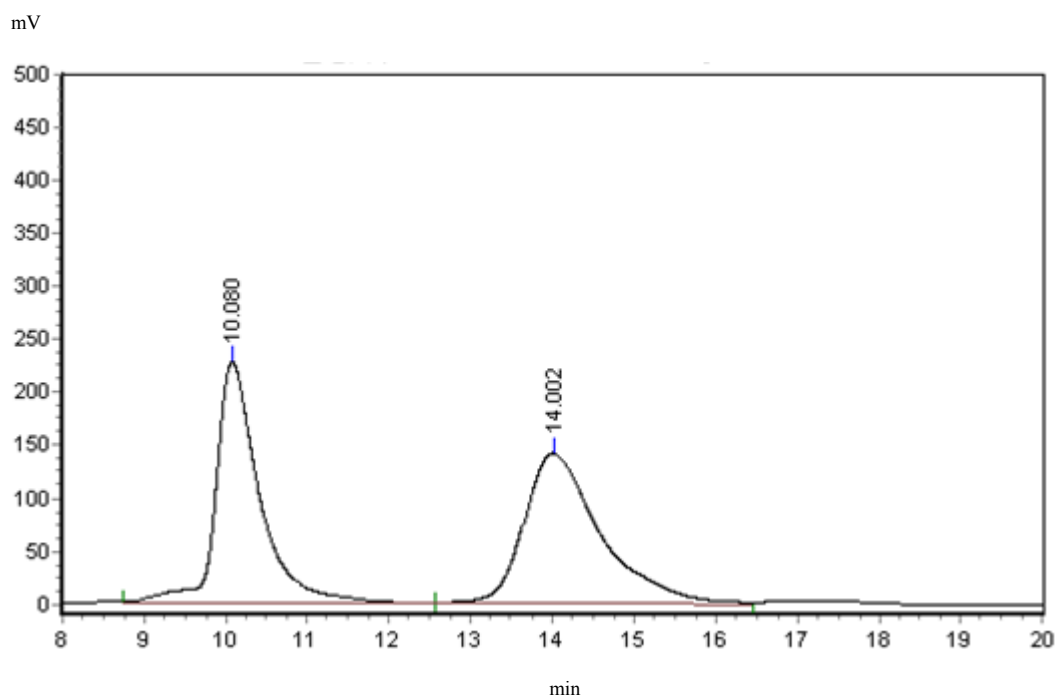

| Peak | RT (min) | Height (mV* sec) | Area (mV)   | Area (%) |
|------|----------|------------------|-------------|----------|
| 1    | 10.080   | 226868.469       | 8554892.000 | 48.0722  |
| 2    | 14.002   | 141295.547       | 9241038.000 | 51.9278  |

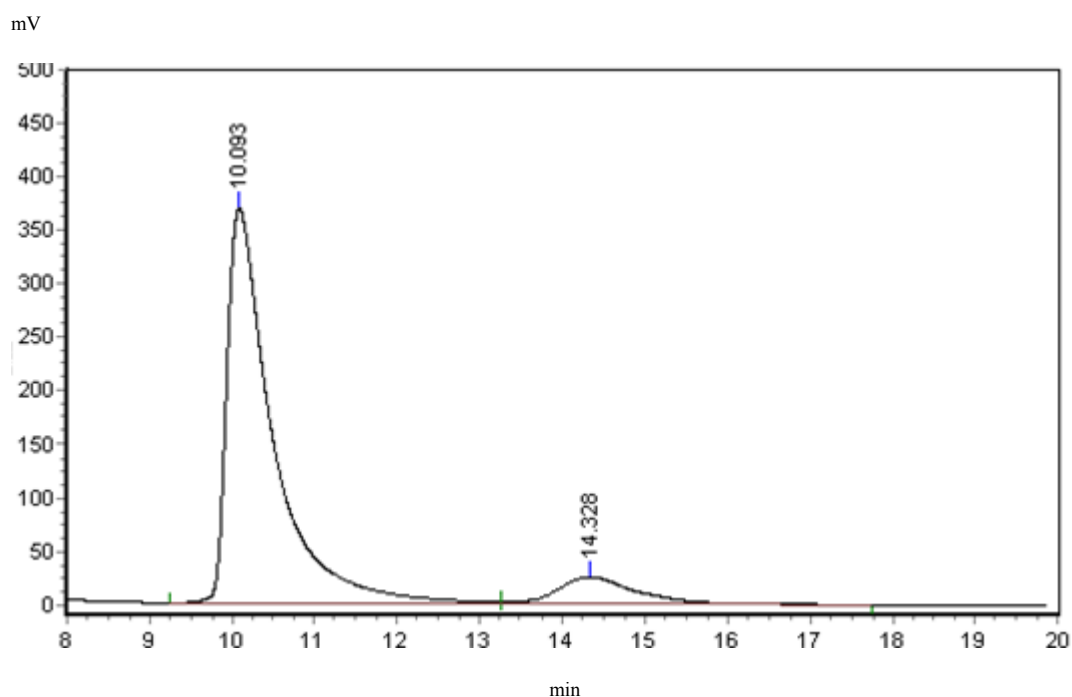

| Peak | RT (min) | Height (mV* sec) | Area (mV)    | Area (%) |
|------|----------|------------------|--------------|----------|
| 1    | 10.093   | 368045.313       | 14275149.000 | 89.2708  |
| 2    | 14.328   | 25302.035        | 1715685.750  | 10.7292  |

## HPLC of 4p

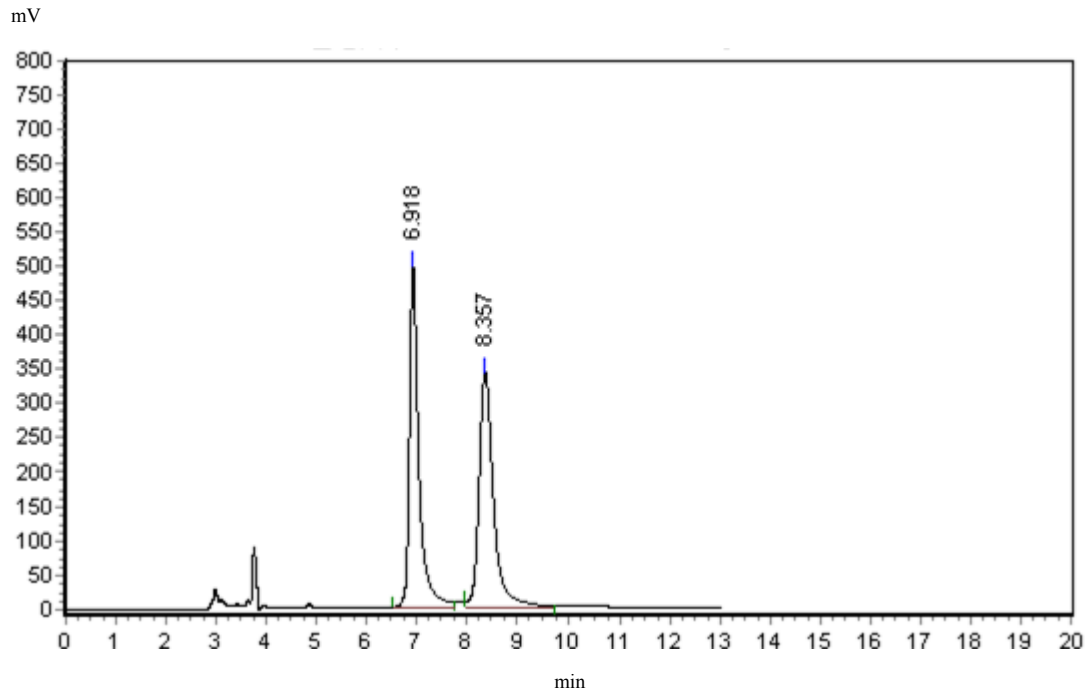

| Peak | RT (min) | Height (mV* sec) | Area (mV)    | Area (%) |
|------|----------|------------------|--------------|----------|
| 1    | 6.683    | 479092.938       | 10453592.000 | 48.1533  |
| 2    | 7.900    | 313905.781       | 11255392.000 | 51.8467  |

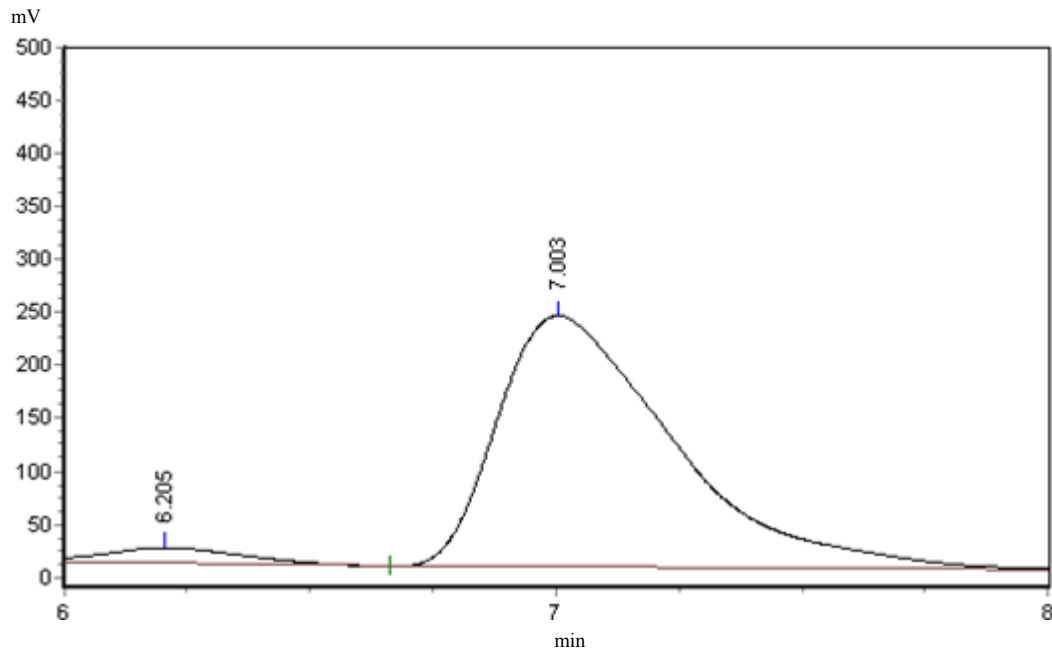

| Peak | RT (min) | Height (mV* sec) | Area (mV)   | Area (%) |
|------|----------|------------------|-------------|----------|
| 1    | 6.205    | 14882.733        | 302094.469  | 4.8603   |
| 2    | 7.003    | 237241.266       | 5913405.500 | 95.1397  |

### HPLC of 4q

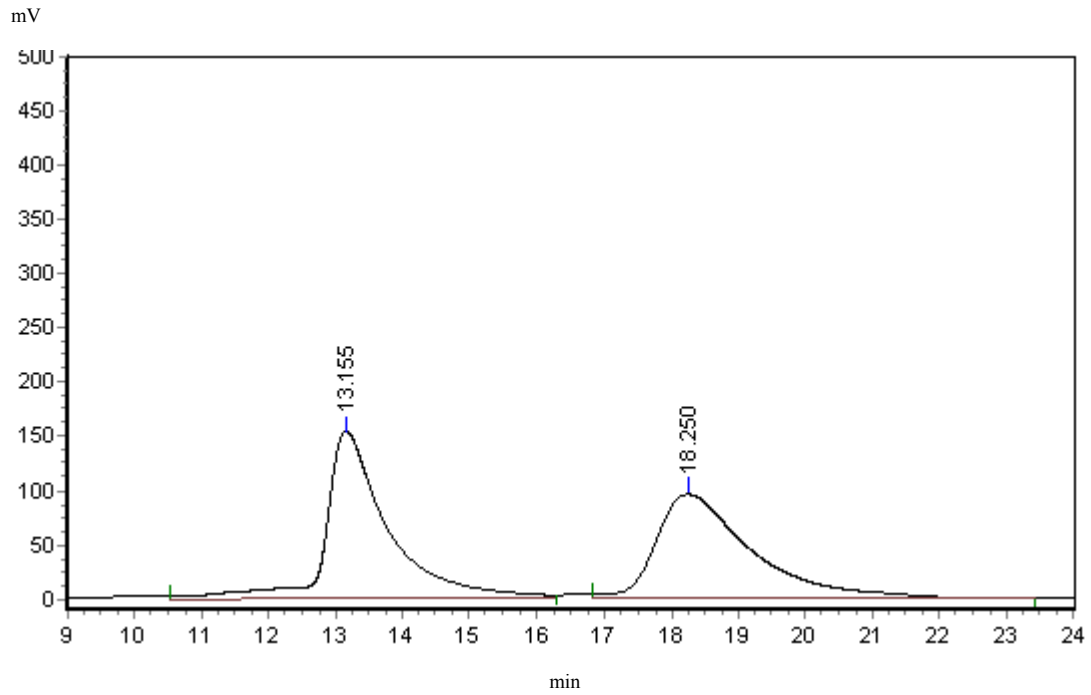

| Peak | RT (min) | Height (mV* sec) | Area (mV)    | Area (%) |
|------|----------|------------------|--------------|----------|
| 1    | 13.155   | 153791.766       | 10077794.000 | 51.2487  |
| 2    | 18.250   | 96628.953        | 9586699.000  | 48.7513  |

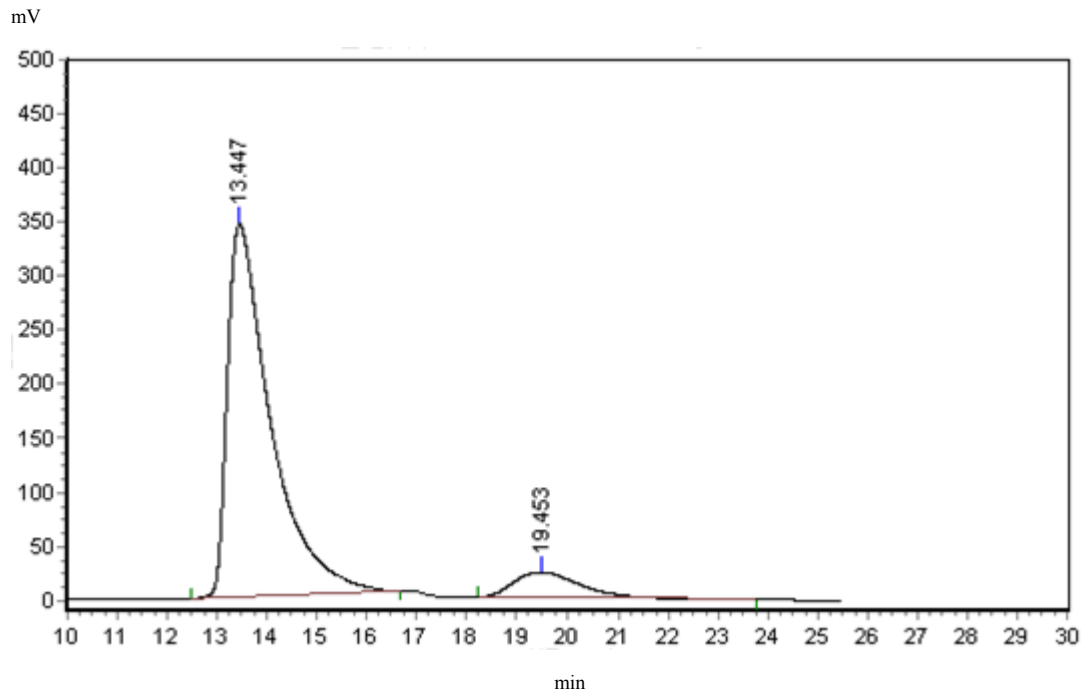

| Peak | RT (min) | Height (mV* sec) | Area (mV)    | Area (%) |
|------|----------|------------------|--------------|----------|
| 1    | 13.447   | 344779.594       | 20918870.000 | 90.5845  |
| 2    | 19.453   | 23620.676        | 2174350.250  | 9.4155   |

## HPLC of 4r

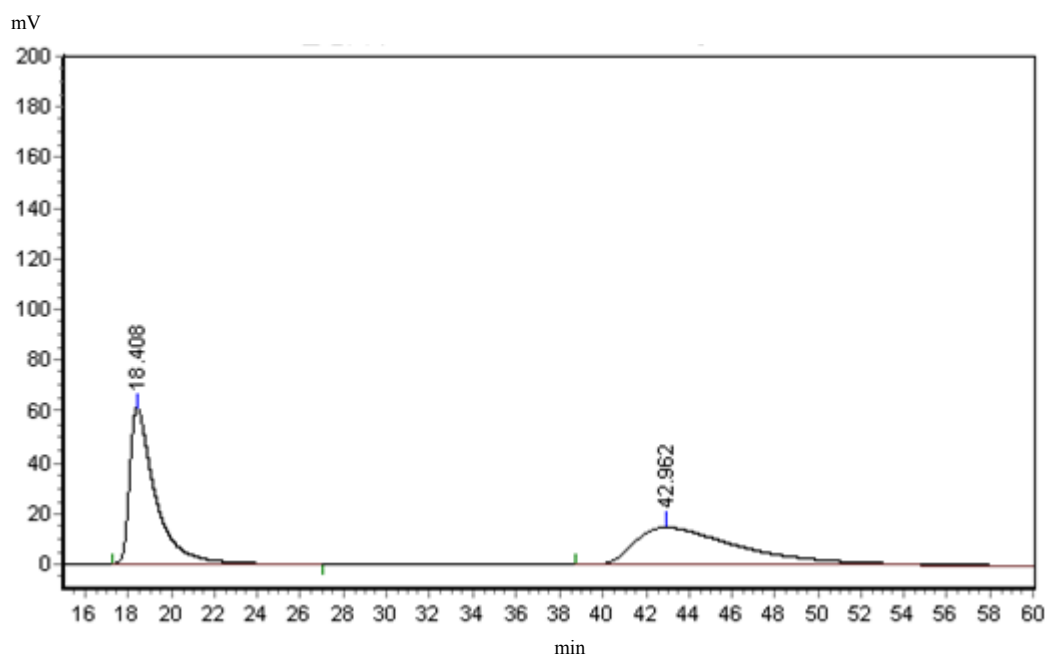

| Peak | RT (min) | Height (mV* sec) | Area (mV)   | Area (%) |
|------|----------|------------------|-------------|----------|
| 1    | 18.408   | 61593.785        | 5220820.000 | 50.2430  |
| 2    | 42.962   | 14787.083        | 5170321.500 | 49.7570  |

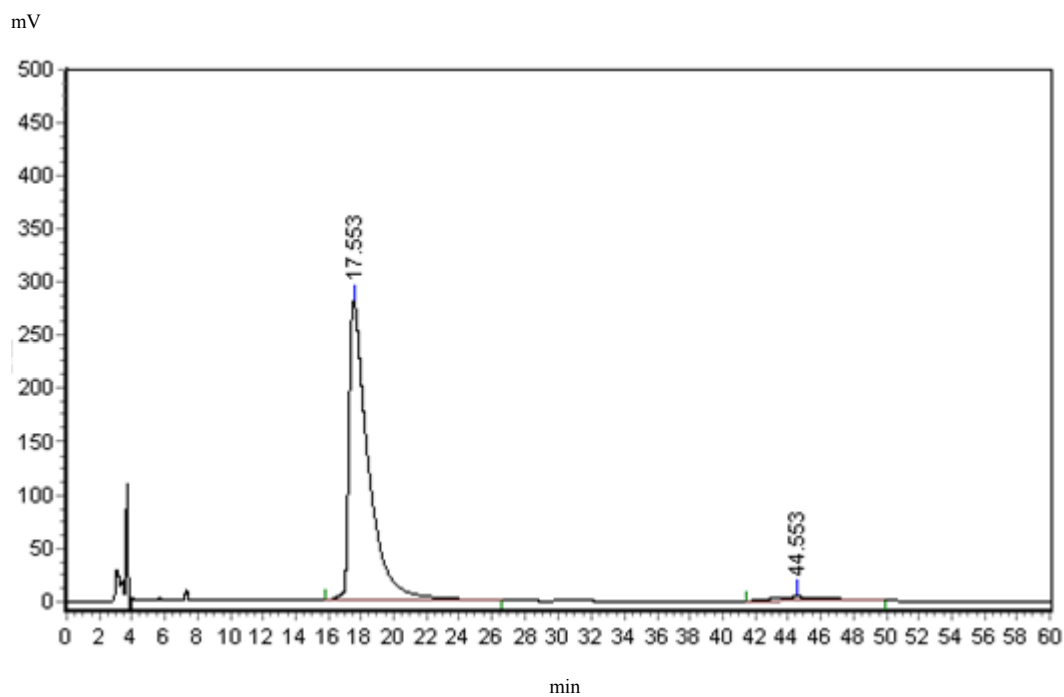

| Peak | RT (min) | Height (mV* sec) | Area (mV)    | Area (%) |
|------|----------|------------------|--------------|----------|
| 1    | 17.553   | 282925.813       | 23152622.000 | 95.9030  |
| 2    | 44.553   | 3829.811         | 989074.375   | 4.0970   |

### HPLC of 4r

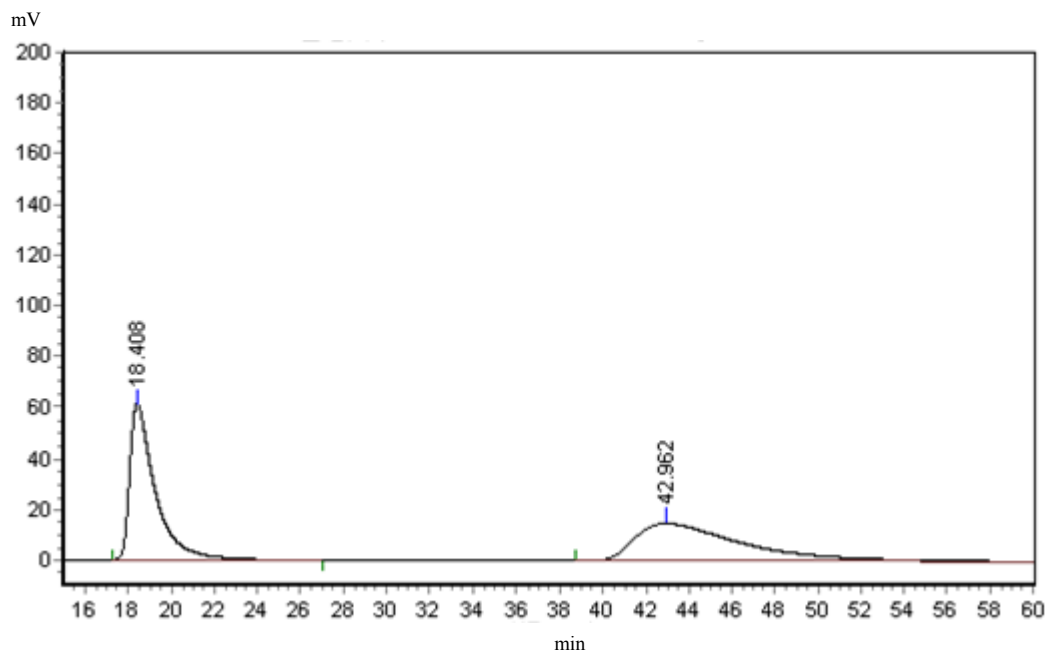

| Peak | RT (min) | Height (mV* sec) | Area (mV)   | Area (%) |
|------|----------|------------------|-------------|----------|
| 1    | 18.408   | 61593.785        | 5220820.000 | 50.2430  |
| 2    | 42.962   | 14787.083        | 5170321.500 | 49.7570  |

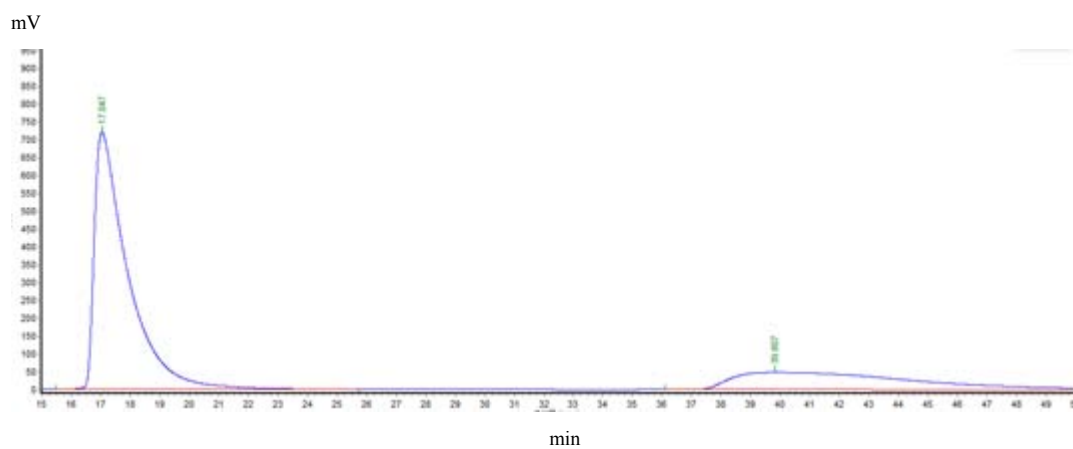

| Peak | RT (min) | Height (mV* sec) | Area (mV)    | Area (%) |
|------|----------|------------------|--------------|----------|
| 1    | 17.047   | 720118.250       | 56530640.000 | 73.5515  |
| 2    | 39.807   | 47790.965        | 20327964.000 | 26.4485  |

## HPLC of 4s

mV

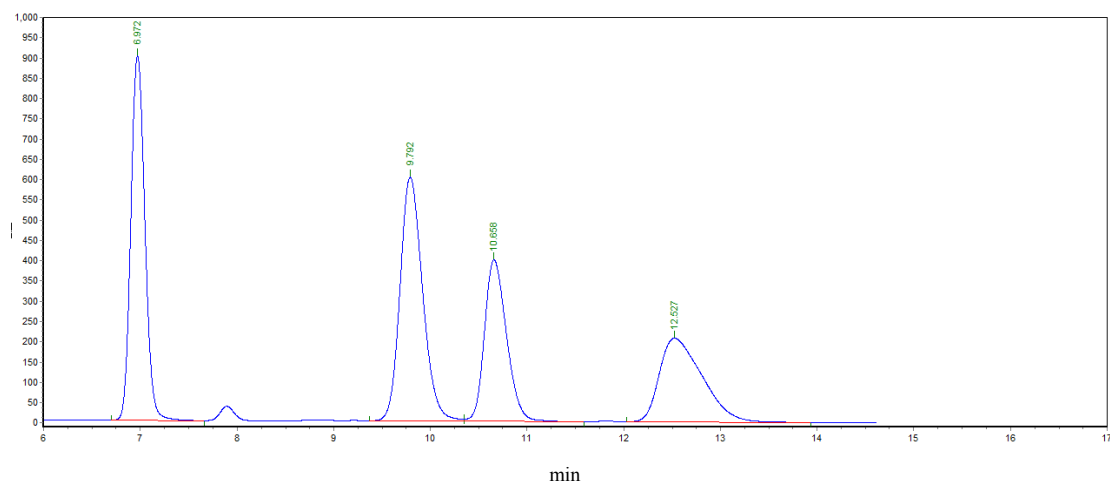

| Peak | RT (min) | Height (mV* sec) | Area (mV)   | Area (%) |
|------|----------|------------------|-------------|----------|
| 1    | 6.972    | 898813.188       | 9054237.000 | 28.7559  |
| 2    | 9.792    | 601734.750       | 9795805.000 | 31.1111  |
| 3    | 10.658   | 398656.031       | 6310513.500 | 20.0420  |
| 4    | 12.627   | 206747.531       | 6325955.500 | 20.0910  |

mV

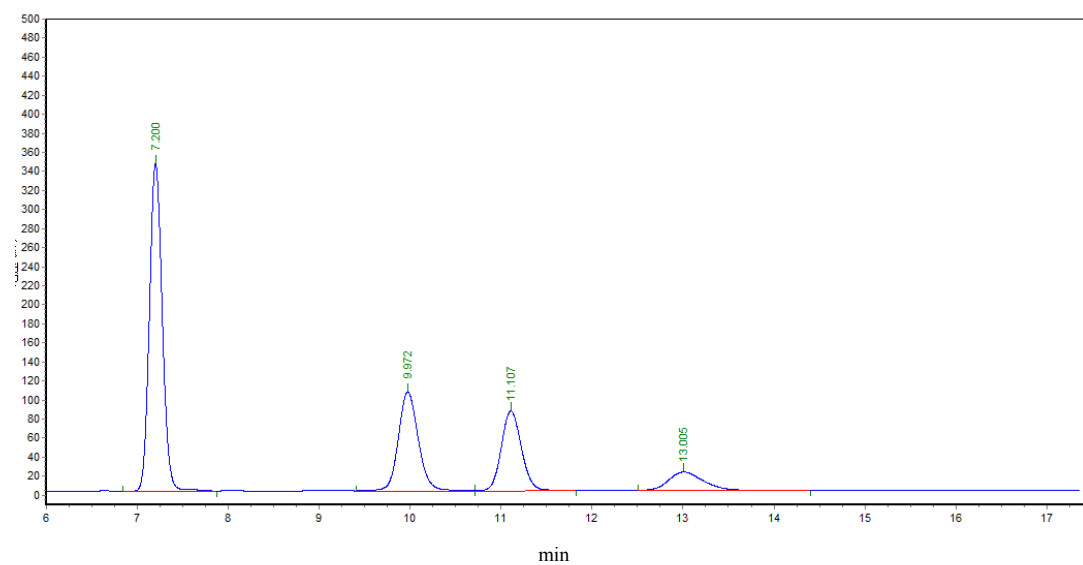

| Peak | RT (min) | Height (mV* sec) | Area (mV)   | Area (%) |
|------|----------|------------------|-------------|----------|
| 1    | 7.200    | 344111.750       | 3367361.000 | 49.4937  |
| 2    | 9.972    | 103987.711       | 1591791.000 | 23.3963  |
| 3    | 11.107   | 83987.828        | 1301169.625 | 19.1247  |
| 4    | 13.005   | 19659.314        | 543293.188  | 7.9854   |

## HPLC of 4t

mV

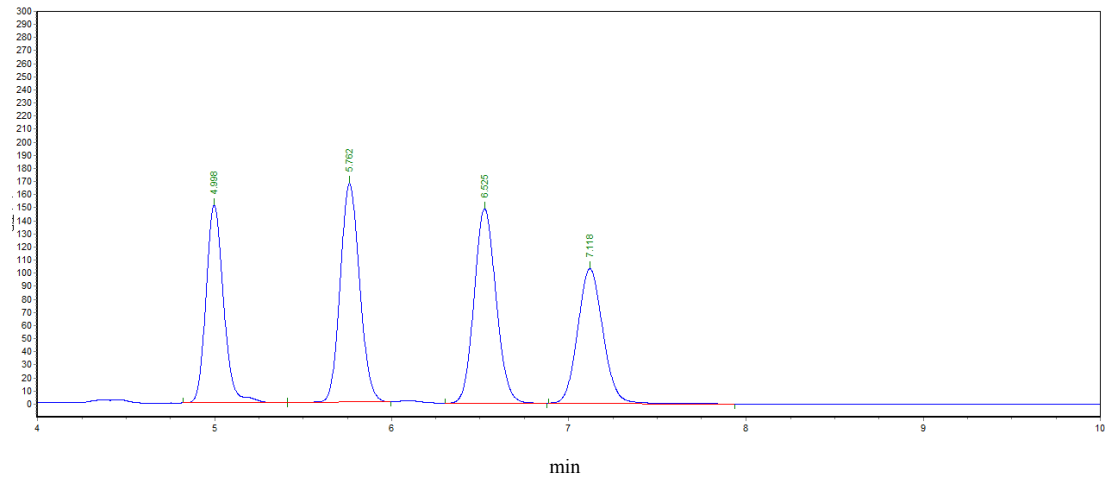

| Peak | RT (min) | Height (mV* sec) | Area (mV)   | Area (%) |
|------|----------|------------------|-------------|----------|
| 1    | 4.998    | 150850.672       | 1039758.813 | 22.5719  |
| 2    | 5.762    | 167162.016       | 1274317.625 | 27.6639  |
| 3    | 6.525    | 148394.813       | 1272198.500 | 27.6179  |
| 4    | 7.118    | 102594.703       | 1010974.750 | 21.9470  |

mV

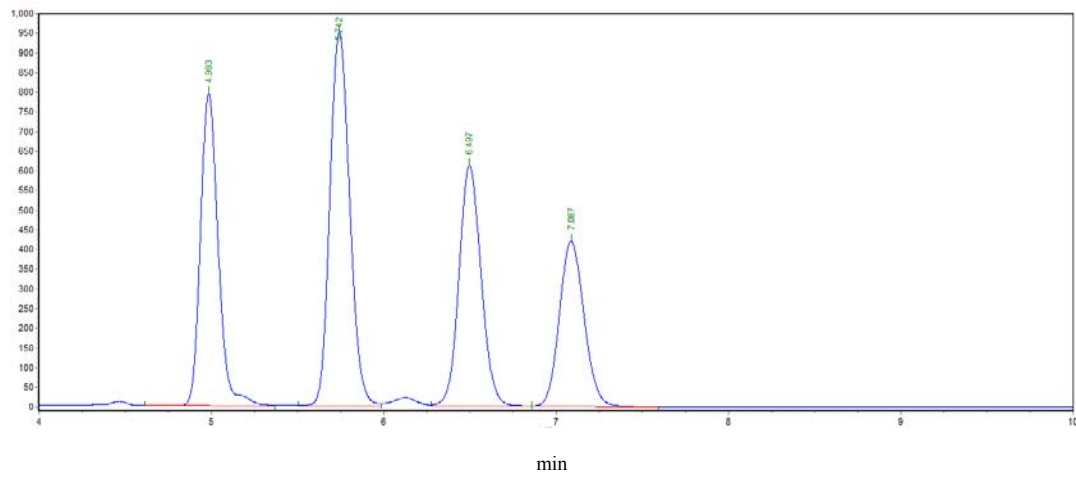

| Peak | RT (min) | Height (mV* sec) | Area (mV)   | Area (%) |
|------|----------|------------------|-------------|----------|
| 1    | 4.983    | 793119.813       | 5689085.500 | 24.8143  |
| 2    | 5.742    | 948559.563       | 7584803.500 | 33.0829  |
| 3    | 6.497    | 611976.313       | 5473074.500 | 23.8721  |
| 4    | 7.087    | 420453.281       | 4179677.500 | 18.2307  |



## HPLC of 5a

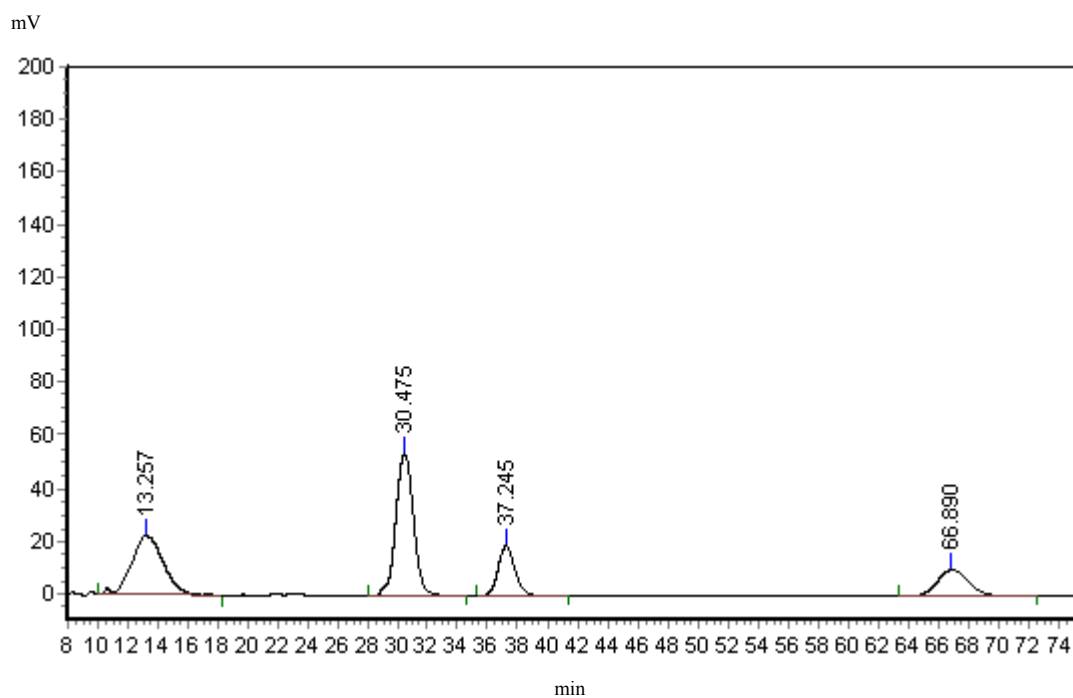

| Peak | RT (min) | Height (mV* sec) | Area (mV)   | Area (%) |
|------|----------|------------------|-------------|----------|
| 1    | 13.257   | 22426.738        | 3291263.250 | 30.7770  |
| 2    | 30.475   | 54164.758        | 4442871.000 | 41.5458  |
| 3    | 37.245   | 19012.500        | 1482697.750 | 13.8649  |
| 4    | 66.890   | 10181.925        | 1477084.125 | 13.8124  |

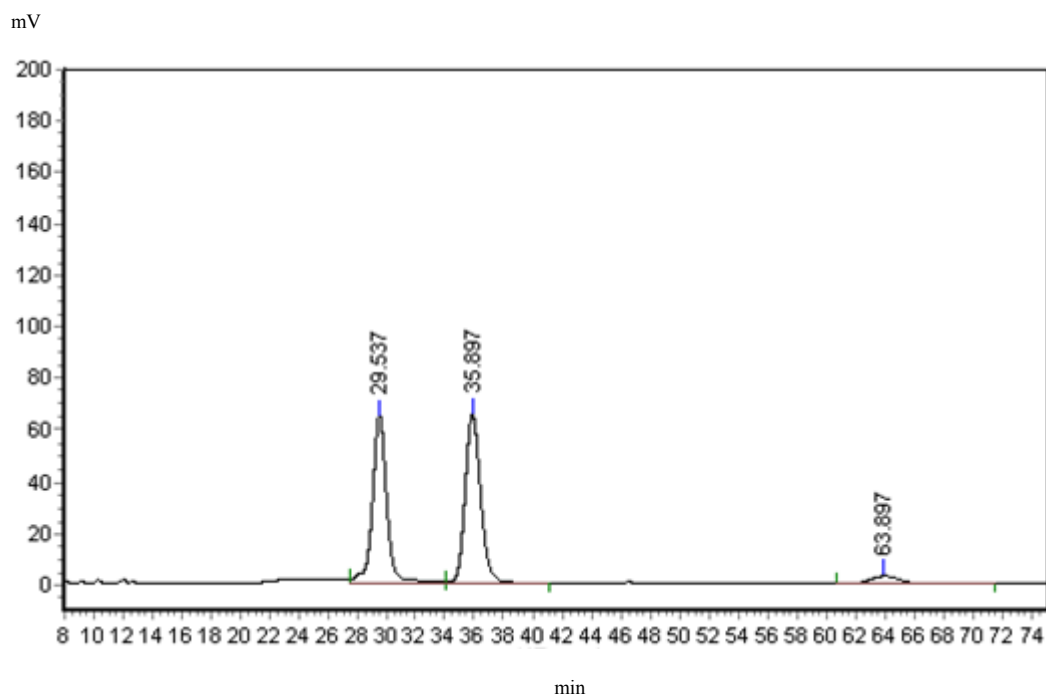

| Peak | RT (min) | Height (mV* sec) | Area (mV)   | Area (%) |
|------|----------|------------------|-------------|----------|
| 1    | 29.537   | 65306.953        | 4570532.000 | 45.9597  |
| 2    | 35.897   | 65824.969        | 4949439.000 | 49.7698  |
| 3    | 63.897   | 2951.955         | 424689.719  | 4.2705   |

## HPLC of 5b

mV

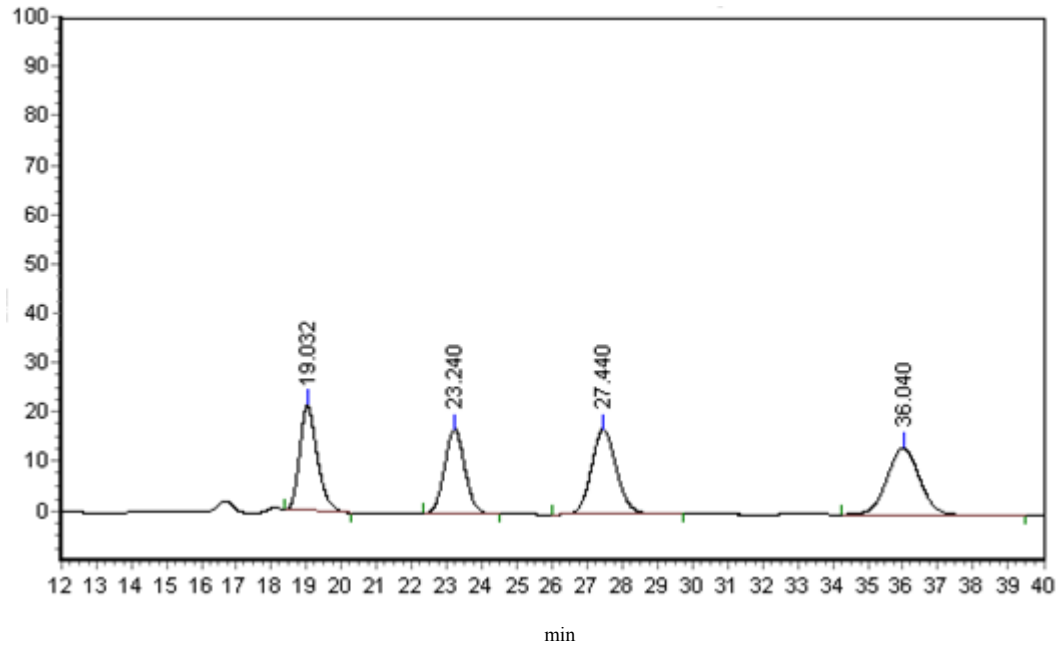

| Peak | RT (min) | Height (mV* sec) | Area (mV)  | Area (%) |
|------|----------|------------------|------------|----------|
| 1    | 19.032   | 21143.773        | 738936.750 | 23.7678  |
| 2    | 23.240   | 16748.318        | 667075.375 | 21.4564  |
| 3    | 27.440   | 17012.141        | 843352.188 | 27.1263  |
| 4    | 36.040   | 13355.760        | 859622.813 | 27.6496  |

mV

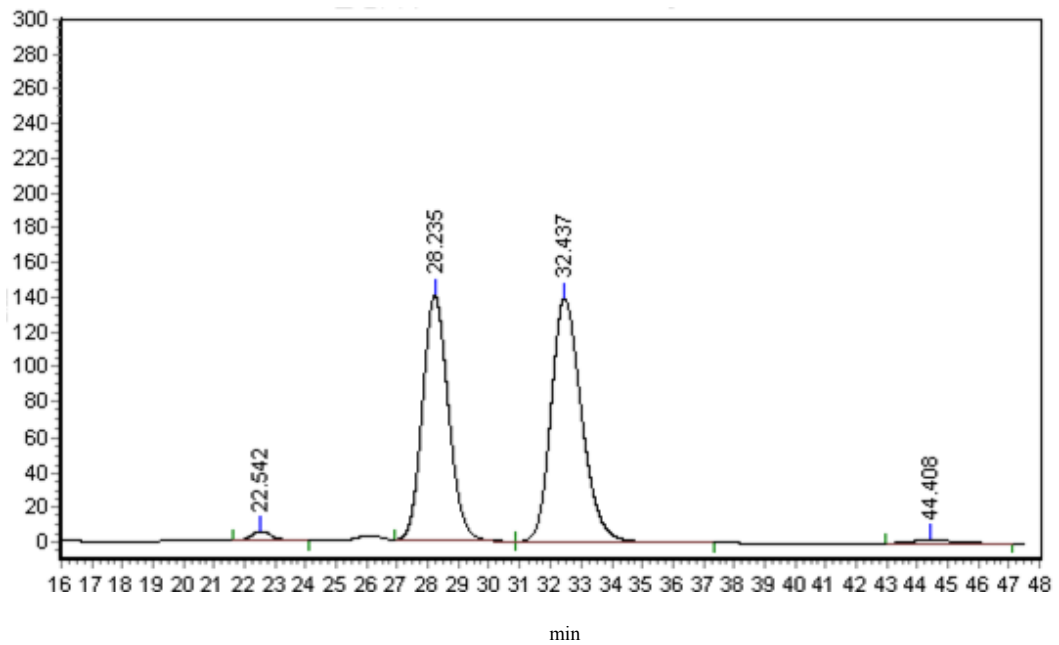

| Peak | RT (min) | Height (mV* sec) | Area (mV)   | Area (%) |
|------|----------|------------------|-------------|----------|
| 1    | 22.542   | 5459.855         | 263388.313  | 1.4285   |
| 2    | 28.235   | 140907.328       | 8323254.500 | 45.1427  |
| 3    | 32.437   | 139765.078       | 9652497.000 | 52.3521  |
| 4    | 44.408   | 1972.644         | 198518.500  | 1.0767   |

## HPLC of 5c

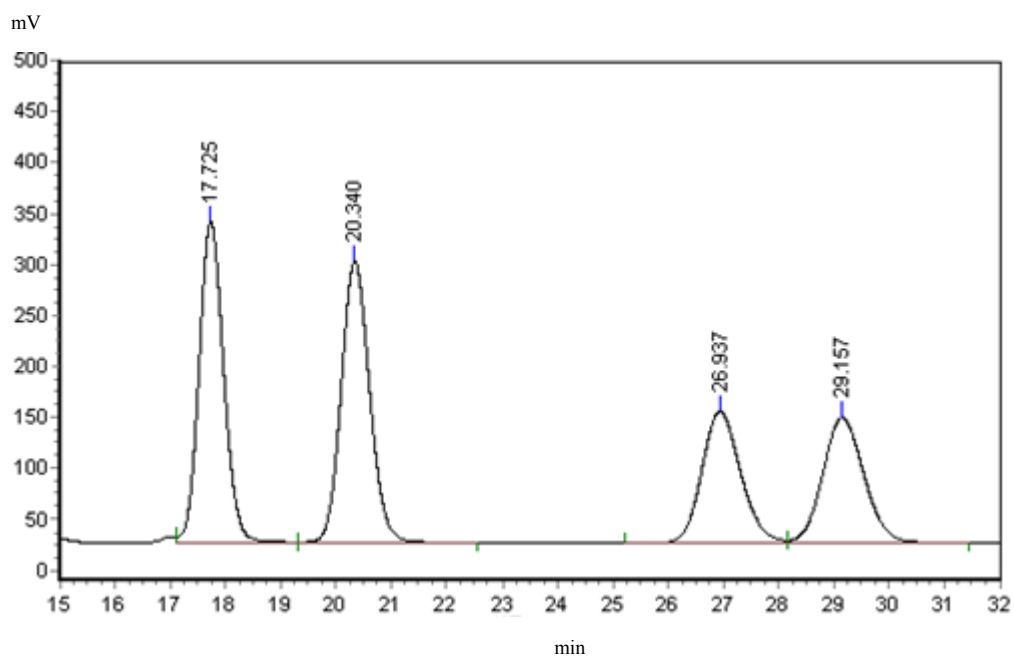

| Peak | RT (min) | Height (mV* sec) | Area (mV)   | Area (%) |
|------|----------|------------------|-------------|----------|
| 1    | 17.725   | 315418.906       | 9729642.000 | 30.2681  |
| 2    | 20.340   | 275811.125       | 9872428.000 | 30.7123  |
| 3    | 26.937   | 127705.289       | 6196280.500 | 19.2761  |
| 4    | 29.157   | 122038.148       | 6346519.000 | 19.7435  |

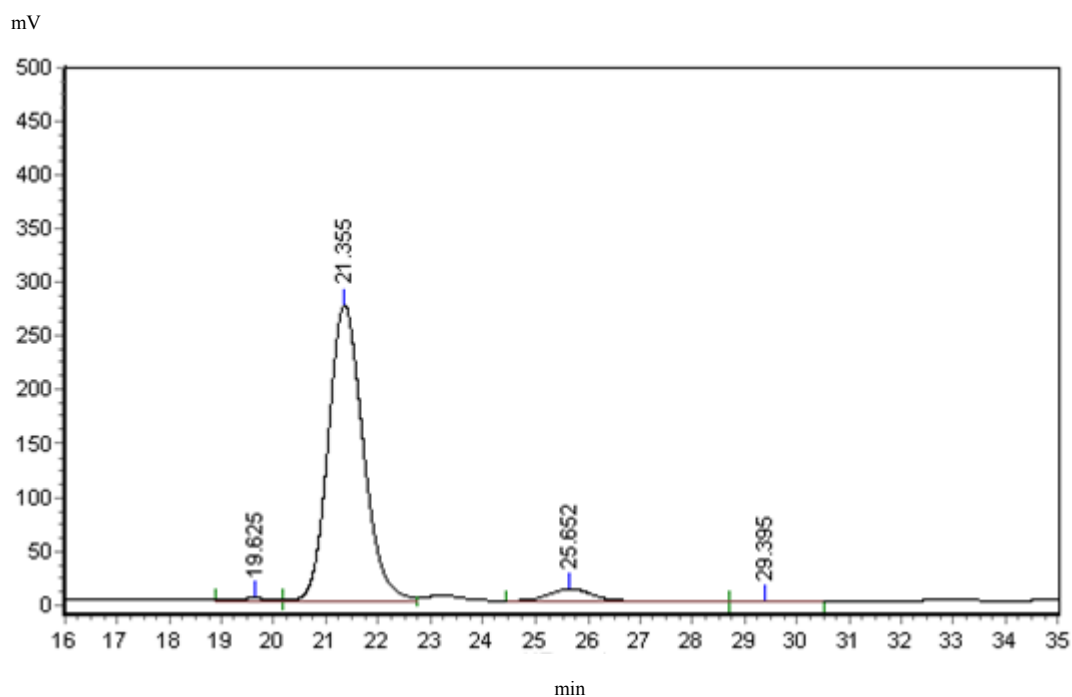

| Peak | RT (min) | Height (mV* sec) | Area (mV)    | Area (%) |
|------|----------|------------------|--------------|----------|
| 1    | 19.625   | 2955.859         | 99701.914    | 0.7379   |
| 2    | 21.355   | 275061.719       | 12745118.000 | 94.3279  |
| 3    | 25.652   | 11227.251        | 644778.375   | 4.7721   |
| 4    | 29.395   | 584.715          | 21909.023    | 0.1622   |

## HPLC of 5d

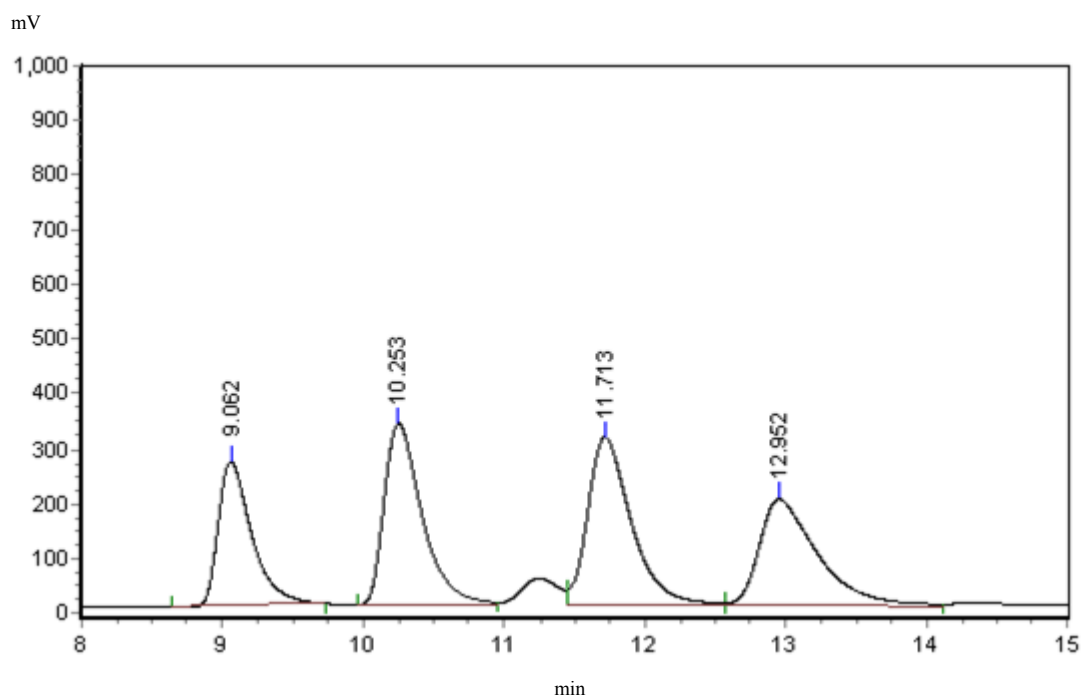

| Peak | RT (min) | Height (mV* sec) | Area (mV)   | Area (%) |
|------|----------|------------------|-------------|----------|
| 1    | 9.062    | 263193.344       | 4358545.500 | 19.0602  |
| 2    | 10.253   | 330281.500       | 6191629.000 | 27.0764  |
| 3    | 11.713   | 305050.313       | 6646415.500 | 29.0652  |
| 4    | 12.952   | 196104.734       | 5670702.000 | 24.7983  |

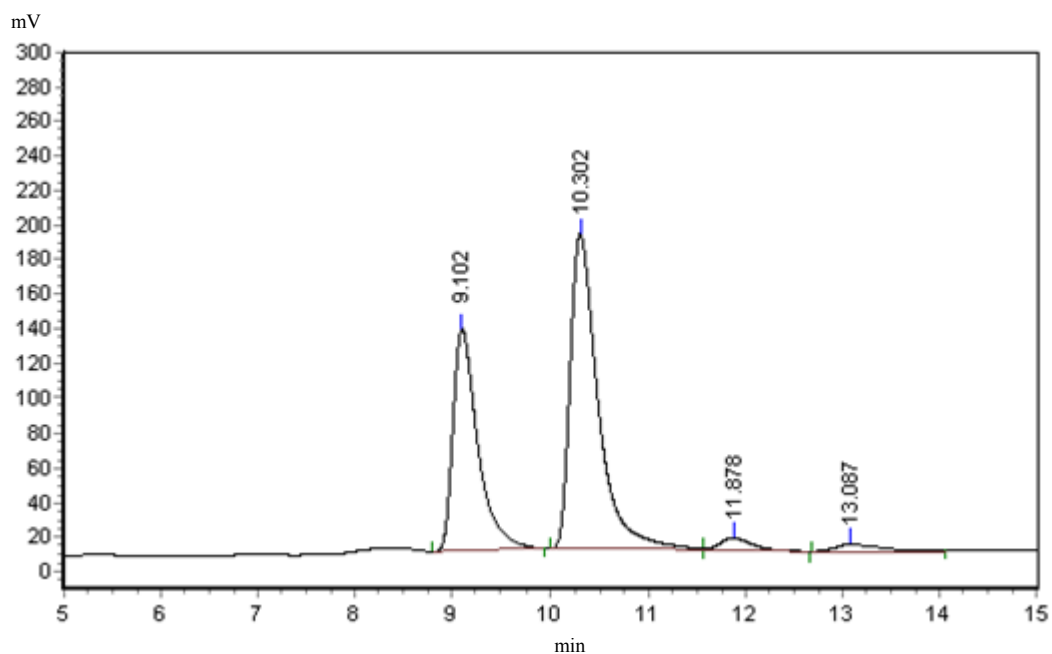

| Peak | RT (min) | Height (mV* sec) | Area (mV)   | Area (%) |
|------|----------|------------------|-------------|----------|
| 1    | 9.102    | 127964.516       | 2263274.250 | 36.1753  |
| 2    | 10.302   | 182153.156       | 3686440.500 | 58.9227  |
| 3    | 11.878   | 7326.750         | 176183.078  | 2.8160   |
| 4    | 13.087   | 3992.108         | 130501.336  | 2.0859   |

## HPLC of 5e

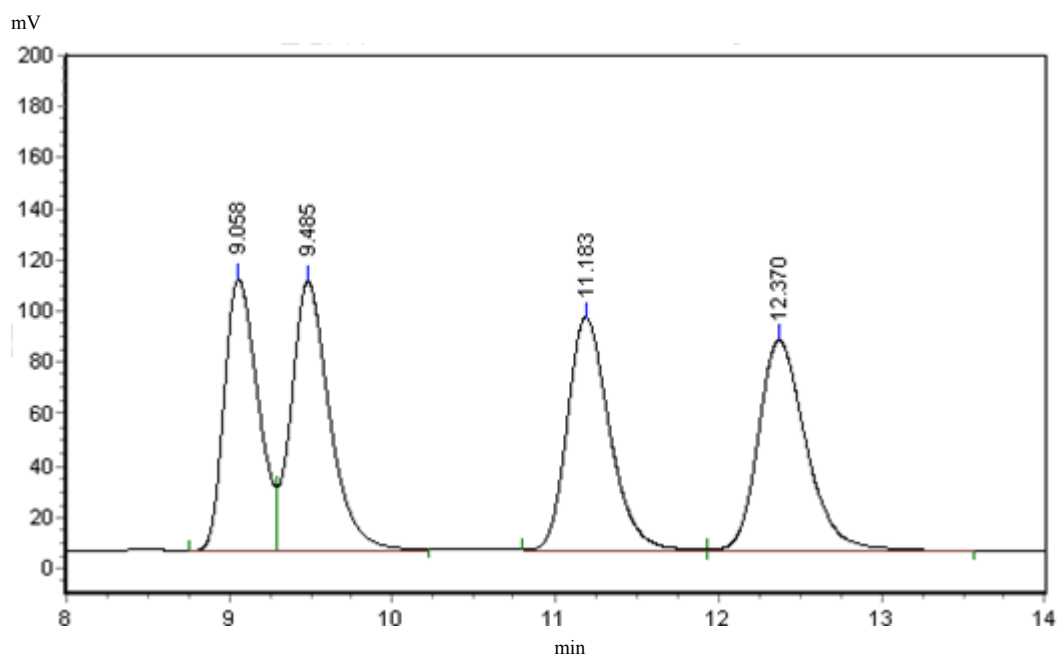

| Peak | RT (min) | Height (mV* sec) | Area (mV)   | Area (%) |
|------|----------|------------------|-------------|----------|
| 1    | 9.058    | 105580.305       | 1526023.375 | 23.4054  |
| 2    | 9.485    | 104522.461       | 1703589.500 | 26.1288  |
| 3    | 11.183   | 90939.422        | 1637436.750 | 25.1142  |
| 4    | 12.370   | 81468.328        | 1652920.875 | 25.3517  |

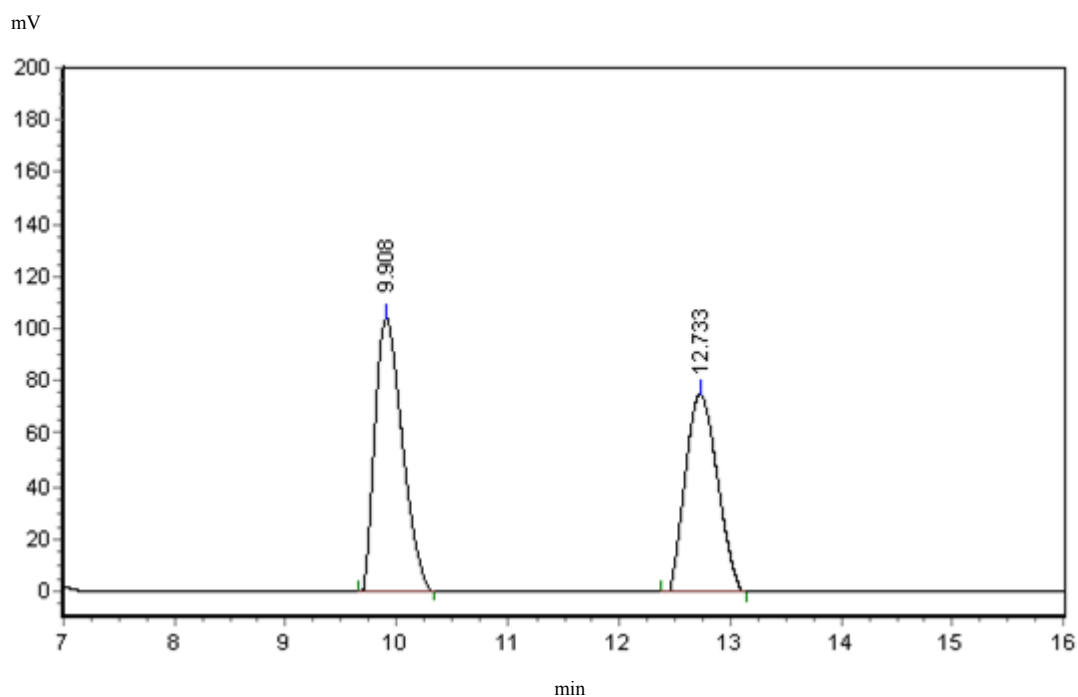

| Peak | RT (min) | Height (mV* sec) | Area (mV)   | Area (%) |
|------|----------|------------------|-------------|----------|
| 1    | 9.908    | 104007.148       | 1770796.125 | 54.2347  |
| 2    | 12.733   | 74899.594        | 1494264.000 | 45.7653  |

## HPLC of 5f

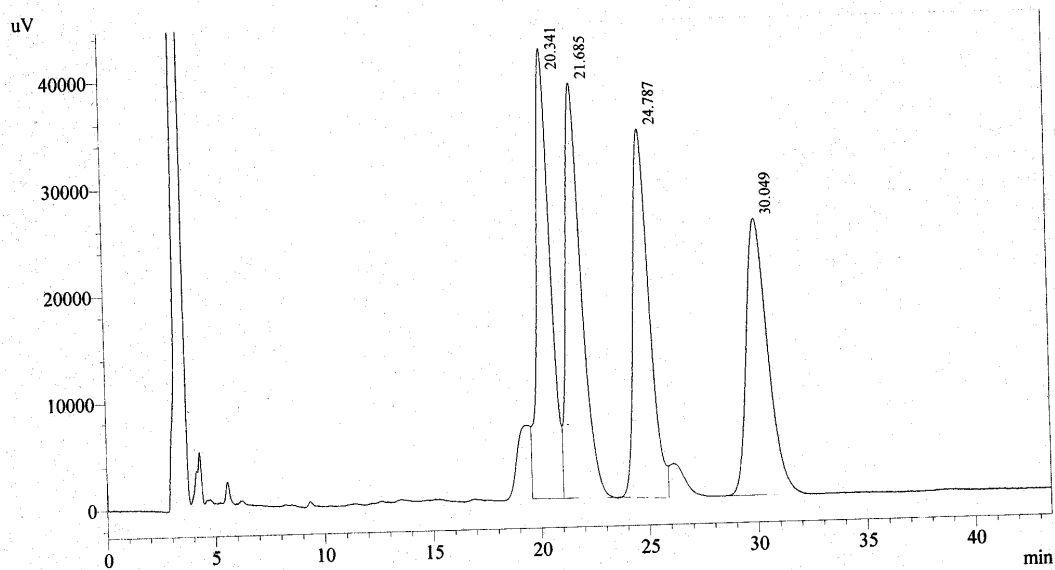

1 Det.A Ch1 / 215nm

| Detector A Ch1 215nm |           |         |        |         |          |
|----------------------|-----------|---------|--------|---------|----------|
| Peak#                | Ret. Time | Area    | Height | Area %  | Height % |
| 1                    | 20.341    | 1868106 | 42128  | 25.393  | 29.783   |
| 2                    | 21.685    | 1943418 | 38849  | 26.417  | 27.465   |
| 3                    | 24.787    | 1782877 | 34581  | 24.234  | 24.448   |
| 4                    | 30.049    | 1762432 | 25889  | 23.956  | 18.303   |
| Total                |           | 7356832 | 141447 | 100.000 | 100.000  |

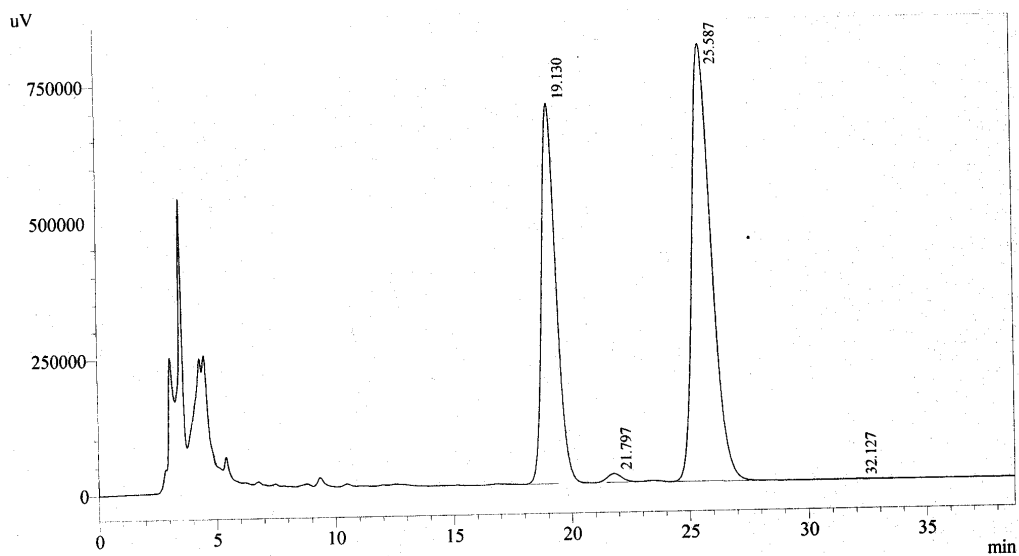

1 Det.A Ch1 / 254nm

| Detector A Ch1 254nm |           |          |         |         |          |
|----------------------|-----------|----------|---------|---------|----------|
| Peak#                | Ret. Time | Area     | Height  | Area %  | Height % |
| 1                    | 19.130    | 29696795 | 697846  | 39.112  | 46.001   |
| 2                    | 21.797    | 681413   | 15741   | 0.897   | 1.038    |
| 3                    | 25.587    | 45541856 | 803258  | 59.980  | 52.950   |
| 4                    | 32.127    | 8016     | 170     | 0.011   | 0.011    |
| Total                |           | 75928080 | 1517015 | 100.000 | 100.000  |

## 9. Single-Crystal X-ray Crystallography of Product 4d and 5f

Single-Crystal X-ray Crystallography of Product **4d** (CDCC number: CCDC 1000582)

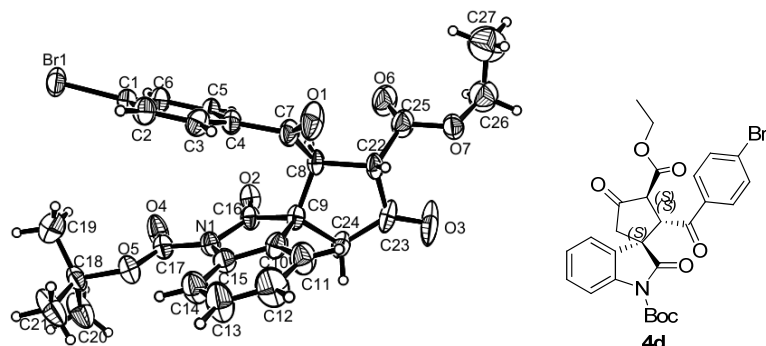

Bond precision: C-C = 0.0131 Å

Wavelength=0.71073

Cell: a=12.0921(5) b=12.0539(5) c=18.6826(8)  
 alpha=90 beta=100.115(4) gamma=90

Temperature: 290 K

|                        | Calculated      | Reported           |
|------------------------|-----------------|--------------------|
| Volume                 | 2680.8(2)       | 2680.8(2)          |
| Space group            | P 21            | P 21               |
| Hall group             | P 2yb           | P 2yb              |
| Moiety formula         | C27 H26 Br N O7 | ?                  |
| Sum formula            | C27 H26 Br N O7 | C54 H52 Br2 N2 O14 |
| Mr                     | 556.39          | 1112.79            |
| Dx, g cm <sup>-3</sup> | 1.379           | 1.379              |
| Z                      | 4               | 2                  |
| Mu (mm <sup>-1</sup> ) | 1.578           | 1.578              |
| F000                   | 1144.0          | 1144.0             |
| F000'                  | 1143.41         |                    |
| h,k,lmax               | 16,16,25        | 16,16,25           |
| Nref                   | 14466[ 7560]    | 12422              |
| Tmin,Tmax              | 0.563,0.623     | 0.793,1.000        |
| Tmin'                  | 0.552           |                    |

Correction method= MULTI-SCAN

Data completeness= 1.64/0.86 Theta(max)= 29.131

R(reflections)= 0.0658( 6446) wR2(reflections)= 0.1806( 12422)

S = 1.002

Npar= Npar = 669

Single-Crystal X-ray Crystallography of Product **5f** (CDCC number: CCDC 999669)

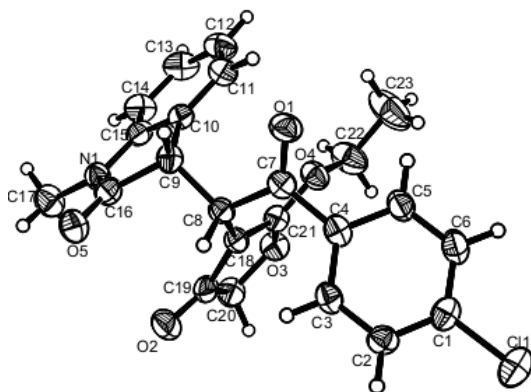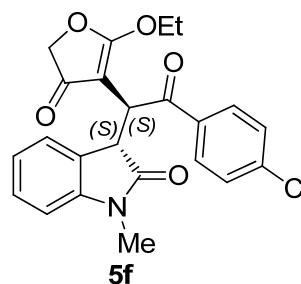

Bond precision: C-C = 0.0086 Å

Wavelength=0.71073

Cell: a=10.7660(7) b=8.7896(5) c=13.4136(9)  
alpha=90 beta=108.706(7) gamma=90

Temperature: 291 K

|                                     | Calculated                                                                            | Reported                                            |
|-------------------------------------|---------------------------------------------------------------------------------------|-----------------------------------------------------|
| Volume                              | 1202.26(14)                                                                           | 1202.26(14)                                         |
| Space group                         | P 21                                                                                  | P 21                                                |
| Hall group                          | P 2yb                                                                                 | P 2yb                                               |
| Moiety formula                      | C <sub>23</sub> H <sub>20</sub> Cl N O <sub>5</sub> , C <sub>2</sub> H <sub>6</sub> O | ?                                                   |
| Sum formula                         | C <sub>25</sub> H <sub>26</sub> Cl N O <sub>6</sub>                                   | C <sub>25</sub> H <sub>26</sub> Cl N O <sub>6</sub> |
| Mr                                  | 471.92                                                                                | 471.92                                              |
| D <sub>x</sub> , g cm <sup>-3</sup> | 1.304                                                                                 | 1.304                                               |
| Z                                   | 2                                                                                     | 2                                                   |
| Mu (mm <sup>-1</sup> )              | 0.199                                                                                 | 0.199                                               |
| F <sub>000</sub>                    | 496.0                                                                                 | 496.0                                               |
| F <sub>000</sub> '                  | 496.54                                                                                |                                                     |
| h,k,l <sub>max</sub>                | 13,10,16                                                                              | 13,10,16                                            |
| N <sub>ref</sub>                    | 4899[ 2616]                                                                           | 4777                                                |
| T <sub>min</sub> ,T <sub>max</sub>  | 0.931,0.942                                                                           | 0.779,1.000                                         |
| T <sub>min</sub> '                  | 0.931                                                                                 |                                                     |

Correction method= MULTI-SCAN



Data completeness= 1.83/0.98

Theta(max)= 26.369

R(reflections)= 0.0615( 3268)

wR2(reflections)= 0.1532( 4777)

S = 1.034

Npar= Npar = 300
